# Supplementary material for: Genomic characterisation of Mycoplasma genitalium in Victoria, Australia, reveals lineage diversification and drivers of antimicrobial resistance.
Source: Research Square preprint supplement (doi:10.21203/rs.3.rs-8547379/v1), 2026-01-19
Supplement: Supplementary file 2 [file b96f3253f099a2fa0dc9a01d.xlsx]

## Sheet: Sheet1
	M.genitalium cgMLST schema V.1
	Genome	Locus ID	Protein ID	Product Description	Gene Name	Proteome BSR	Start Position	Stop Position	Coding Strand
	DW375	DW375-protein951	951	*			1339	1723	0
	DW386	DW386-protein249	249	*			333	738	0
	DW013	DW013-protein126	126	DNA gyrase subunit B	gyrB	1	2527	3556	1
	DW129	DW129-protein1003	1003	*			1319	1736	0
	DW419	DW419-protein252	252	*			0	264	1
	DW428	DW428-protein966	966	hypothetical protein			230	488	1
	DW027	DW027-protein60	60	Guanylate kinase	gmk	1	33536	34106	0
	DW013	DW013-protein629	629	Probable ATP-dependent RNA helicase MG425	MG425	1.01	721	1669	0
	DW013	DW013-protein298	298	*			371	632	0
	DW436	DW436-protein1074	1074	*			33	321	0
	M6604	M6604-protein941	941	*			236275	236581	1
	R32G	R32G-protein218	218	*			124943	125462	1
	DW027	DW027-protein862	862	Processive diacylglycerol beta-glycosyltransferase	MG335.2	1.02	4570	5083	0
	DW041	DW041-protein1037	1037	*			29	440	1
	DW414	DW414-protein937	937	*			45	489	0
	DW013	DW013-protein193	193	Serine hydroxymethyltransferase	glyA	0.99	5787	6114	0
	DW013	DW013-protein270	270	Major facilitator superfamily transporter MG061	MG061	1.01	1503	1950	1
	DW027	DW027-protein907	907	Uncharacterized protein			70	475	1
	DW129	DW129-protein1059	1059	*			190	559	0
	DW292	DW292-protein1038	1038	*			118	481	0
	DW419	DW419-protein229	229	*			11	335	0
	DW013	DW013-protein687	687	tRNA uridine 5-carboxymethylaminomethyl modification enzyme MnmG	mnmG	1	758	1292	0
	DW148	DW148-protein1024	1024	*			194	842	1
	DW043	DW043-protein338	338	*			185	461	0
	DW108	DW108-protein986	986	*			181	607	0
	DW027	DW027-protein29	29	DNA topoisomerase 1	topA	1	17906	19346	0
	DW027	DW027-protein82	82	Uncharacterized lipoprotein MG095	MG095	1.02	48336	48684	0
	DW013	DW013-protein335	335	ATP synthase gamma chain	atpG	1	1785	2133	1
	DW043	DW043-protein370	370	*			236	650	0
	DW119	DW119-protein964	964	*			7	334	1
	DW013	DW013-protein40	40	Fructose-bisphosphate aldolase	fba	1.01	4267	4564	1
	DW013	DW013-protein738	738	Uncharacterized lipoprotein MG338	MG338	1.02	1220	1424	1
	DW043	DW043-protein362	362	*			29	743	1
	DW013	DW013-protein613	613	Uncharacterized protein MG397	MG397	0.99	1555	1906	0
	DW077	DW077-protein324	324	Glycerol kinase	glpK	1.01	44542	44866	0
	DW027	DW027-protein872	872	Minor capsid protein			694	1729	0
	DW013	DW013-protein504	504	Thioredoxin reductase	trxB	1	1992	2940	1
	DW427	DW427-protein988	988	*			134	494	1
	DW013	DW013-protein387	387	Putative esterase/lipase 1	MG310	1.03	3581	3797	0
	DW390	DW390-protein1046	1046	*			37	442	1
	DW027	DW027-protein369	369	Small ribosomal subunit protein uS3	rpsC	1	20355	21006	0
	M6284	M6284-protein839	839	Uncharacterized protein MG220	MG220	0.6	38798	39113	0
	DW436	DW436-protein1069	1069	*			14	371	0
	DW438	DW438-protein983	983	*			1416	2064	1
	DW368	DW368-protein1053	1053	*			14	233	0
	DW039	DW039-protein843	843	Tyrosine--tRNA ligase	tyrS	0.99	37533	37935	1
	DW141	DW141-protein802	802	Probable GTP-binding protein EngB	engB	0.99	36	618	0
	DW395	DW395-protein680	680	*			1611	2235	1
	DW292	DW292-protein905	905	*			359	1172	0
	DW013	DW013-protein831	831	Cytadherence high molecular weight protein 1	hmw1	1.05	545	887	1
	DW374	DW374-protein7	7	head-tail connector protein			5847	6201	1
	DW409	DW409-protein1026	1026	*			2	398	0
	DW013	DW013-protein656	656	ATP synthase subunit b	atpF	1.01	306	552	0
	M6604	M6604-protein217	217	*			130614	130893	1
	DW013	DW013-protein291	291	Leucine--tRNA ligase	leuS	1	1540	2029	0
	DW427	DW427-protein592	592	Uncharacterized protein MG288	MG288	0.98	727	967	0
	DW013	DW013-protein82	82	Phosphomannomutase	manB	1	9843	10791	1
	DW148	DW148-protein989	989	*			325	727	0
	DW079	DW079-protein989	989	*			183	468	1
	DW429	DW429-protein609	609	Uncharacterized lipoprotein MG439	MG439	1	15865	16084	0
	DW285	DW285-protein77	77	*			44801	45038	0
	DW409	DW409-protein982	982	*			65	416	0
	DW033	DW033-protein153	153	Uncharacterized protein MG144	MG144	0.97	90108	90537	1
	DW436	DW436-protein1106	1106	*			2	266	1
	DW360	DW360-protein537	537	*			523	865	0
	DW027	DW027-protein498	498	Uncharacterized lipoprotein MG309	MG309	1.02	25356	25719	0
	DW050	DW050-protein1033	1033	*			22	406	0
	DW013	DW013-protein756	756	Uncharacterized lipoprotein MG307	MG307	1	26	734	1
	DW013	DW013-protein522	522	Uncharacterized ABC transporter permease MG064	MG064	1	866	1175	0
	DW013	DW013-protein99	99	Uncharacterized protein MG241	MG241	1.01	7018	7504	1
	DW148	DW148-protein997	997	*			134	659	0
	DW440	DW440-protein706	706	*			45	675	0
	DW345	DW345-protein777	777	Threonine--tRNA ligase	thrS	0.92	58	286	1
	DW013	DW013-protein485	485	Uncharacterized protein MG127	MG127	1	2736	3174	1
	M2282	M2282-protein42	42	Energy-coupling factor transporter ATP-binding protein EcfA2	ecfA2	0.98	20701	21625	0
	DW483	DW483-protein899	899	*			7	310	1
	DW058	DW058-protein533	533	*			33897	34122	0
	DW286	DW286-protein666	666	*			318	723	1
	DW013	DW013-protein259	259	DNA-directed RNA polymerase subunit beta	rpoB	1.01	2224	2494	0
	DW289	DW289-protein717	717	Putative ABC transporter ATP-binding protein MG304	MG304	0.89	71	983	0
	DW428	DW428-protein984	984	*			3	357	1
	DW341	DW341-protein342	342	*			4050	4284	0
	DW013	DW013-protein363	363	Large ribosomal subunit protein bL20	rplT	1	3111	3486	0
	DW013	DW013-protein794	794	*			547	937	0
	DW013	DW013-protein27	27	Oligopeptide transport system permease protein OppC	oppC	1.01	15467	15953	0
	DW351	DW351-protein465	465	*			1067	3827	0
	DW013	DW013-protein279	279	Probable ABC transporter permease protein MG189	MG189	1	704	905	1
	DW365	DW365-protein649	649	*			399	1326	0
	DW013	DW013-protein397	397	Ribosome-recycling factor	frr	1	2698	3127	0
	DW374	DW374-protein141	141	*			3560	3890	1
	DW285	DW285-protein544	544	*			16721	17210	0
	DW436	DW436-protein1075	1075	*			28	466	0
	DW405	DW405-protein894	894	*			216	534	0
	DW013	DW013-protein211	211	UvrABC system protein C	uvrC	0.99	2238	3699	1
	DW444	DW444-protein989	989	*			837	1323	1
	DW148	DW148-protein1051	1051	*			29	299	1
	DW013	DW013-protein242	242	Pyruvate dehydrogenase E1 component subunit beta	pdhB	0.98	4500	4725	0
	DW013	DW013-protein679	679	Putative ABC transporter ATP-binding protein MG468.1	MG468.1	1	400	1249	1
	DW013	DW013-protein811	811	*			413	635	1
	DW379	DW379-protein977	977	*			12	366	0
	M6270	M6270-protein765	765	Putative ABC transporter ATP-binding protein MG187	MG187	0.96	448188	448488	0
	DW396	DW396-protein922	922	*			275	716	0
	DW384	DW384-protein1003	1003	*			101	686	1
	DW284	DW284-protein733	733	*			377	767	1
	DW013	DW013-protein721	721	Uncharacterized protein MG443	MG443	1	898	1396	0
	DW129	DW129-protein1021	1021	*			3	411	0
	DW430	DW430-protein969	969	*			920	1295	1
	DW077	DW077-protein979	979	*			359	1892	1
	DW065	DW065-protein1006	1006	*			1906	2110	0
	DW079	DW079-protein984	984	*			386	611	1
	DW276	DW276-protein841	841	*			481	964	0
	DW386	DW386-protein9	9	Mgp-operon protein 3	MG192	0.81	3200	3743	1
	DW013	DW013-protein556	556	Histidine--tRNA ligase	hisS	1.01	2289	2538	0
	DW373	DW373-protein976	976	*			277	646	0
	DW166	DW166-protein1001	1001	*			115	442	1
	DW394	DW394-protein81	81	Phage protein			186	474	0
	DW013	DW013-protein574	574	Probable endonuclease 4	nfo	0.99	1642	2488	1
	DW310	DW310-protein847	847	*			205	466	1
	DW013	DW013-protein922	922	*			240	480	0
	DW271	DW271-protein625	625	*			90	573	0
	DW013	DW013-protein600	600	Phosphate transport system permease protein PstA homolog	pstA	0.99	1312	1513	1
	DW483	DW483-protein905	905	*			307	535	0
	DW013	DW013-protein372	372	*			3151	3361	1
	DW013	DW013-protein343	343	Uncharacterized protein MG223	MG223	1	1885	3121	0
	DW148	DW148-protein984	984	*			1380	1830	0
	DW387	DW387-protein1006	1006	*			44	311	1
	DW423	DW423-protein406	406	DNA topoisomerase 4 subunit B	parE	0.99	71406	73155	0
	DW413	DW413-protein985	985	*			184	568	0
	M6090	M6090-protein805	805	Uncharacterized protein MG255	MG255	0.91	77821	78124	1
	DW013	DW013-protein273	273	Uncharacterized glycosyltransferase MG060	MG060	1.01	2624	2891	0
	DW013	DW013-protein426	426	Dephospho-CoA kinase	coaE	1.02	3451	3670	1
	DW027	DW027-protein287	287	Putative 1-phosphofructokinase	fruK	1	20837	21605	0
	DW148	DW148-protein1039	1039	*			115	658	0
	DW268	DW268-protein983	983	*			13	259	1
	DW440	DW440-protein750	750	*			14	260	1
	DW387	DW387-protein1080	1080	*			137	362	0
	DW285	DW285-protein864	864	*			368	959	1
	DW414	DW414-protein901	901	*			48	603	1
	DW013	DW013-protein243	243	Pyruvate dehydrogenase E1 component subunit beta	pdhB	1.01	4749	5481	0
	DW047	DW047-protein231	231	*			90	297	1
	DW483	DW483-protein926	926	*			205	487	0
	DW033	DW033-protein594	594	Uncharacterized protein MG414	MG414	0.99	1434	2073	1
	DW013	DW013-protein415	415	*			979	1897	0
	DW013	DW013-protein484	484	Tryptophan--tRNA ligase	trpS	1	1657	2701	0
	DW013	DW013-protein507	507	tRNA pseudouridine synthase A	truA	1	1022	1667	1
	DW027	DW027-protein407	407	Uncharacterized protein MG286	MG286	1	200	713	0
	M2300	M2300-protein90	90	Spermidine/putrescine import ATP-binding protein PotA	potA	0.99	47986	48871	0
	DW129	DW129-protein1006	1006	*			210	492	0
	DW013	DW013-protein734	734	*			510	726	0
	DW085	DW085-protein1008	1008	*			471	861	1
	DW429	DW429-protein908	908	*			2539	3064	0
	DW423	DW423-protein1008	1008	*			237	438	1
	DW013	DW013-protein265	265	Phosphate acetyltransferase	pta	0.99	2410	3064	1
	DW013	DW013-protein254	254	Large ribosomal subunit protein uL6	rplF	0.98	3210	3672	1
	DW121	DW121-protein720	720	*			593	848	1
	DW013	DW013-protein744	744	Uncharacterized protein MG371	MG371	1.02	1036	1291	1
	DW013	DW013-protein373	373	P32 adhesin	MG318	1.03	3434	3638	0
	DW013	DW013-protein609	609	*			1529	1835	0
	DW482	DW482-protein956	956	*			2	398	0
	DW463	DW463-protein993	993	*			3	372	1
	DW013	DW013-protein500	500	UDP-glucose 4-epimerase	galE	1	1129	1870	1
	DW013	DW013-protein790	790	Uncharacterized protein			593	998	1
	DW398	DW398-protein898	898	*			1400	1754	0
	DW368	DW368-protein1029	1029	*			27	414	1
	DW027	DW027-protein858	858	Uncharacterized protein MG337	MG337	1	2302	2719	0
	DW346	DW346-protein855	855	*			730	1459	0
	DW108	DW108-protein972	972	*			113	554	0
	DW085	DW085-protein1016	1016	*			228	621	0
	DW436	DW436-protein896	896	*			34	913	0
	DW079	DW079-protein1015	1015	*			80	335	1
	DW402	DW402-protein1087	1087	*			11	344	1
	DW013	DW013-protein314	314	*			4016	4286	1
	DW360	DW360-protein479	479	*			7607	7967	0
	DW129	DW129-protein1017	1017	*			12	558	1
	DW299	DW299-protein1019	1019	*			348	594	0
	DW027	DW027-protein709	709	ATP synthase subunit delta	atpH	1	4529	5060	0
	DW013	DW013-protein346	346	Uncharacterized protein MG328	MG328	0.99	280	751	1
	DW443	DW443-protein1059	1059	*			0	375	1
	DW013	DW013-protein603	603	Uncharacterized protein MG369	MG369	1	1723	2236	0
	DW033	DW033-protein993	993	*			40	415	0
	DW013	DW013-protein852	852	Peptide deformylase	def	1.01	77	290	1
	DW047	DW047-protein246	246	*			272	773	1
	DW013	DW013-protein604	604	Elongation factor Tu	tuf	1	17	1202	1
	DW013	DW013-protein572	572	Uncharacterized protein MG233	MG233	1	1043	1343	1
	DW395	DW395-protein906	906	*			165	747	1
	DW433	DW433-protein1069	1069	*			132	519	0
	DW489	DW489-protein974	974	*			485	899	0
	DW119	DW119-protein256	256	Bifunctional protein FolD	folD	0.98	1135	1774	0
	DW013	DW013-protein36	36	Methionine--tRNA ligase	metG	0.99	2988	3225	1
	DW428	DW428-protein1002	1002	*			226	694	1
	DW027	DW027-protein444	444	Uncharacterized protein MG269	MG269	1	21922	22945	1
	DW382	DW382-protein1049	1049	*			23	263	0
	DW374	DW374-protein272	272	*			1782	2259	1
	DW148	DW148-protein1036	1036	*			284	731	0
	DW374	DW374-protein866	866	*			171	570	0
	M6604	M6604-protein939	939	*			235468	235780	1
	DW013	DW013-protein430	430	Uncharacterized lipoprotein MG309	MG309	1	1892	2702	1
	DW013	DW013-protein388	388	DNA topoisomerase 4 subunit A	parC	1.02	1216	1504	0
	DW013	DW013-protein461	461	Probable ATP-dependent 6-phosphofructokinase	pfkA	1	465	933	1
	DW148	DW148-protein970	970	*			1909	2326	0
	DW013	DW013-protein898	898	*			127	643	1
	DW013	DW013-protein83	83	Phosphomannomutase	manB	0.99	10896	11223	1
	DW013	DW013-protein50	50	Uncharacterized protein MG029	MG029	0.95	8361	8955	0
	DW013	DW013-protein735	735	Ribosome-binding factor A	rbfA	1	755	1094	1
	DW435	DW435-protein1032	1032	*			191	560	1
	DW292	DW292-protein940	940	*			813	1185	0
	DW374	DW374-protein273	273	*			2258	3629	1
	DW013	DW013-protein179	179	Uncharacterized lipoprotein MG040	MG040	1	3286	3883	1
	DW013	DW013-protein118	118	Small ribosomal subunit protein uS2	rpsB	1.02	9765	9981	0
	DW013	DW013-protein274	274	SsrA-binding protein	smpB	1	2897	3248	1
	DW047	DW047-protein272	272	*			207	606	1
	DW394	DW394-protein241	241	KfrA N-terminal DNA-binding domain-containing protein			17	245	1
	DW315	DW315-protein574	574	Uncharacterized protein MG428	MG428	1	107	551	1
	DW271	DW271-protein655	655	*			198	717	1
	DW013	DW013-protein271	271	Uncharacterized glycosyltransferase MG060	MG060	1	2027	2450	0
	DW370	DW370-protein597	597	*			1423	1837	0
	DW389	DW389-protein36	36	Bifunctional riboflavin kinase/FMN adenylyltransferase	ribF	0.92	22864	23722	1
	DW129	DW129-protein1016	1016	*			205	604	1
	DW391	DW391-protein1001	1001	*			785	1139	1
	DW396	DW396-protein969	969	*			46	541	0
	DW141	DW141-protein807	807	*			42	441	1
	DW108	DW108-protein890	890	*			6	819	1
	DW394	DW394-protein118	118	*			610	970	1
	DW013	DW013-protein327	327	Peptide chain release factor 1	prfA	1	2368	2974	0
	DW383	DW383-protein960	960	*			2687	3233	1
	DW166	DW166-protein847	847	Uncharacterized protein MG360	MG360	0.99	18269	18623	0
	DW373	DW373-protein1070	1070	*			3	246	0
	DW414	DW414-protein368	368	*			3346	3712	1
	DW292	DW292-protein1042	1042	*			32	395	0
	DW385	DW385-protein986	986	*			26	488	1
	DW391	DW391-protein1053	1053	*			9	399	0
	DW153	DW153-protein997	997	*			212	1028	1
	DW027	DW027-protein645	645	Uncharacterized glycosyltransferase MG025	MG025	0.99	112	766	1
	DW027	DW027-protein2	2	*			923	1301	1
	DW346	DW346-protein847	847	Mutator family transposase			128	1307	0
	DW013	DW013-protein950	950	*			28	400	1
	DW013	DW013-protein136	136	Type II methyltransferase M.MgeORF184P	MG184	1	434	1184	1
	DW292	DW292-protein979	979	*			346	790	1
	DW013	DW013-protein804	804	Acyl carrier protein homolog	MG287	0.88	543	828	1
	DW013	DW013-protein620	620	Uncharacterized protein MG461	MG461	1.01	1108	1867	0
	DW013	DW013-protein307	307	Cytadherence high molecular weight protein 2	hmw2	1.02	3067	3544	1
	DW013	DW013-protein398	398	Uridylate kinase	pyrH	0.99	3249	3981	0
	M6283	M6283-protein806	806	Uncharacterized lipoprotein MG260	MG260	0.97	463716	464886	1
	DW013	DW013-protein71	71	S-adenosylmethionine synthase	metK	1	4401	4917	1
	DW013	DW013-protein7	7	Elongation factor G	fusA	1	3398	5057	0
	DW330	DW330-protein999	999	*			99	552	1
	DW405	DW405-protein917	917	*			48	411	1
	DW304	DW304-protein912	912	Putative ABC transporter ATP-binding MG390	MG390	0.99	25	1000	1
	DW347	DW347-protein982	982	*			237	600	0
	DW013	DW013-protein935	935	Uncharacterized protein MG148	MG148	1.01	77	542	1
	DW395	DW395-protein837	837	*			840	1248	0
	DW013	DW013-protein19	19	Large ribosomal subunit protein uL1	rplA	1.01	9917	10244	0
	DW027	DW027-protein775	775	Uncharacterized lipoprotein MG395	MG395	0.98	2600	3377	1
	DW027	DW027-protein701	701	Uncharacterized protein MG012	MG012	1.01	14128	14344	1
	DW013	DW013-protein151	151	NADH oxidase	nox	1	891	1974	0
	DW392	DW392-protein983	983	*			395	884	0
	DW385	DW385-protein980	980	*			239	659	0
	DW027	DW027-protein71	71	Aspartyl/glutamyl-tRNA(Asn/Gln) amidotransferase subunit B	gatB	1	40162	41596	0
	DW373	DW373-protein979	979	*			0	726	1
	DW041	DW041-protein1029	1029	*			55	472	0
	DW374	DW374-protein8	8	phage head closure protein			6160	6475	1
	DW043	DW043-protein265	265	*			18	381	1
	DW390	DW390-protein1065	1065	*			48	339	1
	DW081	DW081-protein65	65	Peptide deformylase	def	1	40728	41052	1
	DW292	DW292-protein896	896	*			905	1295	1
	DW129	DW129-protein1047	1047	*			423	636	0
	DW395	DW395-protein306	306	*			10	868	1
	DW077	DW077-protein811	811	*			3587	4103	1
	DW123	DW123-protein959	959	*			511	874	1
	DW027	DW027-protein874	874	*			2158	2881	1
	DW124	DW124-protein661	661	Uncharacterized lipoprotein MG439	MG439	1	35202	35598	1
	DW013	DW013-protein202	202	Uncharacterized ATP-dependent helicase MG140	MG140	0.99	3833	4412	1
	DW419	DW419-protein233	233	*			153	369	1
	DW013	DW013-protein683	683	Small ribosomal subunit protein uS9	rpsI	1	1063	1462	1
	DW428	DW428-protein960	960	*			1272	1872	0
	DW013	DW013-protein158	158	Probable guanosine-3',5'-bis(diphosphate) 3'-pyrophosphohydrolase	spoT	0.99	5921	7310	1
	DW013	DW013-protein170	170	DNA primase	dnaG	1.03	6231	6474	1
	DW483	DW483-protein937	937	*			29	326	0
	DW347	DW347-protein1008	1008	*			9	378	0
	DW027	DW027-protein423	423	Probable guanosine-3',5'-bis(diphosphate) 3'-pyrophosphohydrolase	spoT	1.01	8951	9209	0
	DW085	DW085-protein1006	1006	*			224	593	1
	DW361	DW361-protein855	855	*			211	958	0
	DW436	DW436-protein991	991	*			467	1154	0
	DW027	DW027-protein68	68	Probable cell division protein WhiA	whiA	1	37852	38458	0
	DW368	DW368-protein335	335	hypothetical protein			33800	34064	1
	DW043	DW043-protein292	292	*			1137	1359	0
	DW013	DW013-protein943	943	*			8	389	1
	DW140	DW140-protein718	718	*			3959	4196	1
	DW013	DW013-protein96	96	Probable nicotinate-nucleotide adenylyltransferase/Ap4A hydrolase	MG240	1.01	5757	6102	0
	DW405	DW405-protein893	893	*			174	489	0
	DW349	DW349-protein883	883	*			86	443	1
	DW129	DW129-protein986	986	Transposase			1986	2352	0
	DW013	DW013-protein503	503	Uncharacterized HTH-type transcriptional regulator MG101	MG101	1	1550	2000	1
	DW166	DW166-protein581	581	Cytidylate kinase	cmk	1	23604	24153	0
	DW268	DW268-protein941	941	*			632	998	1
	DW047	DW047-protein141	141	*			76	817	0
	DW013	DW013-protein849	849	Uncharacterized protein MG353	MG353	1	27	342	1
	DW374	DW374-protein267	267	Bro-N domain-containing protein			64	472	1
	DW013	DW013-protein18	18	Peptidyl-tRNA hydrolase	pth	1	9348	9918	0
	DW027	DW027-protein796	796	*			7815	8064	1
	DW419	DW419-protein3	3	*			440	1970	1
	DW013	DW013-protein506	506	Uncharacterized protein MG181	MG181	0.99	523	940	1
	DW013	DW013-protein11	11	Small ribosomal subunit protein uS12	rpsL	1	5958	6378	0
	DW312	DW312-protein991	991	*			111	564	0
	DW013	DW013-protein369	369	Cytadherence high molecular weight protein 3	hmw3	0.98	1182	1785	0
	DW013	DW013-protein167	167	Glycine--tRNA ligase	glyQS	1	5294	5732	1
	DW390	DW390-protein1064	1064	Adhesin P1	mgpA	0.61	77	284	1
	DW451	DW451-protein977	977	*			578	785	1
	DW284	DW284-protein826	826	Organic hydroperoxide resistance protein-like	MG454	0.91	40	508	0
	DW013	DW013-protein513	513	*			1607	1865	1
	DW013	DW013-protein619	619	Uncharacterized protein MG461	MG461	1.01	736	1006	0
	DW283	DW283-protein832	832	*			468	720	1
	DW013	DW013-protein589	589	Enolase	eno	1.01	468	1212	1
	DW013	DW013-protein529	529	Membrane protein insertase YidC	yidC	0.99	468	783	0
	DW394	DW394-protein201	201	IS1 transposase			343	847	1
	DW140	DW140-protein983	983	*			45	288	0
	DW058	DW058-protein850	850	Adhesin P1	mgpA	0.75	518	1019	0
	DW027	DW027-protein204	204	Protein NrdI	nrdI	1	36300	36762	0
	DW013	DW013-protein542	542	Tyrosine--tRNA ligase	tyrS	0.94	2021	2420	0
	DW283	DW283-protein890	890	Cell wall-associated hydrolase			32	449	1
	DW436	DW436-protein1071	1071	*			74	476	0
	DW013	DW013-protein644	644	Large ribosomal subunit protein bL12	rplL	1	1037	1406	1
	DW304	DW304-protein3	3	*			534	870	1
	DW374	DW374-protein6	6	*			4689	5829	1
	DW039	DW039-protein424	424	Protein GrpE	grpE	0.99	238034	238688	1
	DW133	DW133-protein1002	1002	*			82	511	1
	DW355	DW355-protein823	823	*			1267	1960	0
	DW339	DW339-protein698	698	*			8070	8772	0
	DW013	DW013-protein784	784	Probable DNA helicase II homolog	uvrD	1	59	617	0
	DW266	DW266-protein384	384	Glycerol 3-phosphate oxidase	MG039	1	4653	4884	0
	DW013	DW013-protein342	342	Cell division protein FtsZ	ftsZ	0.99	992	1883	0
	DW013	DW013-protein199	199	Uncharacterized ATP-dependent helicase MG140	MG140	1.01	2579	2900	1
	DW419	DW419-protein204	204	*			4	388	1
	DW292	DW292-protein1026	1026	*			113	509	0
	DW013	DW013-protein671	671	Putative pre-16S rRNA nuclease	MG291.1	1	1313	1730	1
	DW013	DW013-protein358	358	Transketolase	tkt	1	2840	3692	1
	DW027	DW027-protein558	558	Uncharacterized protein MG315	MG315	1.01	3687	4017	0
	DW043	DW043-protein102	102	*			2678	2942	0
	DW371	DW371-protein995	995	*			82	301	1
	DW039	DW039-protein991	991	Uncharacterized protein MG414	MG414	1.02	1670	1922	1
	DW148	DW148-protein1037	1037	*			493	751	0
	DW446	DW446-protein1016	1016	*			175	424	0
	DW383	DW383-protein996	996	*			406	778	0
	DW077	DW077-protein812	812	*			4099	4465	1
	DW292	DW292-protein1003	1003	*			38	662	0
	DW013	DW013-protein216	216	Lipoprotein signal peptidase	lspA	1	5882	6221	0
	DW409	DW409-protein990	990	*			73	517	0
	DW405	DW405-protein845	845	*			265	790	1
	DW129	DW129-protein1019	1019	*			1290	1659	1
	DW374	DW374-protein145	145	*			5701	5953	1
	DW155	DW155-protein1016	1016	*			927	1374	1
	DW013	DW013-protein780	780	Uncharacterized protein MG285	MG285	0.99	244	478	1
	DW386	DW386-protein173	173	Integrase catalytic domain-containing protein			297	1083	1
	DW013	DW013-protein708	708	Acetate kinase	ackA	1.01	419	932	1
	DW129	DW129-protein1045	1045	*			51	834	1
	M6090	M6090-protein530	530	Uncharacterized ABC transporter permease MG064	MG064	1	305181	306285	1
	DW013	DW013-protein129	129	Serine--tRNA ligase	serS	0.98	6292	6856	1
	DW428	DW428-protein986	986	*			592	988	1
	DW269	DW269-protein905	905	Uncharacterized protein MG350	MG350	0.94	2	230	1
	DW055	DW055-protein933	933	*			230	473	0
	DW013	DW013-protein418	418	UvrABC system protein A	uvrA	1	1221	2856	0
	DW374	DW374-protein23	23	*			20395	21469	1
	DW375	DW375-protein918	918	*			5	905	1
	DW013	DW013-protein862	862	*			18	909	0
	DW368	DW368-protein1005	1005	*			65	539	1
	DW013	DW013-protein674	674	Uncharacterized protein MG459	MG459	0.98	440	749	1
	DW013	DW013-protein178	178	Uncharacterized lipoprotein MG040	MG040	1.03	2533	2809	1
	DW013	DW013-protein162	162	Cysteine--tRNA ligase	cysS	0.95	2840	3380	1
	DW398	DW398-protein900	900	*			4817	5201	0
	DW148	DW148-protein950	950	*			1912	2173	1
	DW155	DW155-protein1007	1007	Uncharacterized protein			201	702	0
	DW112	DW112-protein712	712	*			164	662	0
	DW112	DW112-protein1011	1011	*			73	448	0
	DW013	DW013-protein451	451	Uncharacterized protein MG121	MG121	0.99	1145	1568	0
	DW013	DW013-protein964	964	*			8	251	0
	DW055	DW055-protein952	952	*			32	389	0
	DW112	DW112-protein62	62	Uncharacterized lipoprotein MG095	MG095	0.99	36014	36443	1
	DW290	DW290-protein996	996	*			297	921	0
	DW385	DW385-protein33	33	hypothetical protein			16120	16336	1
	DW460	DW460-protein229	229	Uncharacterized protein MG120	MG120	1.01	34444	34768	1
	DW027	DW027-protein151	151	Uncharacterized protein MG255	MG255	0.91	6764	7505	0
	DW128	DW128-protein1012	1012	*			93	312	1
	DW027	DW027-protein723	723	Phosphate transport system permease protein PstA homolog	pstA	0.99	10886	11516	0
	DW097	DW097-protein817	817	*			312	852	0
	DW493	DW493-protein210	210	*			37	679	0
	DW013	DW013-protein321	321	Putative ABC transporter ATP-binding protein MG015	MG015	1.03	3190	3463	1
	DW013	DW013-protein515	515	Small ribosomal subunit protein uS13	rpsM	1	45	303	0
	DW027	DW027-protein21	21	NAD kinase	nadK	0.99	12651	13431	0
	M6280	M6280-protein748	748	Uncharacterized lipoprotein MG395	MG395	0.95	431940	432189	1
	DW148	DW148-protein1003	1003	*			73	520	0
	DW013	DW013-protein13	13	Phosphatidylglycerol--prolipoprotein diacylglyceryl transferase	lgt	1	6646	7453	0
	DW368	DW368-protein1035	1035	*			44	458	0
	DW043	DW043-protein377	377	*			64	298	1
	DW013	DW013-protein154	154	Uncharacterized protein MG277	MG277	1.02	3080	3767	0
	DW013	DW013-protein108	108	UvrABC system protein B	uvrB	0.99	2244	4215	0
	DW085	DW085-protein986	986	*			335	845	0
	DW342	DW342-protein755	755	*			284	599	1
	DW268	DW268-protein962	962	*			221	764	1
	DW382	DW382-protein993	993	*			87	702	0
	DW097	DW097-protein980	980	*			39	393	0
	DW129	DW129-protein1041	1041	*			562	1072	0
	DW292	DW292-protein975	975	*			347	743	1
	DW013	DW013-protein763	763	Uncharacterized lipoprotein MG338	MG338	1.01	183	540	0
	DW027	DW027-protein241	241	Uncharacterized protein MG211	MG211	1	61409	61808	0
	DW041	DW041-protein453	453	Protein translocase subunit SecA	secA	1	24910	27073	0
	DW359	DW359-protein583	583	*			1124	4106	1
	DW439	DW439-protein957	957	*			1360	1969	0
	DW481	DW481-protein978	978	*			5	239	1
	DW355	DW355-protein819	819	*			1423	2089	0
	DW043	DW043-protein425	425	*			124	448	0
	DW047	DW047-protein218	218	*			850	1063	0
	DW463	DW463-protein664	664	Peptide methionine sulfoxide reductase MsrA	msrA	1	27286	27583	1
	DW438	DW438-protein971	971	*			1556	2258	1
	DW374	DW374-protein297	297	*			4746	5040	0
	DW452	DW452-protein964	964	Uncharacterized protein MG422	MG422	1	638	1040	1
	DW027	DW027-protein526	526	L-lactate dehydrogenase	ldh	1	12375	13314	1
	DW351	DW351-protein775	775	*			54	465	1
	DW013	DW013-protein304	304	Uncharacterized ABC transporter permease MG468	MG468	1.02	4326	4680	1
	DW013	DW013-protein386	386	Putative esterase/lipase 1	MG310	0.99	3167	3581	0
	DW148	DW148-protein980	980	*			1132	1573	1
	DW462	DW462-protein948	948	*			138	531	1
	DW436	DW436-protein1048	1048	*			32	482	1
	DW013	DW013-protein440	440	Uncharacterized protein MG133	MG133	1	431	656	0
	DW397	DW397-protein593	593	*			198	597	1
	DW450	DW450-protein923	923	Putative ABC transporter ATP-binding protein MG187	MG187	0.99	3705	4707	0
	DW013	DW013-protein239	239	Dihydrolipoyl dehydrogenase	pdhD	1	1718	2732	0
	DW013	DW013-protein140	140	Uncharacterized lipoprotein MG185	MG185	1	2408	3593	1
	DW428	DW428-protein1005	1005	*			13	388	1
	DW096	DW096-protein1008	1008	*			54	462	1
	DW368	DW368-protein949	949	*			1348	1825	0
	DW027	DW027-protein199	199	Large ribosomal subunit protein bL27	rpmA	1	33122	33437	0
	DW292	DW292-protein919	919	*			138	531	0
	DW108	DW108-protein964	964	*			26	518	1
	DW013	DW013-protein710	710	*			153	540	1
	DW027	DW027-protein774	774	Uncharacterized lipoprotein MG395	MG395	0.96	1793	2150	1
	DW013	DW013-protein534	534	Large ribosomal subunit protein bL17	rplQ	1	1002	1329	0
	DW483	DW483-protein880	880	*			123	393	1
	DW013	DW013-protein72	72	hypothetical protein			5153	5411	1
	DW013	DW013-protein657	657	ATP synthase subunit c	atpE	1	935	1244	0
	DW397	DW397-protein956	956	*			47	455	1
	DW033	DW033-protein638	638	Uncharacterized protein MG389	MG389	0.98	27927	28257	1
	DW013	DW013-protein100	100	Uncharacterized protein MG241	MG241	1	7528	8017	1
	DW390	DW390-protein1004	1004	*			29	311	0
	DW397	DW397-protein884	884	*			135	786	0
	DW013	DW013-protein868	868	Elongation factor Ts	tsf	1.01	241	634	0
	DW013	DW013-protein206	206	Uncharacterized protein MG141.1	MG141.1	0.99	6087	6360	1
	DW058	DW058-protein973	973	*			10	379	1
	DW375	DW375-protein971	971	*			870	1230	0
	DW419	DW419-protein9	9	*			774	2595	1
	DW079	DW079-protein431	431	*			33823	34081	0
	DW043	DW043-protein38	38	*			882	1632	1
	DW355	DW355-protein822	822	*			831	1263	0
	DW140	DW140-protein969	969	Adhesin P1	mgpA	0.65	247	532	0
	M6604	M6604-protein77	77	*			47855	48131	0
	DW374	DW374-protein268	268	*			468	1230	1
	DW381	DW381-protein1027	1027	*			48	504	1
	DW443	DW443-protein1022	1022	*			235	610	0
	DW033	DW033-protein896	896	Probable ribosome biogenesis GTPase A	rbgA	1	32444	33257	1
	DW299	DW299-protein1021	1021	*			156	561	0
	DW129	DW129-protein992	992	*			1426	1924	1
	DW027	DW027-protein483	483	Putative ABC transporter ATP-binding protein MG303	MG303	1	12299	13373	0
	DW047	DW047-protein291	291	*			26	392	0
	DW419	DW419-protein145	145	*			93	327	0
	DW013	DW013-protein713	713	Uncharacterized protein MG279	MG279	0.99	577	1234	0
	DW292	DW292-protein959	959	*			167	665	0
	DW013	DW013-protein957	957	Oligopeptide transport system permease protein OppB	oppB	1	52	253	0
	DW436	DW436-protein1086	1086	*			38	329	0
	DW013	DW013-protein524	524	hypothetical protein			2611	2815	0
	DW279	DW279-protein329	329	tRNA-specific 2-thiouridylase MnmA	mnmA	0.98	17928	18345	1
	DW419	DW419-protein243	243	*			13	217	1
	DW085	DW085-protein1018	1018	*			194	407	1
	DW351	DW351-protein607	607	*			633	1749	0
	DW013	DW013-protein380	380	tRNA-specific 2-thiouridylase MnmA	mnmA	0.99	2727	2964	0
	DW354	DW354-protein939	939	*			940	1441	0
	DW382	DW382-protein997	997	*			131	386	1
	DW489	DW489-protein960	960	*			2016	2559	1
	DW375	DW375-protein1054	1054	*			83	287	0
	DW013	DW013-protein747	747	High affinity transport system protein p37	p37	1.03	67	280	1
	DW456	DW456-protein1004	1004	*			10	397	1
	DW268	DW268-protein974	974	*			2	518	0
	DW166	DW166-protein994	994	*			179	617	1
	DW439	DW439-protein936	936	*			10	265	0
	DW013	DW013-protein725	725	Thymidine kinase	tdk	0.99	943	1240	1
	DW374	DW374-protein901	901	*			142	421	0
	DW329	DW329-protein914	914	*			106	1408	0
	DW166	DW166-protein420	420	Uncharacterized protein MG447	MG447	0.93	21970	22912	0
	DW121	DW121-protein1010	1010	Uncharacterized protein			283	499	0
	DW359	DW359-protein873	873	*			809	1223	1
	DW081	DW081-protein955	955	tRNA (guanine-N(1)-)-methyltransferase	trmD	1	21819	22371	0
	DW013	DW013-protein362	362	Ribonuclease HIII	rnhC	1	2432	3140	1
	DW013	DW013-protein462	462	Pyruvate kinase	pyk	1	935	1799	1
	DW129	DW129-protein1056	1056	*			30	570	1
	DW033	DW033-protein24	24	*			15094	15406	0
	DW112	DW112-protein458	458	*			5395	5596	0
	DW013	DW013-protein79	79	Thymidine phosphorylase	deoA	1	8178	9102	1
	DW390	DW390-protein992	992	*			566	1052	0
	DW287	DW287-protein883	883	*			44	464	0
	DW013	DW013-protein801	801	Glutamate--tRNA ligase	gltX	1.01	281	779	1
	DW419	DW419-protein6	6	*			3492	4239	1
	DW027	DW027-protein930	930	Alanine--tRNA ligase	alaS	1.02	1648	2047	0
	DW435	DW435-protein936	936	*			6517	7240	0
	DW377	DW377-protein966	966	*			1730	2291	0
	DW013	DW013-protein407	407	Probable ABC transporter permease protein MG188	MG188	1	601	883	0
	DW077	DW077-protein1041	1041	*			7	412	0
	DW438	DW438-protein982	982	*			338	1265	1
	DW013	DW013-protein921	921	Small ribosomal subunit biogenesis GTPase RsgA	rsgA	1	35	563	1
	DW386	DW386-protein181	181	*			645	873	0
	DW395	DW395-protein1007	1007	*			8	242	0
	DW375	DW375-protein231	231	*			6809	7310	0
	DW292	DW292-protein1025	1025	*			30	489	1
	DW013	DW013-protein663	663	Dihydrofolate reductase	folA	1.01	910	1141	1
	DW387	DW387-protein1020	1020	*			243	636	0
	DW383	DW383-protein501	501	Uncharacterized protein MG366	MG366	1	33526	34009	1
	DW013	DW013-protein34	34	Methionine--tRNA ligase	metG	1.01	1686	1929	1
	DW041	DW041-protein1004	1004	*			95	500	0
	DW013	DW013-protein166	166	Glycine--tRNA ligase	glyQS	1	4901	5129	1
	M6090	M6090-protein683	683	*			2516	2807	0
	DW013	DW013-protein459	459	*			2177	2633	0
	DW013	DW013-protein365	365	Translation initiation factor IF-3	infC	1	3670	4216	0
	DW148	DW148-protein998	998	*			55	421	1
	DW013	DW013-protein509	509	Oligoendopeptidase F homolog	pepF	0.99	2331	2688	1
	DW392	DW392-protein860	860	*			4495	5074	1
	DW013	DW013-protein9	9	Elongation factor G	fusA	1.03	5249	5465	0
	DW449	DW449-protein412	412	Uncharacterized protein MG096	MG096	0.97	34571	36227	1
	DW013	DW013-protein404	404	Uncharacterized protein MG349	MG349	1.01	2936	3179	0
	DW419	DW419-protein5	5	*			2537	3503	1
	DW027	DW027-protein53	53	Glucose-6-phosphate isomerase	pgi	1	30007	30763	0
	DW334	DW334-protein996	996	*			1690	2095	0
	DW077	DW077-protein809	809	*			2477	3383	1
	DW079	DW079-protein918	918	*			1710	2097	0
	DW013	DW013-protein595	595	Large ribosomal subunit protein uL3	rplC	1	1353	1731	0
	DW043	DW043-protein144	144	*			2028	2460	0
	DW013	DW013-protein368	368	Uncharacterized protein MG316	MG316	0.99	281	653	0
	M2341	M2341-protein479	479	Uncharacterized lipoprotein MG412	MG412	0.95	288294	288615	0
	DW374	DW374-protein150	150	*			8175	8565	1
	DW409	DW409-protein944	944	*			24	570	1
	DW349	DW349-protein401	401	*			669	1227	1
	DW303	DW303-protein45	45	*			23697	23898	0
	DW013	DW013-protein91	91	Trigger factor	tig	1	1373	2597	1
	DW309	DW309-protein938	938	*			125	734	0
	DW374	DW374-protein11	11	*			7302	7917	1
	DW405	DW405-protein756	756	*			75	1278	0
	DW148	DW148-protein978	978	ORF6N domain-containing protein			1146	1701	0
	DW013	DW013-protein190	190	Probable cytosol aminopeptidase	pepA	0.99	2613	3669	0
	DW013	DW013-protein219	219	Uncharacterized protein MG432	MG432	1.02	737	1013	1
	DW027	DW027-protein820	820	Uncharacterized protein MG422	MG422	1.03	6001	6265	0
	DW413	DW413-protein940	940	*			893	1307	1
	DW013	DW013-protein210	210	Heat-inducible transcription repressor HrcA	hrcA	1.01	1075	1870	0
	DW392	DW392-protein1071	1071	*			26	230	0
	DW013	DW013-protein213	213	Putative metallophosphoesterase MG207	MG207	0.97	3838	4183	1
	DW423	DW423-protein995	995	*			252	552	1
	DW428	DW428-protein1012	1012	Uncharacterized protein			16	310	1
	DW027	DW027-protein273	273	Uncharacterized lipoprotein MG068	MG068	1	10227	11652	0
	DW462	DW462-protein969	969	*			492	981	0
	DW027	DW027-protein875	875	*			3035	4772	1
	DW292	DW292-protein1002	1002	*			98	542	1
	DW013	DW013-protein311	311	*			1029	1314	0
	DW394	DW394-protein119	119	*			1158	1548	0
	DW284	DW284-protein563	563	P32 adhesin	MG318	0.98	1853	2237	0
	DW013	DW013-protein21	21	Large ribosomal subunit protein uL11	rplK	1	10597	11011	0
	DW375	DW375-protein993	993	*			180	648	0
	DW013	DW013-protein294	294	Uncharacterized protein MG268	MG268	1.01	3373	3574	0
	DW307	DW307-protein979	979	*			375	792	1
	DW013	DW013-protein806	806	Uncharacterized ATP-dependent helicase MG018	MG018	1	640	1075	0
	DW374	DW374-protein148	148	*			7127	7682	1
	DW273	DW273-protein387	387	*			136	367	1
	DW013	DW013-protein23	23	Oligopeptide transport ATP-binding protein OppF	oppF	1	12263	13613	0
	DW077	DW077-protein949	949	*			1280	1670	1
	DW013	DW013-protein348	348	DegV domain-containing protein MG326	MG326	1.01	1556	1949	1
	DW013	DW013-protein626	626	DNA polymerase III subunit alpha	dnaE	0.99	682	1795	0
	DW402	DW402-protein1014	1014	*			231	606	0
	DW013	DW013-protein235	235	Glutamyl-tRNA(Gln) amidotransferase subunit A	gatA	1	5167	5719	1
	DW065	DW065-protein390	390	Adhesin P1	mgpA	0.78	215267	215801	1
	DW369	DW369-protein922	922	*			116	638	1
	DW487	DW487-protein808	808	*			19	694	1
	DW443	DW443-protein903	903	*			508	727	1
	DW027	DW027-protein197	197	Uncharacterized protein MG236	MG236	1	31842	32265	0
	DW436	DW436-protein1036	1036	*			264	618	0
	DW374	DW374-protein143	143	*			4953	5301	1
	DW155	DW155-protein1002	1002	*			1844	2270	0
	DW043	DW043-protein42	42	*			6010	6364	0
	M6312	M6312-protein631	631	*			44281	44515	0
	DW013	DW013-protein181	181	Phosphocarrier protein HPr	ptsH	1	4329	4596	1
	DW339	DW339-protein78	78	*			46081	46312	1
	DW493	DW493-protein67	67	*			47	917	1
	DW013	DW013-protein63	63	Spermidine/putrescine transport system permease protein PotB homolog	potB	0.98	301	796	1
	DW420	DW420-protein955	955	*			509	746	0
	DW097	DW097-protein953	953	*			29	407	1
	DW292	DW292-protein1009	1009	*			131	548	1
	DW353	DW353-protein229	229	*			1177	1414	0
	DW013	DW013-protein548	548	Uncharacterized protein MG449	MG449	1	2365	2767	0
	DW013	DW013-protein121	121	DnaJ-like protein MG002	MG002	1	826	1072	1
	DW129	DW129-protein989	989	*			2933	3572	0
	DW123	DW123-protein1023	1023	*			81	306	0
	DW013	DW013-protein510	510	PTS system glucose-specific EIICBA component	ptsG	1	574	976	0
	DW419	DW419-protein10	10	*			3126	3528	1
	DW027	DW027-protein694	694	Putative ABC transporter ATP-binding protein MG015	MG015	1.01	9318	9675	0
	DW013	DW013-protein113	113	Probable cation-transporting P-type ATPase	pacL	1.01	7013	7454	0
	DW013	DW013-protein101	101	Uncharacterized protein MG242	MG242	1.01	8022	8703	1
	DW013	DW013-protein66	66	Uncharacterized lipoprotein MG045	MG045	1.02	1642	1927	1
	DW013	DW013-protein68	68	tRNA N6-adenosine threonylcarbamoyltransferase	tsaD	1.01	3095	3710	1
	DW395	DW395-protein778	778	*			340	754	0
	DW055	DW055-protein921	921	*			55	508	0
	M6604	M6604-protein404	404	Uncharacterized protein MG131	MG131	0.84	241034	241355	0
	DW013	DW013-protein378	378	Uncharacterized protein MG294	MG294	1.01	1857	2076	0
	DW039	DW039-protein53	53	Uncharacterized protein MG028	MG028	0.7	30333	30576	1
	DW055	DW055-protein667	667	*			1609	2119	0
	DW013	DW013-protein441	441	Uncharacterized protein MG134	MG134	1	675	978	1
	DW292	DW292-protein970	970	*			246	621	1
	DW013	DW013-protein392	392	Putative type I specificity subunit S.MgeORF438P	MG438	1	333	885	0
	DW013	DW013-protein114	114	Probable cation-transporting P-type ATPase	pacL	1.01	7493	7988	0
	DW013	DW013-protein191	191	Chaperonin GroEL	groEL	1	3685	5317	0
	DW027	DW027-protein452	452	Putative phosphatase MG265	MG265	1	26560	27397	1
	DW041	DW041-protein1009	1009	*			106	556	0
	DW397	DW397-protein898	898	*			212	752	0
	DW013	DW013-protein295	295	Uncharacterized protein MG268	MG268	1	3670	4048	0
	DW013	DW013-protein614	614	Phenylalanine--tRNA ligase beta subunit	pheT	1.01	544	772	0
	DW402	DW402-protein1077	1077	*			41	419	0
	DW043	DW043-protein396	396	*			104	464	0
	DW013	DW013-protein565	565	Probable 1-acyl-sn-glycerol-3-phosphate acyltransferase	plsC	0.99	1154	1742	0
	DW268	DW268-protein916	916	*			134	629	0
	DW430	DW430-protein974	974	*			378	1047	1
	DW283	DW283-protein782	782	*			727	1135	0
	DW013	DW013-protein536	536	DNA-directed RNA polymerase subunit alpha	rpoA	1.02	2043	2373	0
	DW027	DW027-protein982	982	Uncharacterized protein			494	986	0
	DW041	DW041-protein1027	1027	*			110	473	0
	DW081	DW081-protein150	150	Transketolase	tkt	0.98	94146	95208	0
	DW392	DW392-protein967	967	*			626	1076	1
	DW013	DW013-protein78	78	Deoxyribose-phosphate aldolase	deoC	0.99	7520	8192	1
	DW438	DW438-protein1007	1007	*			269	704	1
	DW013	DW013-protein669	669	Alanine--tRNA ligase	alaS	1.01	420	708	1
	DW013	DW013-protein131	131	Serine--tRNA ligase	serS	1.02	7294	7546	1
	DW402	DW402-protein1081	1081	*			10	376	1
	DW278	DW278-protein764	764	*			847	1213	0
	DW355	DW355-protein273	273	*			16	256	1
	DW488	DW488-protein520	520	Purine nucleoside phosphorylase DeoD-type	deoD	0.89	27752	28547	0
	M6280	M6280-protein939	939	Uncharacterized lipoprotein MG309	MG309	0.99	545438	547046	1
	DW013	DW013-protein530	530	Membrane protein insertase YidC	yidC	0.99	801	1230	0
	DW077	DW077-protein948	948	*			2730	2958	0
	DW013	DW013-protein112	112	*			6750	6978	1
	DW013	DW013-protein152	152	NADH oxidase	nox	1	1983	2328	0
	DW013	DW013-protein17	17	tRNA(Ile)-lysidine synthase	tilS	1.01	9143	9356	0
	DW027	DW027-protein883	883	Arginine--tRNA ligase	argS	1	3801	4242	1
	DW283	DW283-protein858	858	Uncharacterized protein			99	567	1
	DW349	DW349-protein785	785	*			774	1350	0
	DW013	DW013-protein960	960	*			117	318	0
	DW360	DW360-protein962	962	*			551	947	1
	DW430	DW430-protein966	966	*			213	861	1
	DW330	DW330-protein998	998	*			157	718	0
	DW355	DW355-protein818	818	*			396	1062	0
	DW296	DW296-protein834	834	Valine--tRNA ligase	valS	0.99	1399	1837	0
	DW013	DW013-protein847	847	Uncharacterized ATP-dependent helicase MG018	MG018	1.02	123	495	1
	DW148	DW148-protein1046	1046	*			31	403	1
	DW429	DW429-protein990	990	*			488	896	0
	DW380	DW380-protein950	950	High affinity transport system protein p37	p37	0.98	4754	5210	0
	DW013	DW013-protein250	250	Large ribosomal subunit protein uL24	rplX	0.98	1722	2049	1
	DW027	DW027-protein1001	1001	hypothetical protein			157	388	1
	DW391	DW391-protein960	960	*			557	1232	0
	DW027	DW027-protein689	689	Uncharacterized ATP-dependent helicase MG018	MG018	1	6432	6984	0
	DW329	DW329-protein974	974	*			42	285	0
	DW013	DW013-protein860	860	Segregation and condensation protein B	scpB	1	260	884	1
	DW440	DW440-protein731	731	*			72	465	0
	DW027	DW027-protein537	537	Putative ABC transporter ATP-binding protein MG467	MG467	1	18437	18980	0
	DW375	DW375-protein898	898	*			1944	2220	0
	DW148	DW148-protein1040	1040	Transposase			213	522	0
	DW013	DW013-protein759	759	DNA primase	dnaG	0.99	684	885	1
	DW427	DW427-protein770	770	Uncharacterized protein MG319	MG319	0.98	573	1113	0
	DW013	DW013-protein476	476	Glucose-6-phosphate isomerase	pgi	1	776	1151	1
	DW013	DW013-protein117	117	Small ribosomal subunit protein uS2	rpsB	1.01	9228	9507	0
	DW292	DW292-protein977	977	*			402	897	0
	DW013	DW013-protein306	306	Cytadherence high molecular weight protein 2	hmw2	1	2053	2995	1
	DW047	DW047-protein117	117	Conserved protein			1665	2136	0
	DW436	DW436-protein968	968	*			25	913	1
	DW112	DW112-protein428	428	Uncharacterized protein MG147	MG147	0.98	11686	12343	1
	DW386	DW386-protein285	285	Small ribosomal subunit protein uS9			3	396	0
	DW372	DW372-protein982	982	*			2	221	0
	DW041	DW041-protein1013	1013	*			69	378	0
	DW419	DW419-protein18	18	*			1450	1954	1
	M6475	M6475-protein608	608	Uncharacterized protein MG320	MG320	1	350472	350766	1
	DW370	DW370-protein917	917	*			25	277	1
	DW013	DW013-protein226	226	Phosphoenolpyruvate-protein phosphotransferase	ptsI	1.01	5039	5270	1
	DW392	DW392-protein985	985	*			8	824	1
	DW013	DW013-protein826	826	Proline--tRNA ligase	proS	1.01	71	398	1
	DW383	DW383-protein999	999	*			349	811	0
	DW155	DW155-protein1014	1014	*			62	608	0
	DW013	DW013-protein897	897	Uncharacterized protein MG320	MG320	1	11	464	1
	DW013	DW013-protein204	204	Transcription termination/antitermination protein NusA	nusA	1.02	5218	5608	1
	DW389	DW389-protein1044	1044	*			27	441	1
	DW439	DW439-protein1027	1027	*			22	235	0
	DW311	DW311-protein290	290	*			3595	3799	0
	DW290	DW290-protein527	527	Uncharacterized lipoprotein MG149	MG149	0.97	25352	26093	0
	DW027	DW027-protein997	997	*			389	719	0
	DW166	DW166-protein960	960	*			5	479	1
	DW013	DW013-protein361	361	DnaJ-like protein MG200	MG200	1.01	1819	2386	0
	DW013	DW013-protein496	496	Probable protein-export membrane protein SecG	secG	1	2490	2724	0
	DW013	DW013-protein253	253	Small ribosomal subunit protein uS8	rpsH	0.99	2778	3204	1
	DW027	DW027-protein37	37	Putative carbohydrate transport ATP-binding protein MG119	MG119	1	22207	22588	0
	DW371	DW371-protein97	97	Putative carbohydrate transport ATP-binding protein MG119	MG119	1	57304	58468	1
	DW013	DW013-protein606	606	DegV domain-containing protein MG450	MG450	1	1804	2074	1
	DW153	DW153-protein1001	1001	*			548	749	0
	DW096	DW096-protein107	107	Adhesin P1	mgpA	0.89	1452	1815	0
	DW013	DW013-protein6	6	Small ribosomal subunit protein bS6	rpsF	1	2876	3347	0
	DW047	DW047-protein45	45	*			2471	3068	0
	DW458	DW458-protein969	969	*			1350	1746	1
	DW013	DW013-protein464	464	Uncharacterized protein MG306	MG306	1.02	254	527	1
	DW141	DW141-protein464	464	*			2411	2699	1
	DW401	DW401-protein770	770	*			88	460	1
	DW371	DW371-protein960	960	*			12	1170	1
	DW013	DW013-protein625	625	DNA polymerase III subunit alpha	dnaE	1.01	166	610	0
	DW050	DW050-protein129	129	Adhesin P1	mgpA	0.64	35	323	1
	DW374	DW374-protein481	481	*			158	611	1
	DW429	DW429-protein1080	1080	*			74	278	1
	DW278	DW278-protein492	492	Spermidine/putrescine import ATP-binding protein PotA	potA	0.96	16	454	1
	DW027	DW027-protein808	808	GTPase Obg	obg	1	5958	6939	1
	DW374	DW374-protein25	25	*			22811	23489	0
	DW027	DW027-protein205	205	Ribonucleoside-diphosphate reductase subunit beta	nrdF	1	36765	37437	0
	DW279	DW279-protein971	971	*			29	332	1
	DW405	DW405-protein570	570	*			2691	3132	1
	DW436	DW436-protein944	944	*			2	464	1
	DW129	DW129-protein1014	1014	*			121	589	0
	DW443	DW443-protein1008	1008	*			2	494	0
	DW318	DW318-protein987	987	*			45	501	1
	DW392	DW392-protein1041	1041	*			72	414	0
	DW013	DW013-protein622	622	Large ribosomal subunit protein uL22	rplV	1	668	1103	0
	DW013	DW013-protein353	353	Putative Xaa-Pro aminopeptidase	pepP	1	3008	3656	1
	DW373	DW373-protein1060	1060	*			27	270	0
	DW374	DW374-protein14	14	*			8586	12996	1
	DW374	DW374-protein26	26	*			23636	23876	1
	DW382	DW382-protein931	931	*			346	793	1
	DW121	DW121-protein1002	1002	*			1425	1995	1
	DW097	DW097-protein951	951	Adhesin P1	mgpA	0.65	2	296	1
	DW443	DW443-protein744	744	Uncharacterized metal-dependent hydrolase MG009	MG009	0.98	1530	2187	0
	DW033	DW033-protein425	425	DNA-directed RNA polymerase subunit beta	rpoB	1	24541	27238	1
	DW148	DW148-protein993	993	*			969	1479	1
	DW438	DW438-protein1055	1055	*			12	366	0
	DW013	DW013-protein349	349	DegV domain-containing protein MG326	MG326	1	1949	2444	1
	DW346	DW346-protein791	791	*			1073	1454	0
	DW322	DW322-protein788	788	*			73	580	0
	DW027	DW027-protein635	635	Phenylalanine--tRNA ligase beta subunit	pheT	1	11263	11908	0
	DW013	DW013-protein249	249	Large ribosomal subunit protein uL14	rplN	1	1354	1723	1
	DW295	DW295-protein992	992	*			146	662	1
	DW268	DW268-protein969	969	*			39	453	0
	DW425	DW425-protein1011	1011	*			100	460	1
	DW394	DW394-protein55	55	*			1833	2205	0
	DW033	DW033-protein703	703	ABC transport system permease protein p69	p69	1	32274	32769	0
	DW081	DW081-protein999	999	*			32	425	0
	DW483	DW483-protein893	893	*			49	784	0
	DW374	DW374-protein16	16	*			13747	16834	1
	DW039	DW039-protein502	502	Probable DNA helicase II homolog	uvrD	1	291028	291505	1
	DW013	DW013-protein10	10	Small ribosomal subunit protein uS7	rpsG	1	5474	5942	0
	DW391	DW391-protein1022	1022	*			69	564	1
	DW077	DW077-protein1000	1000	*			149	845	0
	DW013	DW013-protein421	421	5'-3' exonuclease	polA	1	479	1235	1
	DW443	DW443-protein454	454	*			384	780	1
	DW013	DW013-protein474	474	*			2284	3217	0
	DW097	DW097-protein843	843	*			271	922	1
	DW141	DW141-protein742	742	*			3	513	1
	DW027	DW027-protein77	77	Uracil-DNA glycosylase	ung	1.01	44596	44824	0
	DW425	DW425-protein942	942	*			35	344	1
	DW043	DW043-protein427	427	Uncharacterized protein			103	331	0
	DW027	DW027-protein116	116	Uncharacterized protein MG075	MG075	0.99	67095	69492	0
	DW013	DW013-protein41	41	Ribosome-binding ATPase YchF	ychF	0.98	4564	5452	1
	DW027	DW027-protein338	338	Oligoendopeptidase F homolog	pepF	1	4505	5150	0
	M6283	M6283-protein735	735	*			425282	425492	0
	DW013	DW013-protein319	319	Putative ABC transporter ATP-binding protein MG014	MG014	1.02	2214	2646	1
	DW148	DW148-protein1031	1031	*			117	582	1
	DW307	DW307-protein217	217	*			219	459	1
	DW085	DW085-protein1001	1001	*			667	1111	0
	DW381	DW381-protein1023	1023	*			96	501	0
	DW129	DW129-protein996	996	*			2196	2715	1
	DW148	DW148-protein1016	1016	*			104	458	0
	DW394	DW394-protein117	117	hypothetical protein			170	470	0
	DW013	DW013-protein57	57	DNA polymerase III PolC-type	polC	0.99	11653	12328	0
	DW355	DW355-protein931	931	*			410	788	0
	DW033	DW033-protein966	966	Uncharacterized protein MG415	MG415	1.01	996	1641	0
	DW027	DW027-protein216	216	Uncharacterized protein MG225	MG225	1.01	42225	42513	0
	DW081	DW081-protein237	237	DNA polymerase III PolC-type	polC	1.04	141200	141737	1
	DW013	DW013-protein562	562	Putative serine/threonine-protein kinase	MG109	1	1303	2227	1
	DW381	DW381-protein1032	1032	*			5	440	1
	DW013	DW013-protein107	107	Uncharacterized protein MG074	MG074	1	2035	2242	0
	DW013	DW013-protein161	161	DNA ligase	ligA	1	1657	2854	1
	DW013	DW013-protein877	877	Processive diacylglycerol beta-glycosyltransferase	MG335.2	1	584	791	1
	DW013	DW013-protein681	681	Large ribosomal subunit protein uL13	rplM	1	617	848	1
	DW315	DW315-protein195	195	Proline-rich P65 protein homolog	MG217	0.94	7973	9239	1
	DW013	DW013-protein448	448	*			1422	1938	0
	DW299	DW299-protein1016	1016	*			396	789	0
	DW097	DW097-protein905	905	Uncharacterized protein			199	658	0
	DW013	DW013-protein60	60	DNA polymerase III PolC-type	polC	1.01	13120	13414	0
	DW382	DW382-protein1046	1046	*			34	253	0
	DW013	DW013-protein456	456	Uncharacterized protein MG120	MG120	1.01	2905	3346	0
	DW454	DW454-protein618	618	Uncharacterized protein MG397	MG397	0.99	20187	20985	0
	DW443	DW443-protein1090	1090	*			49	259	1
	DW027	DW027-protein344	344	Uncharacterized protein MG181	MG181	1.02	7900	8236	0
	DW033	DW033-protein976	976	Uncharacterized protein MG422	MG422	1	7558	7828	0
	DW273	DW273-protein692	692	*			64	418	1
	DW374	DW374-protein5	5	HK97 family phage prohead protease			4127	4688	1
	DW013	DW013-protein268	268	Major facilitator superfamily transporter MG061	MG061	1.01	315	549	1
	DW172	DW172-protein1018	1018	*			72	441	0
	DW410	DW410-protein904	904	*			17	509	1
	DW129	DW129-protein1043	1043	*			235	745	1
	DW079	DW079-protein999	999	*			279	636	0
	DW027	DW027-protein473	473	Chromosome partition protein Smc	smc	1	4955	5792	0
	DW148	DW148-protein987	987	*			182	554	1
	DW085	DW085-protein975	975	*			2399	2957	1
	DW013	DW013-protein947	947	*			2	386	0
	DW129	DW129-protein1044	1044	*			206	605	1
	DW376	DW376-protein368	368	ATP synthase gamma chain	atpG	1	24341	24755	0
	DW481	DW481-protein961	961	*			682	919	0
	DW013	DW013-protein385	385	Small ribosomal subunit protein uS4	rpsD	1	2366	2963	1
	DW148	DW148-protein979	979	*			2376	2778	0
	DW430	DW430-protein993	993	*			246	492	1
	DW409	DW409-protein248	248	Uncharacterized ABC transporter permease MG468	MG468	0.98	20815	22552	0
	DW377	DW377-protein1016	1016	*			89	290	1
	DW414	DW414-protein914	914	Secreted protein			117	528	0
	DW013	DW013-protein508	508	Oligoendopeptidase F homolog	pepF	1.01	1656	2301	1
	DW013	DW013-protein357	357	Putative ABC transporter ATP-binding protein MG065	MG065	1.01	2147	2831	1
	DW027	DW027-protein619	619	DNA topoisomerase 4 subunit A	parC	1	1138	3151	0
	DW033	DW033-protein989	989	*			161	590	0
	DW013	DW013-protein95	95	Probable nicotinate-nucleotide adenylyltransferase/Ap4A hydrolase	MG240	1.01	5331	5733	0
	DW013	DW013-protein490	490	UPF0053 protein MG146	MG146	0.99	1728	2124	1
	DW409	DW409-protein937	937	*			40	580	1
	DW013	DW013-protein310	310	Protein P200	MG386	1.02	235	730	1
	DW013	DW013-protein796	796	DNA topoisomerase 1	topA	1.05	951	1263	1
	DW013	DW013-protein325	325	Uncharacterized protein MG259	MG259	1.01	1885	2161	0
	DW419	DW419-protein90	90	*			180	402	1
	DW287	DW287-protein728	728	*			30	390	0
	DW124	DW124-protein986	986	*			2224	2683	1
	DW013	DW013-protein344	344	Ribosomal RNA small subunit methyltransferase H	rsmH	1	3122	4052	0
	DW405	DW405-protein943	943	*			82	292	0
	DW292	DW292-protein907	907	*			1222	1666	1
	DW370	DW370-protein546	546	*			305	4151	0
	DW013	DW013-protein494	494	Ribonuclease R	rnr	0.99	907	2194	0
	DW166	DW166-protein3	3	Uncharacterized lipoprotein MG067	MG067	1	2050	2368	0
	DW359	DW359-protein558	558	*			419	959	1
	DW013	DW013-protein221	221	Triosephosphate isomerase	tpiA	1	1297	1786	1
	DW133	DW133-protein953	953	*			1573	2101	0
	DW309	DW309-protein999	999	*			28	472	1
	DW337	DW337-protein759	759	*			77	335	1
	DW394	DW394-protein82	82	hypothetical protein			480	1113	0
	DW043	DW043-protein424	424	*			11	389	1
	DW027	DW027-protein530	530	Glutamate--tRNA ligase	gltX	0.99	14769	14991	0
	DW483	DW483-protein890	890	*			411	798	1
	DW292	DW292-protein1007	1007	*			128	500	0
	DW027	DW027-protein557	557	Uncharacterized protein MG315	MG315	1	3123	3588	0
	DW027	DW027-protein973	973	*			137	497	1
	DW013	DW013-protein691	691	FKSG49			287	662	1
	DW013	DW013-protein266	266	Chromosome partition protein Smc	smc	0.99	3470	3920	1
	DW436	DW436-protein998	998	*			259	721	0
	DW013	DW013-protein262	262	Glyceraldehyde-3-phosphate dehydrogenase	gapA	1	37	1051	1
	DW488	DW488-protein903	903	*			7863	8064	0
	DW121	DW121-protein1003	1003	*			2035	2371	1
	DW370	DW370-protein586	586	*			1043	1655	0
	DW027	DW027-protein794	794	DNA-directed RNA polymerase subunit beta'	rpoC	1.01	3735	5781	1
	DW013	DW013-protein52	52	DNA polymerase III PolC-type	polC	0.99	9577	10039	0
	DW077	DW077-protein996	996	*			470	806	1
	DW432	DW432-protein976	976	*			317	1370	0
	DW027	DW027-protein234	234	Probable ATP-dependent 6-phosphofructokinase	pfkA	1.01	57765	58185	0
	DW013	DW013-protein793	793	*			736	1261	0
	DW013	DW013-protein454	454	Uncharacterized protein MG120	MG120	1.01	2296	2725	0
	DW374	DW374-protein21	21	hypothetical protein			19707	20034	1
	DW419	DW419-protein194	194	*			92	461	1
	DW428	DW428-protein989	989	*			179	548	0
	DW167	DW167-protein984	984	*			640	1009	0
	DW085	DW085-protein994	994	*			392	755	0
	DW013	DW013-protein84	84	Phosphomannomutase	manB	1	11277	11496	1
	DW013	DW013-protein899	899	*			243	447	1
	DW374	DW374-protein15	15	*			12995	13754	1
	DW389	DW389-protein946	946	*			577	1237	1
	DW414	DW414-protein817	817	*			608	1175	0
	DW027	DW027-protein265	265	*			7555	7771	0
	DW374	DW374-protein800	800	*			488	779	1
	DW155	DW155-protein1017	1017	*			392	848	1
	DW013	DW013-protein67	67	Uncharacterized lipoprotein MG045	MG045	0.98	2173	3007	1
	DW389	DW389-protein602	602	*			4594	5011	0
	DW365	DW365-protein650	650	*			1327	1846	1
	DW166	DW166-protein558	558	Cytadherence high molecular weight protein 3	hmw3	1	5559	6705	0
	DW148	DW148-protein1033	1033	*			218	590	0
	DW013	DW013-protein446	446	Lysine--tRNA ligase	lysS	1.01	2779	3313	1
	DW013	DW013-protein20	20	Large ribosomal subunit protein uL1	rplA	1	10280	10598	0
	DW043	DW043-protein423	423	*			51	498	0
	DW398	DW398-protein1052	1052	*			17	377	0
	DW428	DW428-protein962	962	*			396	1821	0
	DW397	DW397-protein881	881	*			10	1102	1
	DW013	DW013-protein435	435	Glycerol-3-phosphate acyltransferase	plsY	1.02	1840	2077	1
	DW013	DW013-protein106	106	Uncharacterized protein MG243	MG243	1	10226	10598	1
	DW013	DW013-protein14	14	HPr kinase/phosphorylase	hprK	1	7547	8483	0
	DW013	DW013-protein719	719	Uncharacterized lipoprotein MG307	MG307	1	1225	1657	1
	DW013	DW013-protein623	623	Small ribosomal subunit protein uS19	rpsS	1	1105	1369	0
	DW487	DW487-protein563	563	Mgp-operon protein 3	MG192	0.93	293	716	1
	DW419	DW419-protein4	4	hypothetical protein			2079	2550	1
	DW374	DW374-protein22	22	*			20027	20402	1
	DW013	DW013-protein188	188	Putative ABC transporter ATP-binding MG390	MG390	1.02	1924	2218	0
	DW299	DW299-protein1012	1012	*			363	771	1
	DW148	DW148-protein1015	1015	*			195	603	1
	DW374	DW374-protein138	138	*			199	1543	1
	DW013	DW013-protein444	444	Lysine--tRNA ligase	lysS	0.99	1840	2269	1
	DW369	DW369-protein1016	1016	*			114	489	1
	DW027	DW027-protein384	384	Uncharacterized protein MG147	MG147	1.02	27560	27812	0
	DW387	DW387-protein1049	1049	*			179	506	0
	DW462	DW462-protein1028	1028	*			6	258	1
	DW013	DW013-protein189	189	Probable cytosol aminopeptidase	pepA	1.01	2325	2559	0
	DW013	DW013-protein255	255	Large ribosomal subunit protein uL18	rplR	0.89	3724	4114	1
	DW433	DW433-protein1066	1066	*			108	525	1
	DW027	DW027-protein355	355	Protein translocase subunit SecY	secY	1	13786	15214	0
	DW050	DW050-protein951	951	Uncharacterized protein MG406	MG406	0.99	2081	2423	0
	DW398	DW398-protein987	987	*			588	1002	0
	DW013	DW013-protein560	560	Putative protein phosphatase	MG108	1.04	536	752	1
	DW414	DW414-protein923	923	*			124	571	0
	DW013	DW013-protein187	187	Putative ABC transporter ATP-binding MG390	MG390	0.99	844	1525	0
	DW041	DW041-protein1015	1015	*			14	377	1
	DW133	DW133-protein937	937	*			2017	2398	0
	DW278	DW278-protein881	881	*			101	320	1
	DW013	DW013-protein477	477	Ribulose-phosphate 3-epimerase	rpe	0.99	1254	1884	1
	DW148	DW148-protein977	977	*			127	712	1
	DW013	DW013-protein223	223	Phosphoenolpyruvate-protein phosphotransferase	ptsI	1	3551	4271	1
	DW377	DW377-protein993	993	*			56	746	0
	DW428	DW428-protein968	968	*			829	1579	0
	DW458	DW458-protein942	942	*			2282	3230	0
	DW372	DW372-protein980	980	Uncharacterized protein			660	1119	1
	DW050	DW050-protein1006	1006	*			165	657	1
	DW013	DW013-protein749	749	Probable ABC transporter ATP-binding protein p29	p29	1.01	551	884	1
	DW013	DW013-protein197	197	Uncharacterized ATP-dependent helicase MG140	MG140	1.01	1310	1601	1
	DW013	DW013-protein817	817	Uncharacterized lipoprotein MG338	MG338	1.01	192	498	0
	DW033	DW033-protein463	463	*			47840	48050	0
	DW375	DW375-protein1030	1030	*			21	441	0
	DW013	DW013-protein229	229	Uncharacterized protein MG096	MG096	1.02	1721	1991	1
	DW013	DW013-protein601	601	Phosphate transport system permease protein PstA homolog	pstA	1	1522	2173	1
	DW013	DW013-protein379	379	Uncharacterized protein MG294	MG294	1.01	2301	2610	0
	DW398	DW398-protein999	999	*			36	564	1
	DW285	DW285-protein816	816	Small ribosomal subunit protein bS20	rpsT	0.94	7853	8132	0
	DW493	DW493-protein20	20	*			2677	3382	1
	DW419	DW419-protein147	147	*			3	384	0
	DW043	DW043-protein56	56	*			2652	3039	0
	DW405	DW405-protein842	842	*			499	895	1
	DW373	DW373-protein1009	1009	*			211	562	0
	DW387	DW387-protein1089	1089	*			84	291	1
	DW027	DW027-protein717	717	Enolase	eno	1.01	7360	7819	0
	DW013	DW013-protein338	338	ATP synthase epsilon chain	atpC	1	4061	4463	1
	DW123	DW123-protein123	123	Uncharacterized protein MG256	MG256	1	76366	76888	1
	DW081	DW081-protein286	286	*			167355	167595	1
	DW013	DW013-protein24	24	Oligopeptide transport ATP-binding protein OppD	oppD	1	13708	14821	0
	DW166	DW166-protein473	473	Uncharacterized ATP-dependent helicase MG140	MG140	1	8347	9043	1
	DW309	DW309-protein968	968	*			25	652	1
	DW050	DW050-protein1023	1023	*			212	437	0
	DW013	DW013-protein416	416	*			2360	2795	0
	DW419	DW419-protein8	8	*			120	492	1
	DW033	DW033-protein577	577	Nicotinamide phosphoribosyltransferase	MG037	0.99	43047	43713	1
	DW033	DW033-protein135	135	*			80559	80778	1
	DW013	DW013-protein248	248	Small ribosomal subunit protein uS17	rpsQ	1.01	1093	1318	1
	DW384	DW384-protein1039	1039	*			224	452	0
	DW271	DW271-protein737	737	*			11	245	0
	DW429	DW429-protein1050	1050	*			169	397	0
	DW148	DW148-protein994	994	*			908	1274	1
	DW013	DW013-protein624	624	Large ribosomal subunit protein uL2	rplB	1	1368	2226	0
	DW430	DW430-protein1005	1005	*			48	462	1
	DW013	DW013-protein858	858	Threonine--tRNA ligase	thrS	1.02	406	883	1
	DW013	DW013-protein505	505	Uncharacterized protein MG181	MG181	1	22	484	1
	DW050	DW050-protein150	150	Protein translocase subunit SecA	secA	0.98	11055	11307	1
	DW013	DW013-protein764	764	Uncharacterized lipoprotein MG338	MG338	1	543	801	0
	DW439	DW439-protein955	955	*			274	766	0
	DW141	DW141-protein926	926	*			41	314	1
	DW027	DW027-protein776	776	Serine hydroxymethyltransferase	glyA	1	3386	4256	1
	DW027	DW027-protein1003	1003	*			39	411	1
	DW013	DW013-protein593	593	Large ribosomal subunit protein uL4	rplD	0.98	322	958	0
	DW013	DW013-protein323	323	Uncharacterized lipoprotein MG260	MG260	1.02	232	868	0
	DW013	DW013-protein156	156	Uncharacterized protein MG277	MG277	1	5039	5495	0
	DW428	DW428-protein996	996	*			456	963	0
	DW013	DW013-protein832	832	*			583	967	0
	DW013	DW013-protein347	347	Putative esterase/lipase 2	MG327	1	737	1544	1
	DW271	DW271-protein637	637	*			378	732	0
	DW383	DW383-protein983	983	*			143	500	0
	DW013	DW013-protein168	168	Glycine--tRNA ligase	glyQS	1	5735	6044	1
	DW483	DW483-protein850	850	*			7	682	1
	DW398	DW398-protein289	289	*			16184	16412	1
	DW148	DW148-protein1042	1042	*			59	563	1
	DW347	DW347-protein991	991	*			78	591	0
	DW013	DW013-protein276	276	Ribonuclease M5	rnmV	1	4292	4676	1
	DW386	DW386-protein299	299	*			64	427	0
	DW390	DW390-protein961	961	*			2	536	1
	DW272	DW272-protein533	533	*			112	511	1
	DW013	DW013-protein924	924	Uncharacterized protein MG364	MG364	1	61	418	1
	DW013	DW013-protein722	722	Large ribosomal subunit protein bL19	rplS	1	1411	1771	0
	DW387	DW387-protein1090	1090	*			35	263	0
	DW013	DW013-protein906	906	*			254	572	0
	DW425	DW425-protein952	952	*			627	1077	1
	DW013	DW013-protein630	630	Probable ATP-dependent RNA helicase MG425	MG425	1.02	1717	2056	0
	DW391	DW391-protein1057	1057	*			39	423	1
	DW027	DW027-protein722	722	Phosphate import ATP-binding protein PstB	pstB	0.99	10629	10863	0
	DW055	DW055-protein822	822	*			1141	1441	1
	DW013	DW013-protein443	443	Uncharacterized protein MG135	MG135	0.98	1162	1792	0
	DW013	DW013-protein412	412	Uncharacterized lipoprotein MG186	MG186	1.01	2818	3091	0
	DW033	DW033-protein702	702	ABC transport system permease protein p69	p69	1	32010	32268	0
	DW283	DW283-protein118	118	*			122	386	0
	DW374	DW374-protein19	19	*			19244	19562	1
	DW433	DW433-protein1001	1001	*			188	464	1
	DW386	DW386-protein262	262	Uncharacterized ABC transporter permease MG064	MG064	0.96	332	542	0
	DW096	DW096-protein961	961	*			9	585	0
	DW013	DW013-protein936	936	*			67	340	1
	DW013	DW013-protein642	642	*			1757	1979	1
	DW368	DW368-protein983	983	*			167	590	1
	DW013	DW013-protein782	782	Uncharacterized protein MG285	MG285	1.03	829	1039	1
	DW013	DW013-protein345	345	Transcriptional regulator MraZ	mraZ	0.91	4041	4506	0
	DW435	DW435-protein972	972	*			359	797	1
	DW047	DW047-protein225	225	*			565	823	0
	DW097	DW097-protein128	128	*			29854	30268	0
	DW013	DW013-protein35	35	Methionine--tRNA ligase	metG	1	2589	2985	1
	DW013	DW013-protein400	400	Uncharacterized protein MG350.1	MG350.1	1.01	452	662	1
	DW079	DW079-protein963	963	*			670	1360	1
	DW027	DW027-protein27	27	Uncharacterized protein MG123	MG123	1	16576	17569	0
	DW013	DW013-protein720	720	Uncharacterized protein MG443	MG443	1	208	601	0
	DW013	DW013-protein587	587	Phosphate import ATP-binding protein PstB	pstB	0.99	1485	1830	1
	DW483	DW483-protein917	917	*			113	533	1
	M6320	M6320-protein232	232	Uncharacterized protein MG098	MG098	1	132911	133871	0
	DW430	DW430-protein995	995	*			153	546	0
	DW013	DW013-protein90	90	Uncharacterized protein MG237	MG237	1	348	1233	1
	DW425	DW425-protein991	991	*			13	574	1
	DW462	DW462-protein946	946	*			996	1938	1
	DW097	DW097-protein650	650	Uncharacterized RNA pseudouridine synthase MG370	MG370	0.97	2945	3560	1
	DW440	DW440-protein527	527	*			0	1605	1
	DW013	DW013-protein302	302	Uncharacterized ABC transporter permease MG468	MG468	1.01	1680	2454	1
	DW013	DW013-protein356	356	Putative ABC transporter ATP-binding protein MG065	MG065	1.02	1436	1637	1
	DW112	DW112-protein1002	1002	*			158	413	0
	DW013	DW013-protein172	172	*			559	820	1
	DW391	DW391-protein1024	1024	*			160	553	0
	DW077	DW077-protein798	798	*			1331	1643	0
	DW381	DW381-protein993	993	*			13	370	1
	DW013	DW013-protein329	329	Large ribosomal subunit protein bL31	rpmE	0.99	3447	3741	0
	DW402	DW402-protein1086	1086	*			118	334	1
	DW339	DW339-protein968	968	*			121	493	1
	DW284	DW284-protein841	841	*			10	391	0
	DW079	DW079-protein1006	1006	*			1	250	1
	DW397	DW397-protein867	867	*			304	1579	0
	DW166	DW166-protein810	810	Mgp-operon protein 3	MG192	0.82	27302	27587	0
	DW096	DW096-protein1002	1002	*			4	367	0
	DW299	DW299-protein1005	1005	*			41	1007	0
	DW065	DW065-protein1014	1014	*			43	403	1
	DW013	DW013-protein382	382	tRNA-specific 2-thiouridylase MnmA	mnmA	1	3558	3831	0
	M6328	M6328-protein990	990	Protein ea22			113	662	0
	DW047	DW047-protein271	271	*			16	445	1
	DW088	DW088-protein460	460	Spermidine/putrescine transport system permease protein PotC homolog	potC	0.99	51693	52536	1
	DW305	DW305-protein406	406	*			57	528	1
	DW013	DW013-protein157	157	Uncharacterized protein MG277	MG277	1	5495	5804	0
	DW349	DW349-protein678	678	*			1088	1520	1
	DW282	DW282-protein381	381	Uncharacterized lipoprotein MG186	MG186	0.99	8065	8416	0
	DW027	DW027-protein236	236	Segregation and condensation protein A	scpA	1	58810	59695	0
	DW435	DW435-protein1006	1006	*			238	727	1
	DW013	DW013-protein660	660	*			1532	1823	1
	DW386	DW386-protein204	204	*			39	357	1
	DW273	DW273-protein462	462	Fructose-bisphosphate aldolase	fba	0.99	9	561	1
	DW041	DW041-protein549	549	DNA polymerase III PolC-type	polC	1.02	19712	20003	0
	DW027	DW027-protein767	767	Chaperone protein ClpB	clpB	1.01	9825	10464	1
	DW166	DW166-protein1017	1017	*			133	373	0
	DW085	DW085-protein974	974	*			1102	1900	1
	DW013	DW013-protein354	354	Uncharacterized protein MG323.1	MG323.1	1.01	3675	3945	1
	DW128	DW128-protein946	946	Alanine--tRNA ligase	alaS	0.98	23251	23761	0
	DW013	DW013-protein396	396	*			2396	2702	1
	DW128	DW128-protein327	327	Large ribosomal subunit protein uL23	rplW	0.96	185193	185526	1
	DW027	DW027-protein998	998	*			91	454	1
	DW013	DW013-protein299	299	Uncharacterized ABC transporter permease MG468	MG468	1.01	654	858	1
	DW397	DW397-protein791	791	*			1678	2761	1
	DW398	DW398-protein990	990	*			330	849	0
	DW027	DW027-protein763	763	Acetate kinase	ackA	1.01	7635	8133	1
	DW098	DW098-protein362	362	Uncharacterized protein MG385	MG385	0.99	44440	44926	1
	DW085	DW085-protein990	990	*			167	659	0
	DW013	DW013-protein902	902	*			222	627	0
	DW013	DW013-protein320	320	Putative ABC transporter ATP-binding protein MG014	MG014	1.01	2679	3105	1
	DW373	DW373-protein942	942	*			1381	1678	0
	DW397	DW397-protein931	931	*			167	839	0
	DW392	DW392-protein1021	1021	*			2	410	0
	DW013	DW013-protein771	771	Isoleucine--tRNA ligase	ileS	1.02	539	785	0
	DW013	DW013-protein240	240	Dihydrolipoyl dehydrogenase	pdhD	1.04	2855	3092	0
	DW443	DW443-protein659	659	Uncharacterized lipoprotein MG439	MG439	0.99	1188	1422	1
	DW013	DW013-protein81	81	Cytidine deaminase	cdd	1	9451	9844	1
	DW013	DW013-protein391	391	Uncharacterized protein MG202	MG202	1	3532	3901	0
	DW013	DW013-protein602	602	Uncharacterized protein MG369	MG369	1	562	1717	0
	DW027	DW027-protein873	873	Agnoprotein			1762	1978	0
	DW372	DW372-protein2	2	*			378	960	1
	DW384	DW384-protein974	974	*			20	419	0
	DW013	DW013-protein163	163	Cysteine--tRNA ligase	cysS	1	3551	3812	1
	DW039	DW039-protein990	990	Uncharacterized protein MG415	MG415	1	1063	1558	1
	DW085	DW085-protein987	987	*			1475	1922	0
	DW444	DW444-protein983	983	*			30	519	0
	DW085	DW085-protein961	961	*			161	557	1
	DW435	DW435-protein985	985	*			230	608	0
	DW409	DW409-protein1025	1025	*			7	253	1
	DW013	DW013-protein128	128	DNA gyrase subunit A	gyrA	1	3810	6321	1
	DW153	DW153-protein1018	1018	*			93	573	1
	DW395	DW395-protein926	926	*			8	326	1
	DW013	DW013-protein209	209	Heat-inducible transcription repressor HrcA	hrcA	1.01	838	1069	0
	DW375	DW375-protein1032	1032	*			29	404	0
	DW347	DW347-protein961	961	*			88	646	1
	DW456	DW456-protein983	983	*			653	1070	0
	DW013	DW013-protein333	333	ATP synthase subunit alpha	atpA	1	229	976	1
	DW027	DW027-protein881	881	Arginine--tRNA ligase	argS	1.01	2904	3357	1
	DW013	DW013-protein463	463	Pyruvate kinase	pyk	1.01	1808	2102	1
	DW360	DW360-protein809	809	*			193	664	0
	DW043	DW043-protein55	55	*			213	576	1
	DW374	DW374-protein9	9	*			6474	6870	1
	DW013	DW013-protein377	377	Uncharacterized protein MG294	MG294	1	1398	1830	0
	DW427	DW427-protein993	993	*			834	1392	0
	DW027	DW027-protein959	959	Protein RecA	recA	1	1694	2717	0
	M6320	M6320-protein177	177	Ribonuclease Y	rny	0.97	100405	101722	0
	DW027	DW027-protein699	699	Putative ABC transporter ATP-binding protein MG014	MG014	0.98	12250	13006	0
	DW013	DW013-protein236	236	Uncharacterized protein MG269.1	MG269.1	1	309	696	0
	DW013	DW013-protein205	205	Transcription termination/antitermination protein NusA	nusA	0.99	5689	6088	1
	DW271	DW271-protein601	601	*			696	966	0
	DW353	DW353-protein424	424	*			154	1483	1
	DW371	DW371-protein978	978	*			34	670	1
	DW027	DW027-protein513	513	UTP--glucose-1-phosphate uridylyltransferase	galU	1	4824	5703	1
	DW013	DW013-protein324	324	Uncharacterized protein MG259	MG259	1	1327	1759	0
	DW456	DW456-protein997	997	*			119	488	1
	DW443	DW443-protein986	986	*			370	880	0
	DW419	DW419-protein63	63	*			184	634	0
	DW013	DW013-protein218	218	Uncharacterized protein MG432	MG432	1.01	233	566	1
	DW013	DW013-protein828	828	Uncharacterized protein			374	1001	1
	DW027	DW027-protein289	289	PTS system fructose-specific EIIABC component	fruA	1.02	23475	23742	0
	DW438	DW438-protein979	979	*			43	571	0
	DW013	DW013-protein578	578	Mgp-operon protein 3	MG192	0.96	695	2003	0
	DW428	DW428-protein1021	1021	*			43	403	0
	DW108	DW108-protein915	915	Uncharacterized protein MG384.1	MG384.1	1.02	1742	1946	0
	DW482	DW482-protein957	957	*			350	704	0
	DW013	DW013-protein86	86	Transcription termination/antitermination protein NusG	nusG	1.01	12099	12423	0
	DW013	DW013-protein138	138	Uncharacterized lipoprotein MG185	MG185	1	1487	2114	1
	DW373	DW373-protein987	987	*			46	625	1
	DW332	DW332-protein969	969	*			28	427	0
	DW481	DW481-protein788	788	*			261	525	0
	DW481	DW481-protein971	971	*			63	423	0
	DW013	DW013-protein234	234	Glutamyl-tRNA(Gln) amidotransferase subunit A	gatA	0.99	4318	5128	1
	DW398	DW398-protein1038	1038	*			1	394	1
	DW273	DW273-protein72	72	*			12	297	1
	DW013	DW013-protein937	937	*			133	538	0
	DW355	DW355-protein972	972	*			71	338	1
	DW013	DW013-protein501	501	UDP-glucose 4-epimerase	galE	0.99	1915	2152	1
	DW013	DW013-protein275	275	Ribose-phosphate pyrophosphokinase	prs	0.91	3222	4314	1
	DW402	DW402-protein837	837	*			698	1070	0
	DW388	DW388-protein1036	1036	*			33	390	0
	DW123	DW123-protein766	766	Uncharacterized ATP-dependent helicase MG018	MG018	1.01	8784	9774	1
	DW013	DW013-protein85	85	Transcription termination/antitermination protein NusG	nusG	1	11472	11994	0
	DW097	DW097-protein647	647	Uncharacterized protein MG371	MG371	1	2005	2512	1
	DW013	DW013-protein892	892	Chaperone protein ClpB	clpB	1.02	455	728	1
	DW341	DW341-protein767	767	*			117	372	1
	DW013	DW013-protein701	701	Probable transcriptional regulatory protein MG332	MG332	1	677	1397	1
	DW027	DW027-protein847	847	Uncharacterized protein MG343	MG343	1.02	3478	3718	1
	DW129	DW129-protein1007	1007	*			1382	1802	1
	DW013	DW013-protein555	555	Aspartate--tRNA ligase	aspS	1	968	1505	0
	DW027	DW027-protein757	757	Uncharacterized protein MG360	MG360	1.01	4087	4651	1
	DW402	DW402-protein1007	1007	*			176	617	0
	DW285	DW285-protein968	968	*			563	881	0
	DW013	DW013-protein437	437	Putative phosphatase/phosphodiesterase MG246	MG246	1	2543	3188	0
	DW013	DW013-protein285	285	Adhesin P1	mgpA	1.02	3572	3845	1
	DW013	DW013-protein93	93	Lon protease	lon	1.01	3787	5053	1
	DW013	DW013-protein808	808	Nicotinamide phosphoribosyltransferase	MG037	1.01	310	661	0
	DW027	DW027-protein920	920	Inorganic pyrophosphatase	ppa	0.99	1016	1235	0
	DW289	DW289-protein345	345	PTS system fructose-specific EIIABC component	fruA	0.99	585	2337	1
	DW013	DW013-protein290	290	Leucine--tRNA ligase	leuS	1.03	1156	1360	0
	DW013	DW013-protein175	175	Glycerol 3-phosphate oxidase	MG039	1.01	1250	1625	0
	DW033	DW033-protein130	130	UDP-galactopyranose mutase	glf	0.99	75404	76244	1
	DW355	DW355-protein912	912	*			889	1375	1
	DW418	DW418-protein969	969	*			758	1313	1
	DW415	DW415-protein1003	1003	*			905	1148	0
	DW013	DW013-protein514	514	PTS system glucose-specific EIICBA component	ptsG	1.02	2311	2620	0
	DW318	DW318-protein133	133	*			1619	1973	1
	DW027	DW027-protein203	203	Ribonucleoside-diphosphate reductase subunit alpha	nrdE	1	34653	36282	0
	DW013	DW013-protein639	639	Uncharacterized lipoprotein MG348	MG348	0.99	1320	1842	0
	DW374	DW374-protein147	147	*			6513	7026	1
	DW386	DW386-protein263	263	Inner membrane protein			87	441	0
	DW359	DW359-protein565	565	*			4812	5046	1
	DW027	DW027-protein399	399	Transcription termination/antitermination protein NusA	nusA	1	34989	35673	0
	DW041	DW041-protein315	315	Adenine phosphoribosyltransferase	apt	0.94	14903	15485	1
	DW013	DW013-protein538	538	Uncharacterized protein MG456	MG456	1.02	202	481	1
	DW387	DW387-protein977	977	*			1493	2048	1
	DW013	DW013-protein46	46	Elongation factor P	efp	1	6770	7343	1
	DW013	DW013-protein696	696	NH(3)-dependent NAD(+) synthetase	nadE	1	1066	1510	0
	DW013	DW013-protein263	263	Phosphoglycerate kinase	pgk	1	1052	2045	1
	DW285	DW285-protein955	955	*			105	312	0
	DW079	DW079-protein1005	1005	*			73	523	1
	DW119	DW119-protein574	574	Uncharacterized protein MG149.1	MG478	0.98	14450	14714	1
	DW271	DW271-protein447	447	*			1268	1487	0
	DW405	DW405-protein882	882	*			22	376	1
	DW381	DW381-protein941	941	*			1977	2637	0
	DW282	DW282-protein930	930	*			21	378	1
	DW374	DW374-protein144	144	*			5269	5698	1
	DW013	DW013-protein605	605	DegV domain-containing protein MG450	MG450	1.01	1201	1510	1
	DW486	DW486-protein984	984	*			592	991	0
	DW292	DW292-protein889	889	*			447	840	0
	M6282	M6282-protein607	607	*			352285	352609	1
	DW292	DW292-protein991	991	*			21	426	1
	DW097	DW097-protein313	313	*			17697	17925	0
	DW141	DW141-protein269	269	*			76	337	1
	DW425	DW425-protein882	882	*			36	546	1
	DW292	DW292-protein1010	1010	*			52	439	0
	DW027	DW027-protein4	4	Ribonuclease J	rnj	1	1744	3403	0
	DW373	DW373-protein1032	1032	*			5	431	0
	DW013	DW013-protein631	631	*			212	440	1
	DW027	DW027-protein633	633	Phenylalanine--tRNA ligase beta subunit	pheT	1.02	10423	10825	0
	DW013	DW013-protein962	962	*			51	258	0
	DW155	DW155-protein1049	1049	*			168	372	1
	DW374	DW374-protein10	10	hypothetical protein			6871	7297	1
	DW013	DW013-protein375	375	Uncharacterized protein MG293	MG293	1.01	617	1193	0
	DW013	DW013-protein864	864	Uncharacterized protein MG148	MG148	0.99	114	369	0
	DW141	DW141-protein882	882	*			382	622	0
	DW013	DW013-protein322	322	Putative ABC transporter ATP-binding protein MG015	MG015	1	3478	4093	1
	DW013	DW013-protein267	267	*			3784	4123	0
	DW381	DW381-protein985	985	*			709	1063	0
	DW374	DW374-protein436	436	*			899	1658	0
	DW027	DW027-protein834	834	Threonine--tRNA ligase	thrS	1.02	5298	5616	0
	DW433	DW433-protein992	992	*			774	1467	0
	DW079	DW079-protein776	776	*			9216	9471	0
	DW013	DW013-protein705	705	Uncharacterized protein MG314	MG314	1.02	712	1147	1
	DW349	DW349-protein795	795	*			822	1263	0
	DW043	DW043-protein143	143	*			1001	1601	1
	DW318	DW318-protein736	736	*			15977	16238	0
	DW013	DW013-protein406	406	Probable ABC transporter permease protein MG188	MG188	0.98	31	595	0
	DW268	DW268-protein719	719	*			57	336	1
	DW013	DW013-protein569	569	*			123	747	1
	DW013	DW013-protein22	22	Oligopeptide transport ATP-binding protein OppF	oppF	1	11093	12200	0
	DW271	DW271-protein728	728	*			176	389	1
	DW013	DW013-protein730	730	Uncharacterized protein MG373	MG373	1.01	637	997	0
	DW027	DW027-protein1030	1030	*			2	398	0
	DW058	DW058-protein995	995	*			244	649	1
	DW401	DW401-protein523	523	*			2043	2820	0
	DW065	DW065-protein294	294	*			166806	167265	0
	DW487	DW487-protein805	805	*			95	326	1
	DW487	DW487-protein866	866	*			57	450	0
	DW013	DW013-protein632	632	Holliday junction branch migration complex subunit RuvA	ruvA	1	757	1258	1
	DW013	DW013-protein281	281	Bifunctional oligoribonuclease and PAP phosphatase NrnA	nrnA	0.99	1073	1841	1
	DW098	DW098-protein322	322	*			19536	20004	0
	DW454	DW454-protein984	984	*			163	559	0
	DW349	DW349-protein503	503	*			695	1607	1
	DW148	DW148-protein1023	1023	*			435	1014	0
	DW419	DW419-protein97	97	*			39	276	1
	DW050	DW050-protein972	972	*			22	388	1
	M6280	M6280-protein222	222	*			131590	131893	1
	DW444	DW444-protein1001	1001	*			217	670	0
	DW013	DW013-protein851	851	*			711	975	1
	DW013	DW013-protein29	29	Oligopeptide transport system permease protein OppB	oppB	1	16149	16893	0
	DW013	DW013-protein637	637	tRNA (guanine-N(7)-)-methyltransferase	trmB	1.01	537	879	1
	DW318	DW318-protein735	735	Adhesin P1	mgpA	0.62	15709	16054	1
	DW430	DW430-protein981	981	*			363	894	1
	DW392	DW392-protein858	858	*			1356	2709	0
	DW155	DW155-protein1024	1024	*			337	802	1
	DW286	DW286-protein801	801	*			693	1065	0
	DW444	DW444-protein1007	1007	*			387	642	1
	DW428	DW428-protein1007	1007	*			32	449	0
	DW299	DW299-protein990	990	*			305	788	0
	DW483	DW483-protein883	883	*			324	540	0
	DW013	DW013-protein3	3	Large ribosomal subunit protein bL9	rplI	1	1475	1928	0
	DW027	DW027-protein859	859	Probable cysteine desulfurase	csd	1	2722	3178	0
	DW166	DW166-protein974	974	*			305	725	0
	DW374	DW374-protein12	12	hypothetical protein			7990	8344	1
	DW382	DW382-protein1025	1025	*			10	388	0
	DW278	DW278-protein849	849	*			24	267	1
	DW425	DW425-protein767	767	*			6019	6517	0
	DW436	DW436-protein1080	1080	*			41	452	0
	DW386	DW386-protein271	271	*			310	640	0
	DW013	DW013-protein633	633	Holliday junction branch migration complex subunit RuvB	ruvB	1	1232	2156	1
	DW013	DW013-protein541	541	Tyrosine--tRNA ligase	tyrS	1.02	1682	1907	0
	DW027	DW027-protein825	825	Probable tRNA sulfurtransferase	thiI	1	1114	2272	0
	DW013	DW013-protein561	561	Putative protein phosphatase	MG108	1	1004	1319	1
	DW013	DW013-protein615	615	Phenylalanine--tRNA ligase beta subunit	pheT	1.01	805	1279	0
	DW155	DW155-protein1012	1012	*			254	674	0
	DW374	DW374-protein13	13	*			8376	8583	1
	DW013	DW013-protein690	690	Small ribosomal subunit protein uS15	rpsO	1	1548	1809	0
	DW486	DW486-protein959	959	*			459	987	0
	DW013	DW013-protein2	2	Replicative DNA helicase	dnaB	1.01	862	1492	0
	DW013	DW013-protein517	517	Methionine aminopeptidase	map	0.99	638	1385	0
	DW425	DW425-protein1026	1026	*			29	314	0
	DW047	DW047-protein23	23	*			196	457	1
	DW451	DW451-protein1	1	*			58	391	1
	DW374	DW374-protein799	799	*			64	448	1
	DW339	DW339-protein947	947	*			1016	1268	0
	DW013	DW013-protein97	97	Uncharacterized protein MG241	MG241	1.01	6154	6613	1
	DW013	DW013-protein926	926	*			81	597	1
	DW013	DW013-protein627	627	Hydroperoxide reductase	MG427	1.01	163	454	0
	DW483	DW483-protein914	914	*			51	561	1
	DW027	DW027-protein614	614	Uncharacterized protein MG423	MG423	0.99	15590	17036	1
	DW013	DW013-protein787	787	*			454	868	0
	DW383	DW383-protein1018	1018	*			13	391	0
	DW047	DW047-protein44	44	*			925	1321	1
	M6713	M6713-protein904	904	Chromosome partition protein Smc	smc	1	101933	103283	0
	DW450	DW450-protein591	591	*			41716	42325	0
	DW292	DW292-protein850	850	*			1547	1907	0
	DW269	DW269-protein221	221	Cytadherence high molecular weight protein 1	hmw1	0.98	16940	19085	1
	DW269	DW269-protein937	937	*			6	252	1
	DW013	DW013-protein70	70	S-adenosylmethionine synthase	metK	1.02	4026	4257	1
	DW141	DW141-protein648	648	Large ribosomal subunit protein uL10	rplJ	0.96	11	512	1
	DW402	DW402-protein911	911	*			2488	2800	1
	DW482	DW482-protein985	985	*			216	528	1
	DW027	DW027-protein831	831	Threonine--tRNA ligase	thrS	1	3921	4506	0
	DW440	DW440-protein600	600	Uridine kinase	udk	0.95	88	295	1
	DW359	DW359-protein560	560	*			2753	3149	1
	DW414	DW414-protein605	605	*			3020	3245	0
	DW392	DW392-protein861	861	*			5155	5584	1
	DW292	DW292-protein1032	1032	*			63	462	0
	DW013	DW013-protein894	894	*			22	439	0
	DW027	DW027-protein843	843	Isoleucine--tRNA ligase	ileS	1	2271	2487	1
	DW271	DW271-protein33	33	*			4581	4812	1
	DW013	DW013-protein815	815	Signal recognition particle receptor FtsY	ftsY	1	213	771	1
	DW013	DW013-protein717	717	Uncharacterized lipoprotein MG307	MG307	1.02	70	490	1
	DW299	DW299-protein1020	1020	*			417	636	0
	DW013	DW013-protein479	479	Asparagine--tRNA ligase	asnS	1	2188	3124	1
	DW027	DW027-protein863	863	UPF0154 protein MG335.1	MG335.1	1	5141	5363	1
	DW166	DW166-protein547	547	Adhesin P1	mgpA	0.84	45098	45455	1
	DW398	DW398-protein1036	1036	*			33	405	0
	DW041	DW041-protein1011	1011	*			33	492	1
	DW129	DW129-protein1040	1040	*			212	662	1
	DW304	DW304-protein625	625	Uncharacterized lipoprotein MG307	MG307	0.97	409	1483	1
	DW322	DW322-protein803	803	*			125	332	1
	DW013	DW013-protein15	15	tRNA(Ile)-lysidine synthase	tilS	0.99	8483	8828	0
	DW013	DW013-protein431	431	Probable ATP-dependent RNA helicase MG308	MG308	1	3179	3596	1
	DW013	DW013-protein360	360	DnaJ-like protein MG200	MG200	1	580	1546	0
	DW027	DW027-protein917	917	*			2952	3168	0
	DW027	DW027-protein395	395	Translation initiation factor IF-2	infB	1	31959	33819	0
	DW430	DW430-protein1011	1011	*			3	357	0
	DW388	DW388-protein1023	1023	*			153	417	1
	DW013	DW013-protein251	251	Large ribosomal subunit protein uL5	rplE	0.99	2054	2345	1
	DW027	DW027-protein903	903	Uncharacterized lipoprotein MG348	MG348	1.01	2006	2252	0
	DW382	DW382-protein994	994	*			33	615	0
	DW433	DW433-protein1050	1050	*			267	633	0
	DW013	DW013-protein233	233	Uncharacterized protein MG098	MG098	1	3857	4316	1
	DW013	DW013-protein192	192	Co-chaperonin GroES	groES	1	5329	5662	0
	DW013	DW013-protein481	481	Uncharacterized protein MG123	MG123	1.02	156	459	1
	DW375	DW375-protein996	996	*			4	373	1
	DW334	DW334-protein1007	1007	Uncharacterized protein			9	786	0
	DW027	DW027-protein1009	1009	*			104	488	0
	DW396	DW396-protein805	805	*			1608	2079	1
	DW013	DW013-protein241	241	Dihydrolipoyllysine-residue acetyltransferase component of pyruvate dehydrogenase complex	pdhC	1	3095	4250	0
	DW013	DW013-protein885	885	Uncharacterized protein MG210.1	MG210.1	1.01	233	479	1
	DW458	DW458-protein998	998	*			98	524	1
	DW155	DW155-protein1004	1004	*			1228	1792	0
	DW077	DW077-protein1038	1038	*			185	422	0
	DW027	DW027-protein846	846	Putative esterase/lipase 3	MG344	1.01	3190	3475	1
	DW273	DW273-protein377	377	*			12	276	1
	DW392	DW392-protein904	904	*			7	1759	1
	DW155	DW155-protein300	300	*			38485	39640	0
	DW268	DW268-protein927	927	*			33	435	1
	DW375	DW375-protein908	908	*			41	431	1
	DW369	DW369-protein1034	1034	*			88	415	1
	DW301	DW301-protein898	898	*			186	876	1
	DW428	DW428-protein1025	1025	*			42	405	1
	DW013	DW013-protein751	751	Valine--tRNA ligase	valS	1.02	697	931	0
	DW013	DW013-protein835	835	Uncharacterized protein MG255.1	MG_494	0.98	144	504	0
	DW129	DW129-protein1005	1005	*			367	787	1
	DW374	DW374-protein812	812	*			449	677	1
	DW013	DW013-protein518	518	Adenylate kinase	adk	0.97	1387	2032	0
	M2282	M2282-protein924	924	*			534186	536391	0
	DW013	DW013-protein596	596	Small ribosomal subunit protein uS10	rpsJ	1	1734	2055	0
	DW309	DW309-protein978	978	*			109	592	0
	DW405	DW405-protein934	934	*			11	257	1
	DW355	DW355-protein850	850	*			686	2015	1
	DW039	DW039-protein71	71	Histidine--tRNA ligase	hisS	1.01	39890	40418	1
	DW166	DW166-protein488	488	UPF0053 protein MG146	MG146	0.99	15891	16281	1
	DW398	DW398-protein938	938	*			2432	3185	0
	DW013	DW013-protein523	523	Uncharacterized ABC transporter permease MG064	MG064	0.99	1679	2570	0
	DW033	DW033-protein965	965	Uncharacterized protein MG415	MG415	1	447	948	0
	DW389	DW389-protein607	607	*			7867	8260	1
	M6283	M6283-protein19	19	Isoleucine--tRNA ligase	ileS	1.01	13469	13883	0
	DW440	DW440-protein729	729	*			80	479	0
	DW027	DW027-protein413	413	Proline--tRNA ligase	proS	0.99	2340	3162	0
	DW013	DW013-protein334	334	ATP synthase subunit alpha	atpA	1	997	1786	1
	DW368	DW368-protein785	785	*			6581	7265	0
	DW013	DW013-protein570	570	Ribonucleoside-diphosphate reductase subunit alpha	nrdE	1.01	197	656	1
	DW027	DW027-protein5	5	Elongation factor 4	lepA	1	3486	5283	0
	DW148	DW148-protein1034	1034	*			68	791	0
	DW464	DW464-protein1016	1016	*			0	357	1
	DW371	DW371-protein997	997	*			75	525	1
	DW013	DW013-protein220	220	Uncharacterized protein MG432	MG432	0.99	1025	1238	1
	DW027	DW027-protein164	164	DNA primase	dnaG	1.01	13865	14495	1
	DW027	DW027-protein888	888	*			2499	2868	1
	DW387	DW387-protein976	976	*			2489	2792	0
	DW380	DW380-protein988	988	*			140	626	1
	DW013	DW013-protein134	134	Uncharacterized protein MG007	MG007	0.99	8466	8754	1
	DW013	DW013-protein433	433	RNA polymerase sigma factor SigA	sigA	1.01	698	1214	1
	DW013	DW013-protein863	863	Endoribonuclease YbeY	ybeY	1.01	130	454	1
	DW423	DW423-protein983	983	*			259	646	0
	DW013	DW013-protein155	155	Uncharacterized protein MG277	MG277	1	4061	4496	0
	DW396	DW396-protein996	996	*			20	347	0
	DW383	DW383-protein1003	1003	*			101	461	1
	DW013	DW013-protein465	465	Uncharacterized protein MG306	MG306	1.02	1022	1286	1
	DW493	DW493-protein23	23	*			1248	1464	0
	DW027	DW027-protein570	570	Uncharacterized cation transporter MG322	MG322	1	13188	14499	0
	DW129	DW129-protein1013	1013	*			274	829	0
	DW155	DW155-protein1051	1051	*			44	452	0
	DW148	DW148-protein976	976	*			1316	1769	1
	DW427	DW427-protein1010	1010	*			2	413	0
	DW368	DW368-protein1068	1068	*			55	268	1
	DW334	DW334-protein1013	1013	*			581	1025	1
	DW360	DW360-protein810	810	*			734	1646	0
	DW405	DW405-protein726	726	*			763	1246	0
	DW334	DW334-protein1022	1022	*			216	600	0
	DW390	DW390-protein1075	1075	*			19	247	0
	DW013	DW013-protein74	74	Signal recognition particle protein	ffh	1	5632	6355	0
	DW405	DW405-protein566	566	*			4	604	0
	DW129	DW129-protein1001	1001	*			83	593	1
	DW129	DW129-protein1012	1012	*			1313	1745	1
	DW013	DW013-protein516	516	Translation initiation factor IF-1	infA	1	426	639	0
	M2300	M2300-protein210	210	ATP-dependent zinc metalloprotease FtsH	ftsH	1	116831	118295	1
	DW141	DW141-protein893	893	*			4	406	1
	DW129	DW129-protein1031	1031	*			556	841	0
	DW481	DW481-protein421	421	*			34910	35375	1
	DW377	DW377-protein978	978	*			848	1469	1
	DW155	DW155-protein1010	1010	*			1210	1594	0
	DW013	DW013-protein753	753	*			159	630	0
	DW405	DW405-protein904	904	*			14	422	0
	DW354	DW354-protein806	806	*			2220	2787	0
	DW341	DW341-protein803	803	Uncharacterized protein MG349	MG349	0.98	400	757	1
	DW419	DW419-protein254	254	*			32	245	1
	DW033	DW033-protein783	783	DNA polymerase III subunit alpha	dnaE	1	1718	2081	1
	DW081	DW081-protein660	660	Mgp-operon protein 3	MG192	0.76	11810	12125	0
	DW013	DW013-protein585	585	*			914	1331	0
	DW374	DW374-protein274	274	*			3625	4372	1
	DW013	DW013-protein88	88	Uncharacterized protein MG055.2	MG055.2	1	13105	13348	0
	DW438	DW438-protein993	993	*			1038	1545	0
	DW493	DW493-protein216	216	*			15	408	1
	DW443	DW443-protein960	960	*			380	650	1
	DW041	DW041-protein357	357	Uncharacterized lipoprotein MG067	MG067	1.01	4151	4436	0
	DW013	DW013-protein393	393	Putative type I specificity subunit S.MgeORF438P	MG438	0.99	909	1425	0
	DW013	DW013-protein466	466	Chaperone protein DnaK	dnaK	1	1522	3250	1
	DW141	DW141-protein486	486	*			56	320	1
	DW375	DW375-protein1017	1017	*			129	474	1
	DW371	DW371-protein861	861	*			9810	10053	1
	DW359	DW359-protein564	564	*			4323	4791	1
	DW351	DW351-protein888	888	*			214	610	0
	DW368	DW368-protein1049	1049	*			36	393	0
	DW373	DW373-protein997	997	*			144	360	0
	DW395	DW395-protein944	944	*			179	548	0
	DW299	DW299-protein993	993	*			2910	3300	0
	DW402	DW402-protein1069	1069	*			14	434	1
	DW355	DW355-protein887	887	Uncharacterized protein MG281	MG281	0.92	1400	2108	0
	DW013	DW013-protein115	115	Probable cation-transporting P-type ATPase	pacL	1.01	8063	8336	0
	DW027	DW027-protein868	868	Phosphate acyltransferase	plsX	1	2561	3548	1
	DW013	DW013-protein551	551	*			1661	2219	1
	DW013	DW013-protein617	617	Phenylalanine--tRNA ligase alpha subunit	pheS	1.01	1474	2035	0
	DW398	DW398-protein995	995	*			152	521	0
	DW013	DW013-protein449	449	*			108	366	1
	DW429	DW429-protein1076	1076	*			1	202	0
	DW133	DW133-protein482	482	RNA polymerase sigma factor SigA	sigA	0.97	17357	17726	1
	DW027	DW027-protein471	471	Signal recognition particle receptor FtsY	ftsY	1.01	3908	4241	0
	DW392	DW392-protein1043	1043	*			20	437	1
	DW395	DW395-protein863	863	*			481	1102	0
	DW430	DW430-protein992	992	*			132	489	1
	DW013	DW013-protein499	499	Uncharacterized protein MG117	MG117	1.01	795	1149	1
	DW085	DW085-protein1013	1013	*			37	415	1
	DW268	DW268-protein951	951	*			260	626	1
	DW283	DW283-protein744	744	*			487	892	1
	DW013	DW013-protein472	472	Putative phosphotransferase enzyme IIB component MG129	MG129	0.99	2561	2897	0
	DW027	DW027-protein860	860	Probable cysteine desulfurase	csd	1.01	3565	3949	0
	DW351	DW351-protein531	531	*			1649	2567	1
	DW013	DW013-protein61	61	DNA polymerase III PolC-type	polC	1.02	13732	13933	0
	DW389	DW389-protein428	428	PTS system glucose-specific EIICBA component	ptsG	1	2861	3164	1
	DW374	DW374-protein3	3	*			1035	2748	1
	DW013	DW013-protein308	308	Uncharacterized protein MG218.1	MG218.1	1	3546	4242	1
	DW486	DW486-protein965	965	*			1067	1427	0
	DW088	DW088-protein362	362	*			89375	89699	1
	DW452	DW452-protein235	235	Mgp-operon protein 3	MG192	0.7	50758	51058	0
	DW129	DW129-protein1023	1023	*			417	783	1
	DW041	DW041-protein1014	1014	*			171	588	0
	M6711	M6711-protein331	331	hypothetical protein			194920	195211	0
	DW377	DW377-protein967	967	*			2439	3678	0
	DW013	DW013-protein445	445	Lysine--tRNA ligase	lysS	1	2335	2734	1
	DW377	DW377-protein999	999	*			65	620	0
	DW405	DW405-protein944	944	*			39	246	0
	DW013	DW013-protein667	667	*			787	1249	1
	DW013	DW013-protein728	728	ParA family protein MG470	MG470	1	811	1621	0
	DW013	DW013-protein238	238	Probable lipoate-protein ligase A	lplA	1	1120	1642	0
	M6270	M6270-protein413	413	*			235629	235902	1
	DW027	DW027-protein747	747	Beta sliding clamp	dnaN	1	11552	12695	0
	DW013	DW013-protein214	214	Uncharacterized protein MG208	MG208	0.99	4175	4766	0
	DW279	DW279-protein387	387	Glutamate--tRNA ligase	gltX	1	7730	8084	0
	DW153	DW153-protein992	992	Uncharacterized protein MG414	MG414	0.87	1091	1481	1
	DW027	DW027-protein852	852	Uncharacterized lipoprotein MG338	MG338	1.01	210	729	1
	DW013	DW013-protein526	526	*			514	895	1
	DW329	DW329-protein629	629	Uncharacterized protein MG374	MG374	0.99	7408	7768	0
	DW013	DW013-protein535	535	DNA-directed RNA polymerase subunit alpha	rpoA	0.99	1386	1968	0
	DW013	DW013-protein571	571	Large ribosomal subunit protein bL21	rplU	1	748	1051	1
	DW482	DW482-protein971	971	*			331	787	1
	DW013	DW013-protein539	539	Uncharacterized protein MG456	MG456	1	490	1207	1
	DW027	DW027-protein130	130	PTS system glucose-specific EIICBA component	ptsG	1.03	77920	78502	0
	DW410	DW410-protein976	976	*			24	252	1
	DW013	DW013-protein215	215	Uncharacterized RNA pseudouridine synthase MG209	MG209	1	4749	5676	0
	DW112	DW112-protein903	903	*			224	839	1
	DW013	DW013-protein4	4	Small ribosomal subunit protein bS18	rpsR	0.99	1930	2245	0
	M6282	M6282-protein682	682	*			392598	392901	0
	DW081	DW081-protein244	244	Uncharacterized protein MG028	MG028	1.01	144412	144652	0
	DW013	DW013-protein482	482	Putative phosphatase MG125	MG125	1	819	1509	1
	DW013	DW013-protein650	650	Uncharacterized protein MG440	MG440	1	810	1383	0
	DW349	DW349-protein677	677	*			501	915	1
	DW058	DW058-protein984	984	Mgp-operon protein 3	MG192	0.74	261	645	0
	DW292	DW292-protein983	983	*			383	803	1
	DW013	DW013-protein38	38	Probable DNA-directed RNA polymerase subunit delta	rpoE	1.01	3479	3692	1
	DW166	DW166-protein1008	1008	*			3	447	1
	DW079	DW079-protein887	887	*			3067	3499	0
	DW013	DW013-protein94	94	Probable nicotinate-nucleotide adenylyltransferase/Ap4A hydrolase	MG240	1.01	5049	5268	0
	DW148	DW148-protein1048	1048	*			93	510	1
	DW013	DW013-protein25	25	Oligopeptide transport system permease protein OppC	oppC	0.99	14822	15167	0
	DW013	DW013-protein31	31	Putative proline iminopeptidase	pip	1.01	856	1057	1
	DW446	DW446-protein276	276	Uncharacterized protein MG281	MG281	0.96	28367	29231	0
	DW392	DW392-protein205	205	*			39355	39814	1
	DW027	DW027-protein545	545	Uncharacterized ABC transporter permease MG468	MG468	0.99	23852	24728	0
	DW443	DW443-protein1011	1011	*			69	393	0
	DW013	DW013-protein557	557	GTPase Der	der	1	589	1936	0
	DW013	DW013-protein432	432	RNA polymerase sigma factor SigA	sigA	1.01	191	596	1
	DW041	DW041-protein1012	1012	*			267	624	0
	DW027	DW027-protein552	552	Uncharacterized protein MG313	MG313	1	860	1574	0
	DW415	DW415-protein695	695	*			40480	40915	0
	DW332	DW332-protein697	697	Adhesin P1	mgpA	0.63	31	283	1
	DW013	DW013-protein434	434	Putative tRNA methyltransferase MG248	MG248	0.99	1197	1854	1
	DW148	DW148-protein995	995	*			103	487	0
	DW027	DW027-protein605	605	Phosphoenolpyruvate-protein phosphotransferase	ptsI	1.01	11265	12012	1
	DW013	DW013-protein269	269	Major facilitator superfamily transporter MG061	MG061	1	561	1272	1
	DW428	DW428-protein1014	1014	*			65	521	0
	DW452	DW452-protein658	658	Uncharacterized lipoprotein MG412	MG412	0.74	34753	35152	0
	DW027	DW027-protein996	996	Uncharacterized protein MG381	MG381	1.01	269	614	0
	DW085	DW085-protein1010	1010	*			177	741	1
	DW013	DW013-protein87	87	Uncharacterized protein MG055	MG055	1.03	12582	12798	0
	DW013	DW013-protein222	222	2,3-bisphosphoglycerate-independent phosphoglycerate mutase	gpmI	1	2024	3548	1
	DW013	DW013-protein704	704	Uncharacterized protein MG314	MG314	1	94	688	1
	DW027	DW027-protein865	865	Uncharacterized RNA pseudouridine synthase MG370	MG370	1	550	820	1
	DW276	DW276-protein818	818	*			266	686	1
	DW013	DW013-protein675	675	Hypoxanthine-guanine phosphoribosyltransferase	hpt	1	951	1479	1
	DW121	DW121-protein1029	1029	*			28	265	1
	DW315	DW315-protein528	528	Diadenylate cyclase	dacB	1	2939	3377	1
	DW148	DW148-protein1014	1014	*			64	508	1
	DW013	DW013-protein727	727	*			576	822	0
	DW013	DW013-protein337	337	ATP synthase subunit beta	atpD	1	2626	4057	1
	DW128	DW128-protein1007	1007	*			173	536	1
	DW440	DW440-protein562	562	*			508	1210	1
	DW483	DW483-protein918	918	*			33	528	1
	DW013	DW013-protein328	328	Peptide chain release factor 1	prfA	1.02	3007	3448	0
	DW133	DW133-protein881	881	*			3332	4244	0
	DW079	DW079-protein978	978	*			482	836	0
	DW013	DW013-protein547	547	Peptide methionine sulfoxide reductase MsrB	msrB	1	2165	2369	0
	DW013	DW013-protein677	677	DNA-directed RNA polymerase subunit beta'	rpoC	0.99	232	1756	0
	DW334	DW334-protein999	999	*			58	421	0
	DW397	DW397-protein792	792	*			2778	3006	1
	DW456	DW456-protein972	972	*			38	959	0
	DW365	DW365-protein734	734	*			766	1381	0
	DW374	DW374-protein269	269	*			1235	1451	1
	DW392	DW392-protein326	326	Leucine--tRNA ligase	leuS	0.97	26404	26941	1
	DW315	DW315-protein352	352	*			591	882	1
	DW033	DW033-protein3	3	*			832	1132	0
	DW309	DW309-protein1005	1005	*			66	456	0
	DW027	DW027-protein663	663	Uncharacterized protein MG032	MG032	1.01	8434	9415	1
	DW365	DW365-protein590	590	Adhesin P1	mgpA	0.94	1031	2261	0
	DW013	DW013-protein257	257	Large ribosomal subunit protein uL15	rplO	1	4759	5212	1
	DW360	DW360-protein936	936	*			84	513	1
	DW085	DW085-protein1020	1020	*			63	456	1
	DW043	DW043-protein260	260	*			1020	1326	0
	DW483	DW483-protein927	927	*			21	270	1
	DW373	DW373-protein1035	1035	*			128	419	1
	DW433	DW433-protein1044	1044	*			9	663	1
	DW271	DW271-protein688	688	*			62	434	1
	DW033	DW033-protein595	595	Uncharacterized protein MG414	MG414	1.01	2178	2922	1
	DW322	DW322-protein589	589	*			122	347	1
	DW027	DW027-protein850	850	Uncharacterized protein MG342	MG342	1	4596	5103	1
	DW041	DW041-protein1031	1031	*			29	428	0
	DW374	DW374-protein18	18	*			17092	19222	1
	DW307	DW307-protein947	947	*			467	3314	0
	DW423	DW423-protein424	424	*			292	562	1
	DW027	DW027-protein224	224	Uncharacterized protein MG218.1	MG218.1	1.03	47285	47597	0
	DW027	DW027-protein44	44	Uncharacterized protein MG116	MG116	1	25778	26312	0
	DW483	DW483-protein810	810	*			613	1057	0
	DW013	DW013-protein718	718	Uncharacterized lipoprotein MG307	MG307	1.03	679	904	1
	DW330	DW330-protein433	433	Uncharacterized protein MG328	MG328	1	21146	22535	0
	DW013	DW013-protein419	419	UvrABC system protein A	uvrA	1.01	3099	3618	0
	DW108	DW108-protein811	811	Holliday junction resolvase RecU	recU	1	504	1005	0
	DW013	DW013-protein198	198	Uncharacterized ATP-dependent helicase MG140	MG140	1	1673	2525	1
	DW027	DW027-protein719	719	Uncharacterized protein MG409	MG409	1	9232	9910	0
	DW043	DW043-protein400	400	*			221	581	1
	DW428	DW428-protein999	999	*			255	819	1
	DW392	DW392-protein862	862	*			747	1290	1
	DW283	DW283-protein878	878	*			189	411	1
	DW013	DW013-protein33	33	Putative proline iminopeptidase	pip	1	1432	1687	1
	DW043	DW043-protein426	426	*			26	407	1
	DW013	DW013-protein48	48	Uncharacterized protein MG027	MG027	0.99	7548	7767	1
	DW374	DW374-protein24	24	*			21692	22811	0
	DW027	DW027-protein770	770	Uncharacterized protein MG354	MG354	1	11972	12386	0
	DW387	DW387-protein975	975	*			102	696	0
	DW301	DW301-protein892	892	*			58	793	0
	DW027	DW027-protein749	749	Methionyl-tRNA formyltransferase	fmt	1.01	1535	1901	0
	DW419	DW419-protein58	58	*			358	748	0
	DW273	DW273-protein481	481	*			1070	1556	1
	DW325	DW325-protein931	931	*			0	360	1
	DW013	DW013-protein959	959	*			88	292	0
	DW365	DW365-protein514	514	*			1052	1718	1
	DW013	DW013-protein829	829	Chaperone protein ClpB	clpB	1.01	139	1024	0
	DW428	DW428-protein958	958	*			104	566	1
	DW436	DW436-protein1018	1018	*			32	680	0
	DW013	DW013-protein5	5	Single-stranded DNA-binding protein	ssb	1.01	2237	2528	0
	DW397	DW397-protein941	941	*			9	474	1
	DW013	DW013-protein467	467	Uncharacterized HIT-like protein MG132	MG132	0.99	130	556	1
	DW027	DW027-protein179	179	Probable DNA helicase II homolog	uvrD	1.01	20830	21595	0
	DW013	DW013-protein594	594	Large ribosomal subunit protein uL3	rplC	0.99	957	1335	0
	DW486	DW486-protein964	964	*			426	819	0
	DW085	DW085-protein652	652	Uncharacterized protein MG447	MG447	0.89	27784	28225	1
	DW359	DW359-protein925	925	*			11	461	1
	DW292	DW292-protein1041	1041	*			49	433	0
	DW347	DW347-protein985	985	*			26	536	0
	DW013	DW013-protein739	739	Uncharacterized lipoprotein MG067	MG067	1.01	249	459	1
	DW108	DW108-protein889	889	*			336	1632	0
	DW283	DW283-protein745	745	*			833	1202	1
	DW033	DW033-protein645	645	Protein P200	MG386	1	31810	34216	1
	DW013	DW013-protein411	411	Putative ABC transporter ATP-binding protein MG187	MG187	1.03	2406	2736	0
	DW388	DW388-protein913	913	*			9684	10029	1
	DW013	DW013-protein493	493	Ribonuclease R	rnr	1.02	310	724	0
	DW033	DW033-protein641	641	GTPase Era	era	1.01	29322	29619	1
	DW430	DW430-protein990	990	*			159	597	1
	DW013	DW013-protein652	652	Uncharacterized protein MG323	MG323	1	663	1347	0
	DW013	DW013-protein1	1	Replicative DNA helicase	dnaB	1	85	793	0
	DW368	DW368-protein890	890	*			831	1188	0
	DW170	DW170-protein515	515	*			25447	25663	0
	M2321	M2321-protein914	914	Adhesin P1	mgpA	0.82	532203	532608	1
	DW442	DW442-protein965	965	*			99	405	1
	DW409	DW409-protein977	977	*			67	514	1
	DW013	DW013-protein884	884	Phenylalanine--tRNA ligase beta subunit	pheT	0.99	248	632	0
	DW013	DW013-protein611	611	Probable ribose-5-phosphate isomerase B	rpiB	0.99	286	745	0
	DW013	DW013-protein160	160	DNA ligase	ligA	1	883	1597	1
	DW290	DW290-protein999	999	*			16	397	1
	DW013	DW013-protein843	843	Uncharacterized protein MG032	MG032	1	364	607	0
	DW133	DW133-protein988	988	*			14	656	0
	DW374	DW374-protein4	4	*			2910	4122	1
	DW428	DW428-protein965	965	*			1167	1371	0
	DW290	DW290-protein153	153	*			84790	85054	1
	DW443	DW443-protein963	963	*			2593	2950	0
	DW374	DW374-protein140	140	*			2546	3158	1
	DW027	DW027-protein228	228	Cytadherence high molecular weight protein 2	hmw2	1	50593	53746	0
	DW329	DW329-protein913	913	*			259	895	0
	DW013	DW013-protein102	102	Uncharacterized protein MG242	MG242	1.02	8781	9000	1
	DW148	DW148-protein951	951	*			3807	4404	0
	DW380	DW380-protein1033	1033	*			1	256	1
	DW027	DW027-protein688	688	Chaperone protein DnaJ	dnaJ	1	5002	6172	0
	DW013	DW013-protein425	425	Dephospho-CoA kinase	coaE	1.02	3073	3352	1
	DW033	DW033-protein938	938	Uncharacterized protein MG377	MG377	1	4424	4805	1
	DW027	DW027-protein281	281	Uncharacterized ABC transporter permease MG064	MG064	1.03	17699	18194	0
	DW389	DW389-protein599	599	*			1536	1842	0
	DW013	DW013-protein895	895	Uncharacterized protein MG452	MG452	1.01	105	483	0
	DW315	DW315-protein931	931	*			62	371	1
	DW304	DW304-protein915	915	*			289	574	0
	DW374	DW374-protein2	2	phage terminase small subunit P27 family			568	1039	1
	DW027	DW027-protein1025	1025	*			58	328	0
	DW013	DW013-protein116	116	Probable cation-transporting P-type ATPase	pacL	1	8495	8891	0
	DW013	DW013-protein686	686	Ribosomal RNA small subunit methyltransferase G	rsmG	1	187	766	0
	M6489	M6489-protein317	317	*			180394	180781	0
	DW013	DW013-protein662	662	Thymidylate synthase	thyA	1.02	518	890	1
	DW129	DW129-protein1037	1037	*			643	1117	1
	DW013	DW013-protein554	554	Aspartate--tRNA ligase	aspS	1.03	452	677	0
	DW027	DW027-protein748	748	Uncharacterized protein MG366	MG366	1.01	22	964	0
	DW493	DW493-protein12	12	*			128	506	1
	DW344	DW344-protein939	939	Putative esterase/lipase 3	MG344	0.93	54	363	1
	DW085	DW085-protein995	995	*			831	1476	1
	DW129	DW129-protein1048	1048	Uncharacterized protein			154	715	0
	DW124	DW124-protein864	864	Uncharacterized lipoprotein MG321	MG321	0.98	11498	12533	0
	DW013	DW013-protein533	533	Energy-coupling factor transporter ATP-binding protein EcfA1	ecfA1	1	203	1016	0
	DW027	DW027-protein702	702	Uncharacterized protein MG012	MG012	1	14503	14992	1
	DW085	DW085-protein452	452	tRNA modification GTPase MnmE	mnmE	1	74408	75737	0
	DW419	DW419-protein121	121	*			11	680	1
	DW129	DW129-protein1002	1002	*			908	1268	1
	DW402	DW402-protein1088	1088	*			41	338	0
	DW438	DW438-protein1006	1006	*			518	932	1
	DW013	DW013-protein53	53	DNA polymerase III PolC-type	polC	1.03	10069	10273	0
	DW284	DW284-protein726	726	Mgp-operon protein 3	MG192	0.86	690	972	0
	DW353	DW353-protein76	76	*			37	337	1
	DW369	DW369-protein981	981	*			6	591	0
	DW155	DW155-protein1034	1034	*			183	639	0
	DW027	DW027-protein879	879	tRNA uridine 5-carboxymethylaminomethyl modification enzyme MnmG	mnmG	1	1295	2600	0
	DW401	DW401-protein771	771	*			459	837	1
	DW027	DW027-protein114	114	Uncharacterized protein MG076	MG076	1	66004	66421	1
	DW379	DW379-protein634	634	*			3781	4807	0
	DW331	DW331-protein854	854	Adhesin P1	mgpA	0.62	1313	1556	1
	DW077	DW077-protein1040	1040	*			13	370	1
	DW320	DW320-protein951	951	*			776	1064	0
	DW013	DW013-protein277	277	Ribosomal RNA small subunit methyltransferase I	rsmI	1	4810	5410	1
	DW013	DW013-protein165	165	Uncharacterized tRNA/rRNA methyltransferase MG252	MG252	1	4357	4663	1
	DW112	DW112-protein710	710	*			2063	4325	1
	DW013	DW013-protein778	778	Uncharacterized lipoprotein MG321	MG321	1	306	711	0
	DW489	DW489-protein961	961	*			1828	2527	0
	DW027	DW027-protein271	271	*			9528	9741	1
	DW027	DW027-protein788	788	GTPase Era	era	1	10981	11461	1
	DW027	DW027-protein547	547	Chromosomal replication initiator protein DnaA	dnaA	1	25650	26964	0
	DW398	DW398-protein899	899	*			1845	2820	0
	DW013	DW013-protein180	180	Uncharacterized lipoprotein MG040	MG040	0.99	3898	4144	1
	DW108	DW108-protein1016	1016	*			0	282	1
	DW027	DW027-protein848	848	Uncharacterized protein MG343	MG343	1	3844	4240	1
	DW013	DW013-protein51	51	Uracil phosphoribosyltransferase	upp	1	8923	9544	0
	DW374	DW374-protein275	275	*			4374	4917	1
	DW129	DW129-protein1064	1064	*			72	444	1
	DW129	DW129-protein1036	1036	*			333	1083	0
	DW433	DW433-protein479	479	*			112989	113238	0
	DW359	DW359-protein649	649	Adhesin P1	mgpA	0.77	2772	3042	1
	DW013	DW013-protein791	791	Protein MG115	MG115	1	266	740	0
	DW013	DW013-protein498	498	Uncharacterized protein MG117	MG117	1.01	504	708	1
	DW013	DW013-protein75	75	Signal recognition particle protein	ffh	1.01	6382	6718	0
	DW347	DW347-protein952	952	*			84	495	1
	DW489	DW489-protein984	984	*			3	363	0
	DW027	DW027-protein931	931	Alanine--tRNA ligase	alaS	0.99	2065	2500	0
	DW033	DW033-protein899	899	Uncharacterized protein MG422	MG422	1	778	1216	0
	DW428	DW428-protein967	967	*			561	816	1
	DW033	DW033-protein622	622	Uncharacterized protein MG397	MG397	1.02	17029	17341	1
	DW483	DW483-protein904	904	*			242	590	0
	DW342	DW342-protein434	434	Uncharacterized protein MG219	MG219	0.89	4961	5483	1
	DW283	DW283-protein800	800	*			84	513	0
	DW013	DW013-protein260	260	DNA-directed RNA polymerase subunit beta	rpoB	1.01	2524	3601	0
	DW027	DW027-protein816	816	DNA polymerase III subunit gamma/tau	dnaX	1	1825	2932	0
	DW129	DW129-protein1069	1069	*			30	423	1
	DW123	DW123-protein961	961	*			2906	3473	1
	DW079	DW079-protein941	941	Uncharacterized protein			2055	2289	0
	DW013	DW013-protein709	709	Uncharacterized protein MG356	MG356	1.01	944	1304	1
	DW148	DW148-protein973	973	*			2234	2906	1
	DW027	DW027-protein840	840	Isoleucine--tRNA ligase	ileS	1.03	879	1152	1
	DW346	DW346-protein853	853	*			4	301	1
	DW097	DW097-protein662	662	*			3466	3694	1
	DW033	DW033-protein518	518	Uncharacterized protein MG011	MG011	1.01	12712	13021	0
	DW058	DW058-protein919	919	*			5687	6101	1
	DW388	DW388-protein1010	1010	*			3	375	1
	DW312	DW312-protein971	971	*			646	1048	1
	DW013	DW013-protein92	92	Lon protease	lon	1	2665	3643	1
	DW141	DW141-protein463	463	*			2161	2419	1
	DW312	DW312-protein972	972	*			268	658	1
	DW395	DW395-protein834	834	*			495	1203	0
	DW013	DW013-protein580	580	*			9	237	0
	DW388	DW388-protein997	997	*			921	1410	1
	DW381	DW381-protein999	999	*			285	723	1
	DW402	DW402-protein1036	1036	*			239	512	0
	M6713	M6713-protein733	733	Adhesin P1	mgpA	0.69	8473	8761	1
	M6593	M6593-protein905	905	Uncharacterized protein MG302	MG302	0.98	147078	147432	0
	DW374	DW374-protein149	149	*			7678	7990	1
	DW013	DW013-protein478	478	Asparagine--tRNA ligase	asnS	1.01	1897	2131	1
	DW013	DW013-protein777	777	Transcription elongation factor GreA	greA	1	392	878	1
	DW013	DW013-protein58	58	DNA polymerase III PolC-type	polC	1.01	12331	12799	0
	DW266	DW266-protein692	692	*			406	658	0
	DW013	DW013-protein105	105	Uncharacterized protein MG242	MG242	1.01	9603	9897	1
	DW141	DW141-protein918	918	*			136	346	1
	DW304	DW304-protein177	177	Uncharacterized protein MG280	MG280	0.99	21105	21906	0
	DW290	DW290-protein887	887	*			9845	10148	1
	DW141	DW141-protein907	907	Ribonuclease 3	rnc	0.96	1	331	1
	DW013	DW013-protein132	132	Thymidylate kinase	tmk	1	7549	8182	1
	DW436	DW436-protein930	930	*			4226	4739	1
	DW374	DW374-protein146	146	*			5984	6236	1
	DW027	DW027-protein435	435	Pyruvate dehydrogenase E1 component subunit alpha	pdhA	1.01	16369	16741	1
	DW013	DW013-protein422	422	Formamidopyrimidine-DNA glycosylase	mutM	1	1234	2089	1
	DW013	DW013-protein383	383	Uncharacterized protein MG296	MG296	1	3833	4223	0
	DW372	DW372-protein978	978	*			130	706	0
	DW368	DW368-protein1000	1000	*			71	560	1
	DW446	DW446-protein978	978	*			520	1066	0
	DW121	DW121-protein983	983	*			928	1621	1
	DW027	DW027-protein533	533	Ribosomal RNA small subunit methyltransferase A	rsmA	1	16009	16789	0
	DW268	DW268-protein967	967	*			331	721	1
	DW429	DW429-protein1027	1027	*			183	474	0
	DW435	DW435-protein1048	1048	hypothetical protein			210	465	0
	DW329	DW329-protein937	937	*			618	1023	1
	DW027	DW027-protein47	47	CDP-diacylglycerol--glycerol-3-phosphate 3-phosphatidyltransferase	pgsA	1	27205	27484	0
	DW043	DW043-protein57	57	*			4111	4612	0
	DW460	DW460-protein964	964	*			2216	2885	1
	DW299	DW299-protein1028	1028	*			115	319	1
	DW058	DW058-protein990	990	*			274	679	1
	DW108	DW108-protein479	479	5-formyltetrahydrofolate cyclo-ligase	MG245	0.95	9484	10006	0
	DW299	DW299-protein989	989	*			924	1458	1
	DW458	DW458-protein951	951	*			2112	2472	0
	DW013	DW013-protein401	401	Uncharacterized protein MG350	MG350	1.01	1620	1881	0
	DW013	DW013-protein256	256	Small ribosomal subunit protein uS5	rpsE	0.99	4118	4754	1
	* unannotated ORF
