# Supplementary material for: Genomic characterisation of Mycoplasma genitalium in Victoria, Australia, reveals lineage diversification and drivers of antimicrobial resistance.
Source: Research Square preprint supplement (doi:10.21203/rs.3.rs-8547379/v1), 2026-01-19
Supplement: Supplementary file 3 [file ba824ed16904f8beeccd000c.xlsx]

## Sheet: Sheet1
	SAMPLE DETAILS										GENOTYPIC VARIATION					QUALITY CONTROL							ASSEMBLY DETAILS									CLUSTERING
	Sample ID	SRR/ERS_Accession	BioProject_Accession	Study	Read_or_assembly	Collection _year	Geo_region	Geo_country	Continent	Sample_type	Genotype_macrolide_susceptibility_allele	Genotype_Fluroquinolone _susceptibility_parC_ allele	Genotype_Fluroquinolone _susceptibility_gyrA_ allele	Genotype_Tetracycline_susceptibility_ allele	mgpB ST	Number_of_reads_mapped_to_reference	Average_depth_of_reads_to_reference	Number_of_total_reads_prefiltering	Number_of_reads_mapped_to_human_reference_post_filtering	Percentage_of_human_reads_mapped_to_human_reference_post_filtering	Percentage_kmers_M_genitalium_post_filtering_using_kraken	Percentage_reference_with_5X_coverage_using_minimap2	N50	Number of contigs	Largest contig	Assembled genome size(bp)	Genome fraction (%)	GC(%)	No of annotated CDSs	Total number of SNPs with respect to the refenece genome	BAPS_global__group	BAPS_AUS_group	Major_Clade
	DW013	SRR36444364	PRJNA1367946	This study	Reads	2021	Melbourne	Australia	Oceania	Clinical	WT	P62S	WT	C1435T	Novel_340	208318	54	2019144	16274	7.81209	68.21	93	2639	453	16900	760823	90	36	1113	1492	NA	1	A
	DW027	SRR36444363	PRJNA1367946	This study	Reads	2021	Melbourne	Australia	Oceania	Clinical	A2072G	WT	WT	T1264C	111	1032562	267	5659436	48878	4.73366	94.27	97	24559	160	87472	680355	97	34	1120	981	NA	1	B
	DW033	SRR36444218	PRJNA1367946	This study	Reads	2021	Melbourne	Australia	Oceania	Clinical	A2072G	WT	WT	A742G	4	2049962	530	3886770	13110	0.639524	99.14	98	49186	42	129016	597750	99	32	1013	1666	NA	2	B
	DW039	SRR36444207	PRJNA1367946	This study	Reads	2021	Melbourne	Australia	Oceania	Clinical	A2072G	WT	WT	WT	6	3758380	972	5445220	14098	0.375108	99.45	98	388207	18	3888207	586418	99	32	996	1156	NA	3	A
	DW041	SRR36444337	PRJNA1367946	This study	Reads	2021	Melbourne	Australia	Oceania	Clinical	A2072G	S83I	WT	C1435T_C404T	143	304546	79	1229368	11214	3.6822	96.03	95	21319	159	86824	687787	98	34	1145	1504	NA	4	B
	DW043	SRR36444326	PRJNA1367946	This study	Reads	2021	Melbourne	Australia	Oceania	Clinical	WT	WT	WT	C1435T	Novel_333	753300	195	9814818	54330	7.21227	53.81	97	1666	330	7335	410153	39	38	577	1527	NA	4	B
	DW047	SRR36444198	PRJNA1367946	This study	Reads	2021	Melbourne	Australia	Oceania	Clinical	WT	WT	WT	WT	Novel_338	300690	78	5726230	23996	7.98031	70.31	95	1339	254	8892	285253	30	38	402	560	NA	5	A
	DW050	SRR36444187	PRJNA1367946	This study	Reads	2021	Melbourne	Australia	Oceania	Clinical	A2072G	WT	WT	WT	Novel_337	1472662	381	5253540	49680	3.37348	95.95	97	19373	157	42392	670762	98	34	1147	638	NA	1	A
	DW055	SRR36444176	PRJNA1367946	This study	Reads	2021	Melbourne	Australia	Oceania	Clinical	WT	WT	WT	A644T	39	679236	176	3061838	32844	4.83543	73.73	94	4810	265	42639	660719	94	35	1014	415	NA	5	A
	DW058	SRR36444258	PRJNA1367946	This study	Reads	2021	Melbourne	Australia	Oceania	Clinical	A2071G	WT	WT	C1435T	211	910800	236	4304108	20310	2.22991	97.59	98	34828	89	86231	626869	97	33	1050	1566	NA	4	B
	DW065	SRR36444362	PRJNA1367946	This study	Reads	2021	Melbourne	Australia	Oceania	Clinical	WT	WT	WT	C1435T	3	980392	254	1696512	4074	0.415548	99.37	97	100213	39	223736	608310	100	33	1036	1537	NA	1	B
	DW077	SRR36444351	PRJNA1367946	This study	Reads	2021	Melbourne	Australia	Oceania	Clinical	A2072G	P62S	WT	WT	221	354422	92	1419514	14164	3.99637	95.69	97	21071	146	148689	689742	98	34	1174	428	NA	5	A
	DW079	SRR36444316	PRJNA1367946	This study	Reads	2021	Melbourne	Australia	Oceania	Clinical	A2072G	P62S	WT	C1435T	Novel_341	750614	194	4785672	16270	2.16756	88.03	97	17688	196	51928	700252	97	35	1069	1560	NA	1	A
	DW081	SRR36444305	PRJNA1367946	This study	Reads	2021	Melbourne	Australia	Oceania	Clinical	A2071G	WT	WT	C1435T_G450T	113	2930196	758	5630882	19306	0.658864	99.24	98	77639	40	174556	602532	99	32	1037	1281	NA	6	A
	DW085	SRR36444294	PRJNA1367946	This study	Reads	2021	Melbourne	Australia	Oceania	Clinical	A2071G	S83I	WT	WT	3	9862858	2550	15345350	44658	0.45279	94.13	98	82776	123	92684	678664	99	35	1027	650	NA	5	A
	DW088	SRR36444238	PRJNA1367946	This study	Reads	2021	Melbourne	Australia	Oceania	Clinical	WT	P62S	WT	G1019A	Novel_339	3503030	906	6536840	13886	0.3964	95.81	99	83045	33	124211	599124	99	32	1020	426	NA	5	A
	DW096	SRR36444227	PRJNA1367946	This study	Reads	2021	Melbourne	Australia	Oceania	Clinical	A2071G	WT	WT	C1435T	7	834972	216	3532000	29930	3.58455	96.01	97	27179	148	60699	655080	98	33	1099	1549	NA	4	B
	DW097	SRR36444285	PRJNA1367946	This study	Reads	2021	Melbourne	Australia	Oceania	Clinical	A2071G	WT	WT	C905T	52	249080	64	1107752	11042	4.43311	94.83	93	9168	210	44091	671163	96	34	1097	1158	NA	5	A
	DW098	SRR36444274	PRJNA1367946	This study	Reads	2021	Melbourne	Australia	Oceania	Clinical	WT	WT	WT	T416C	255	4742008	1226	5875174	7278	0.153479	99.62	98	131319	24	166714	581222	99	32	985	1248	NA	1	A
	DW100	SRR36444219	PRJNA1367946	This study	Reads	2021	Melbourne	Australia	Oceania	Clinical	WT	WT	WT	WT	6	9027522	2334	10082316	11490	0.127277	99.66	98	162076	12	189926	579403	99	32	984	1147	NA	3	A
	DW108	SRR36444217	PRJNA1367946	This study	Reads	2021	Melbourne	Australia	Oceania	Clinical	A2072G	S83I	M95I	C1435T	143	530032	137	3573188	28206	5.32	93.43	96	9306	238	43370	701454	97	34	1127	1510	NA	4	B
	DW112	SRR36444216	PRJNA1367946	This study	Reads	2021	Melbourne	Australia	Oceania	Clinical	A2072G	WT	WT	A742G	4	984240	255	4450284	67466	6.85463	92.4	97	10762	210	37375	690712	97	34	1123	1483	NA	2	B
	DW119	SRR36444215	PRJNA1367946	This study	Reads	2021	Melbourne	Australia	Oceania	Clinical	A2071G	D87N	WT	C1435T	5	2630224	680	4704544	14474	0.550295	99.24	98	42726	46	80075	592079	98	32	1020	1549	NA	4	B
	DW121	SRR36444214	PRJNA1367946	This study	Reads	2021	Melbourne	Australia	Oceania	Clinical	A2072G	S83I	WT	C462T	108	710676	184	1246476	7242	1.01903	98.77	98	59991	105	137389	672302	99	33	1138	1009	NA	3	A
	DW123	SRR36444213	PRJNA1367946	This study	Reads	2021	Melbourne	Australia	Oceania	Clinical	A2072G	WT	WT	WT	Novel_338	1199776	310	5128186	26568	2.21441	97.32	98	36352	103	83299	656011	99	33	1131	570	NA	5	A
	DW124	SRR36444212	PRJNA1367946	This study	Reads	2021	Melbourne	Australia	Oceania	Clinical	A2072G	WT	WT	G720A	2	1253758	324	2302102	13312	1.06177	97.96	98	84057	81	142243	658643	100	33	1097	369	NA	5	A
	DW128	SRR36444211	PRJNA1367946	This study	Reads	2021	Melbourne	Australia	Oceania	Clinical	A2072G	WT	WT	C1435T	3	1387332	359	1755896	5512	0.397309	99.25	98	336284	41	336284	623779	100	33	1045	964	NA	5	A
	DW129	SRR36444210	PRJNA1367946	This study	Reads	2021	Melbourne	Australia	Oceania	Clinical	A2072G	WT	WT	WT	6	3079908	796	7631434	14284	0.46378	90.46	98	85405	252	234690	854432	100	38	1087	1139	NA	3	A
	DW131	SRR36444209	PRJNA1367946	This study	Reads	2021	Melbourne	Australia	Oceania	Clinical	A2072G	WT	WT	WT	Novel_338	8588580	2221	10344562	21990	0.256038	99.42	99	51270	29	86530	593950	99	32	990	628	NA	5	A
	DW133	SRR36444208	PRJNA1367946	This study	Reads	2021	Melbourne	Australia	Oceania	Clinical	A2071G	S83I	WT	A742G	159	1305006	337	6551050	52768	4.04351	95.5	97	15499	155	41422	671089	97	34	1105	1322	NA	2	B
	DW140	SRR36444206	PRJNA1367946	This study	Reads	2021	Melbourne	Australia	Oceania	Clinical	WT	WT	WT	C1435T	Novel_324	614322	159	1516338	6178	1.00566	98.83	97	35138	76	80082	602188	98	32	1034	1185	NA	1	A
	DW141	SRR36444205	PRJNA1367946	This study	Reads	2021	Melbourne	Australia	Oceania	Clinical	A2072G	S83I	M95I	C1435T	143	1280298	331	11914708	109286	8.53598	90.31	97	3660	270	20348	613101	91	33	988	1543	NA	4	B
	DW148	SRR36444204	PRJNA1367946	This study	Reads	2021	Melbourne	Australia	Oceania	Clinical	A2072G	WT	WT	C1435T	7	2195558	568	8127650	4954	0.225637	68.76	98	27122	259	95479	813477	98	37	1153	1582	NA	4	B
	DW153	SRR36444203	PRJNA1367946	This study	Reads	2021	Melbourne	Australia	Oceania	Clinical	WT	S83I	WT	C1435T	7	6048444	1564	23535422	140052	2.3155	91.78	98	31240	166	121442	693395	98	34	1109	1556	NA	4	B
	DW155	SRR36444202	PRJNA1367946	This study	Reads	2021	Melbourne	Australia	Oceania	Clinical	A2072G	S83I	WT	C1435T	7	6843286	1770	19430642	72410	1.05812	82.62	98	51102	201	130366	771677	99	36	1147	1610	NA	4	B
	DW166	SRR36444201	PRJNA1367946	This study	Reads	2021	Melbourne	Australia	Oceania	Clinical	A2071G	S83I	WT	G1031A	Novel_344	872552	226	1853476	10328	1.18365	98.32	97	45633	80	84005	629402	98	33	1045	1465	NA	1	A
	DW167	SRR36444200	PRJNA1367946	This study	Reads	2021	Melbourne	Australia	Oceania	Clinical	WT	S83I	M95I	C1435T	106	684766	177	1350318	7062	1.0313	98.52	97	37979	74	80437	625946	99	33	1037	1531	NA	1	B
	DW170	SRR36444340	PRJNA1367946	This study	Reads	2021	Melbourne	Australia	Oceania	Clinical	A2072G	S83I	M95I	C1435T	143	535110	168	630872	982	0.183514	99.17	94	24435	79	81535	595797	98	32	981	1396	NA	4	B
	DW172	SRR36444339	PRJNA1367946	This study	Reads	2021	Melbourne	Australia	Oceania	Clinical	A2071G	D87N	WT	A742G	7	1651802	427	3807388	23962	1.45066	98.2	97	35648	81	83624	637195	98	33	1092	1344	NA	2	B
	DW266	SRR36444338	PRJNA1367946	This study	Reads	2018	Melbourne	Australia	Oceania	Clinical	A2071G	WT	WT	WT	39	858028	222	2874754	58	6.75969e-05	89.77	96	4213	222	26818	554694	89	33	892	392	NA	5	A
	DW268	SRR36444336	PRJNA1367946	This study	Reads	2018	Melbourne	Australia	Oceania	Clinical	A2072G	WT	WT	A742G	4	1987094	514	5695484	508	0.00025565	80.21	98	9170	254	45555	715855	97	36	1089	1529	NA	2	B
	DW269	SRR36444335	PRJNA1367946	This study	Reads	2019	Melbourne	Australia	Oceania	Clinical	A2072G	WT	WT	A742G	4	218558	57	473240	28	0.000128112	98.39	93	7198	168	42731	586392	95	32	979	1431	NA	2	B
	DW270	SRR36444334	PRJNA1367946	This study	Reads	2019	Melbourne	Australia	Oceania	Clinical	WT	WT	WT	WT	4	2693668	697	4578244	142	5.27162e-05	96.23	98	30875	69	81626	605889	98	32	1034	1545	NA	2	B
	DW271	SRR36444333	PRJNA1367946	This study	Reads	2019	Melbourne	Australia	Oceania	Clinical	A2072G	WT	WT	C1435T	4	617724	160	6743486	214	0.000346433	83.01	96	1966	330	7098	506678	78	33	868	1276	NA	2	B
	DW272	SRR36444332	PRJNA1367946	This study	Reads	2019	Melbourne	Australia	Oceania	Clinical	A2071G	S83I	WT	A742G	159	622156	161	823826	78	0.00012537	98.6	96	23754	76	81694	587267	98	32	986	1284	NA	2	B
	DW273	SRR36444331	PRJNA1367946	This study	Reads	2020	Melbourne	Australia	Oceania	Clinical	A2072G	WT	WT	C1435T	7	991884	256	8416664	154	0.00015526	66.81	96	2042	297	11864	504494	72	35	751	1671	NA	4	B
	DW276	SRR36444330	PRJNA1367946	This study	Reads	2020	Melbourne	Australia	Oceania	Clinical	A2072G	WT	WT	WT	6	733962	190	3197602	162	0.00022072	91.62	96	6691	189	26383	600021	94	33	1016	1071	NA	3	A
	DW277	SRR36444329	PRJNA1367946	This study	Reads	2020	Melbourne	Australia	Oceania	Clinical	A2072G	WT	WT	C1435T	113	996498	258	2163234	1022	0.00102559	97.03	97	13100	114	45602	607410	97	32	1061	1094	NA	6	A
	DW278	SRR36444328	PRJNA1367946	This study	Reads	2020	Melbourne	Australia	Oceania	Clinical	A2072G	S83I	WT	C462T	108	763830	198	2748280	120	0.000157103	96.86	96	4361	214	20958	559774	90	33	940	1003	NA	3	A
	DW279	SRR36444327	PRJNA1367946	This study	Reads	2020	Melbourne	Australia	Oceania	Clinical	A2071G	S83I	M95I	C1435T	143	1836264	475	5414012	784	0.000426954	91.22	98	13004	130	92815	625052	97	33	1058	1606	NA	4	B
	DW281	SRR36444325	PRJNA1367946	This study	Reads	2020	Melbourne	Australia	Oceania	Clinical	A2072G	S83I_ D87N	WT	C1435T	77	2114370	547	4232688	958	0.00045309	96.92	98	16019	96	46764	607368	97	33	1038	1534	NA	4	B
	DW282	SRR36444324	PRJNA1367946	This study	Reads	2020	Melbourne	Australia	Oceania	Clinical	A2072G	WT	WT	WT	4	347356	90	1228124	42	0.000120913	96.43	94	5543	191	29797	597296	94	33	1018	1171	NA	5	A
	DW283	SRR36444323	PRJNA1367946	This study	Reads	2020	Melbourne	Australia	Oceania	Clinical	A2072G	S83I	WT	C462T	108	8471088	2191	3982302	1516	0.000178962	52.94	98	3163	371	20864	698540	90	37	1036	1021	NA	3	A
	DW284	SRR36444322	PRJNA1367946	This study	Reads	2020	Melbourne	Australia	Oceania	Clinical	A2072G	WT	WT	C1435T	52	832328	215	2830396	466	0.000559875	96.24	96	3989	230	18067	544795	88	33	893	960	NA	5	A
	DW285	SRR36444321	PRJNA1367946	This study	Reads	2020	Melbourne	Australia	Oceania	Clinical	A2072G	WT	WT	A742G	Novel_327	4929600	1275	7544194	976	0.000197988	98.43	98	22443	80	45581	598154	98	32	1036	1539	NA	2	B
	DW286	SRR36444320	PRJNA1367946	This study	Reads	2020	Melbourne	Australia	Oceania	Clinical	A2072G	S83I	M95I	C1435T	143	369378	96	795016	528	0.00142943	87.47	92	5480	198	26635	563117	91	33	914	1444	NA	4	B
	DW287	SRR36444319	PRJNA1367946	This study	Reads	2020	Melbourne	Australia	Oceania	Clinical	A2072G	S83I	WT	C462T	108	915086	237	6546434	402	0.000439303	89.01	97	3573	288	14749	612305	91	34	1059	997	NA	3	A
	DW289	SRR36444318	PRJNA1367946	This study	Reads	2020	Melbourne	Australia	Oceania	Clinical	A2072G	WT	WT	C1435T	52	1416888	366	8415388	302	0.000213143	96.44	97	2601	292	15668	555543	88	33	932	1430	NA	1	A
	DW290	SRR36444317	PRJNA1367946	This study	Reads	2020	Melbourne	Australia	Oceania	Clinical	WT	WT	WT	WT	Novel_335	454662	118	1881440	182	0.000400297	97.81	98	40477	118	85621	653331	99	34	1080	228	NA	5	A
	DW292	SRR36444199	PRJNA1367946	This study	Reads	2020	Melbourne	Australia	Oceania	Clinical	A2072G	WT	WT	WT	4	1105354	286	5235394	12	1.08563e-05	57.04	98	6450	439	45630	890960	97	39	1093	1513	NA	2	B
	DW293	SRR36444197	PRJNA1367946	This study	Reads	2020	Melbourne	Australia	Oceania	Clinical	A2071G	WT	WT	C1435T_G450T	113	1591738	412	3005402	1120	0.000703633	98.39	97	6733	154	46751	575267	94	32	991	1250	NA	6	A
	DW295	SRR36444196	PRJNA1367946	This study	Reads	2020	Melbourne	Australia	Oceania	Clinical	A2072G	WT	WT	C1435T_G200A	113	816012	211	1659434	504	0.000617638	98.38	98	44905	53	167837	615629	98	33	1029	1219	NA	6	A
	DW296	SRR36444195	PRJNA1367946	This study	Reads	2020	Melbourne	Australia	Oceania	Clinical	A2071G	WT	WT	C1435T_G450T	113	1400436	362	1798282	836	0.000596957	99.19	98	23265	94	45097	588849	97	32	993	1260	NA	6	A
	DW299	SRR36444194	PRJNA1367946	This study	Reads	2020	Melbourne	Australia	Oceania	Clinical	A2072G	S83I	WT	C1435T	143	1638850	424	3778754	762	0.00046496	93.48	98	45548	109	218315	690069	99	34	1032	1573	NA	4	B
	DW301	SRR36444193	PRJNA1367946	This study	Reads	2020	Melbourne	Australia	Oceania	Clinical	A2071G	WT	WT	C1435T	7	593792	154	1935314	630	0.00106098	97.07	97	7351	162	26059	591186	95	32	1019	1548	NA	4	B
	DW303	SRR36444192	PRJNA1367946	This study	Reads	2020	Melbourne	Australia	Oceania	Clinical	A2072G	WT	WT	WT	5	646326	167	2016560	292	0.000451784	98.47	98	49175	111	118298	645905	99	33	1069	329	NA	5	A
	DW304	SRR36444191	PRJNA1367946	This study	Reads	2020	Melbourne	Australia	Oceania	Clinical	WT	D87N	WT	C1435T	4	498322	129	1776048	606	0.00121608	97.76	97	7906	147	40172	596111	96	32	1032	1539	NA	1	B
	DW305	SRR36444190	PRJNA1367946	This study	Reads	2020	Melbourne	Australia	Oceania	Clinical	A2072G	WT	WT	C1435T	52	318252	82	1331942	178	0.000559305	95.12	92	3136	265	14409	538890	87	33	887	874	NA	5	A
	DW307	SRR36444189	PRJNA1367946	This study	Reads	2020	Melbourne	Australia	Oceania	Clinical	A2072G	S83I	WT	C1435T	7	794162	205	2909414	948	0.00119371	94.62	98	27691	104	81573	624510	98	33	1055	1565	NA	4	B
	DW308	SRR36444188	PRJNA1367946	This study	Reads	2020	Melbourne	Australia	Oceania	Clinical	A2072G	WT	WT	C1435T	7	3459068	894.469	4124058	3934	0.0011373	99.4	98.099	15629	73	81237	581803	98	32	995	1585	NA	4	B
	DW309	SRR36444186	PRJNA1367946	This study	Reads	2020	Melbourne	Australia	Oceania	Clinical	A2072G	WT	WT	C1435T	7	369082	95.4397	2462136	264	0.000715288	96.79	97.2747	23728	169	90697	648985	97	34	1044	1510	NA	4	B
	DW310	SRR36444185	PRJNA1367946	This study	Reads	2020	Melbourne	Australia	Oceania	Clinical	A2071G	WT	WT	C1435T_G450T	113	1198070	309.805	5045092	1208	0.00100829	94.47	97.0564	3510	256	15475	561010	89	33	898	1239	NA	6	A
	DW311	SRR36444184	PRJNA1367946	This study	Reads	2020	Melbourne	Australia	Oceania	Clinical	A2072G	S83I	WT	C462T	108	252788	65.3676	1319782	162	0.000640853	94.39	90.6385	2513	284	13127	527765	83	33	885	913	NA	3	A
	DW312	SRR36444183	PRJNA1367946	This study	Reads	2020	Melbourne	Australia	Oceania	Clinical	A2071G	WT	WT	A644T	39	318460	82.3496	1698484	118	0.000370533	96.98	98.0573	36286	148	67333	652148	98	33	1048	470	NA	5	A
	DW313	SRR36444182	PRJNA1367946	This study	Reads	2020	Melbourne	Australia	Oceania	Clinical	A2071G	WT	WT	A742G	4	1625062	420.22	3315968	420	0.000258452	97.79	97.1642	6296	179	35209	579453	93	33	978	1651	NA	2	B
	DW315	SRR36444181	PRJNA1367946	This study	Reads	2020	Melbourne	Australia	Oceania	Clinical	WT	WT	WT	WT	na	635148	164.241	1264174	218	0.000343227	97.98	96.2286	7844	158	19268	580770	95	33	953	453	NA	5	A
	DW316	SRR36444180	PRJNA1367946	This study	Reads	2020	Melbourne	Australia	Oceania	Clinical	A2072G	S83I	WT	C1435T	7	1362550	352.337	2143278	1022	0.000750064	98.8	97.3674	11764	100	46728	584487	96	32	989	1570	NA	4	B
	DW318	SRR36444179	PRJNA1367946	This study	Reads	2020	Melbourne	Australia	Oceania	Clinical	A2072G	WT	WT	C1435T	113	475676	123.004	3028384	222	0.000466704	96.72	97.7763	27393	125	79249	629974	97	33	1060	1205	NA	6	A
	DW320	SRR36444178	PRJNA1367946	This study	Reads	2020	Melbourne	Australia	Oceania	Clinical	A2072G	S83I	WT	C462T	108	6046190	1563.46	11842698	692	0.000114452	83.01	98.0523	14815	177	47982	681855	97	35	1002	1038	NA	3	A
	DW321	SRR36444177	PRJNA1367946	This study	Reads	2020	Melbourne	Australia	Oceania	Clinical	A2072G	S83I	WT	C462T	108	7896062	2041.82	8470040	1032	0.000130698	99.33	98.169	34806	45	83482	582117	99	32	972	1054	NA	3	A
	DW322	SRR36444268	PRJNA1367946	This study	Reads	2020	Melbourne	Australia	Oceania	Clinical	WT	WT	WT	C1435T	7	520564	134.611	4185680	202	0.000388041	86.15	94.9134	2869	292	15697	566647	86	33	957	1499	NA	4	B
	DW325	SRR36444267	PRJNA1367946	This study	Reads	2020	Melbourne	Australia	Oceania	Clinical	A2072G	WT	WT	C1435T	95	405626	104.89	3412472	182	0.000448689	90.31	96.9669	7949	205	45290	612325	92	34	962	1577	NA	4	B
	DW326	SRR36444266	PRJNA1367946	This study	Reads	2020	Melbourne	Australia	Oceania	Clinical	A2072G	S83I	WT	C462T	108	1968498	509.028	2400912	446	0.000226569	98.62	97.7146	32594	52	80712	589400	99	32	989	1022	NA	3	A
	DW329	SRR36444265	PRJNA1367946	This study	Reads	2021	Melbourne	Australia	Oceania	Clinical	A2071G	D87N	WT	C1435T_A795G	211	2684922	694.285	3905084	1478	0.000550482	94.58	97.9251	12852	177	12852	655693	97	35	1000	1668	NA	4	B
	DW330	SRR36444264	PRJNA1367946	This study	Reads	2021	Melbourne	Australia	Oceania	Clinical	A2071G	WT	WT	A742G_C1308T	4	480638	124.287	827960	144	0.000299602	98.55	97.3438	99299	53	121415	627779	99	33	1033	1619	NA	2	B
	DW331	SRR36444263	PRJNA1367946	This study	Reads	2021	Melbourne	Australia	Oceania	Clinical	A2072G	D87N	WT	C1435T	7	1666210	430.86	2825894	840	0.000504138	98.67	97.7005	15157	99	52257	583401	96	32	1005	1555	NA	4	B
	DW332	SRR36444262	PRJNA1367946	This study	Reads	2021	Melbourne	Australia	Oceania	Clinical	A2072G	S83I	WT	C462T	108	1177994	304.614	1608110	334	0.000283533	99.3	97.5353	19469	78	45852	586160	96	32	1000	1038	NA	3	A
	DW334	SRR36444261	PRJNA1367946	This study	Reads	2022	Melbourne	Australia	Oceania	Clinical	A2072G	WT	WT	A742G	4	1235742	319.547	2901546	70	5.66461e-05	91.96	98.1304	57580	136	167740	702509	99	35	1050	1558	NA	2	B
	DW336	SRR36444260	PRJNA1367946	This study	Reads	2022	Melbourne	Australia	Oceania	Clinical	A2072G	S83I	WT	C462T	108	1176218	304.154	2074676	368	0.000312867	98.75	97.6158	13944	106	44784	584114	96	32	992	1063	NA	3	A
	DW337	SRR36444259	PRJNA1367946	This study	Reads	2022	Melbourne	Australia	Oceania	Clinical	A2072G	WT	WT	C1435T	52	324802	83.9895	1127822	132	0.000406401	96.69	94.6585	6342	174	28868	586671	93	33	1003	919	NA	5	A
	DW339	SRR36444257	PRJNA1367946	This study	Reads	2022	Melbourne	Australia	Oceania	Clinical	A2071G	WT	WT	C1435T	211	2454036	634.581	5600660	1504	0.000612868	97.4	97.7527	17517	99	46850	613218	97	32	1075	1620	NA	4	B
	DW341	SRR36444256	PRJNA1367946	This study	Reads	2020	Melbourne	Australia	Oceania	Clinical	A2071G	S83I	WT	A742G_C609T,	159	588854	152.27	2221234	68	0.000115479	96.11	94.7774	3476	228	21967	538569	87	33	881	1302	NA	2	B
	DW342	SRR36444255	PRJNA1367946	This study	Reads	2020	Melbourne	Australia	Oceania	Clinical	A2072G	WT	WT	T1264C	111	360442	93.2055	672134	2	5.54874e-06	97.93	92.8459	5598	172	33881	570739	94	32	956	967	NA	1	B
	DW344	SRR36444254	PRJNA1367946	This study	Reads	2021	Melbourne	Australia	Oceania	Clinical	A2072G	S83I	WT	C462T	108	3811754	985.669	5466558	2332	0.000611792	98.93	97.9334	9490	134	44538	567610	95	32	966	1056	NA	3	A
	DW345	SRR36444253	PRJNA1367946	This study	Reads	2021	Melbourne	Australia	Oceania	Clinical	A2072G	WT	WT	C1435T	52	16080114	4158.11	2031426	17430	0.00108395	99.15	98.3659	10019	111	44814	567518	95	32	950	1009	NA	5	A
	DW346	SRR36444252	PRJNA1367946	This study	Reads	2020	Melbourne	Australia	Oceania	Clinical	A2072G	S83I	M95I	C1435T	143	426324	110.242	2297428	7960	1.86712	87.23	96	6830	219	26972	648053	94	34	1088	1546	NA	4	B
	DW347	SRR36444251	PRJNA1367946	This study	Reads	2021	Melbourne	Australia	Oceania	Clinical	A2072G	WT	WT	C1435T	7	1006392	260.24	3552220	9994	0.993052	94.55	98	12754	216	46784	714254	96	35	1162	1617	NA	4	B
	DW349	SRR36444250	PRJNA1367946	This study	Reads	2021	Melbourne	Australia	Oceania	Clinical	WT	WT	WT	C1435T	7	204788	52.9555	1452388	5706	2.7863	96.84	94	4019	250	24490	615288	90	34	1057	1479	NA	4	B
	DW351	SRR36444249	PRJNA1367946	This study	Reads	2020	Melbourne	Australia	Oceania	Clinical	A2072G	S83I	M95I	C1435T	143	313436	81.0504	2041998	12392	3.9536	95.55	95	4204	263	30022	635299	92	34	1149	1463	NA	4	B
	DW353	SRR36444248	PRJNA1367946	This study	Reads	2020	Melbourne	Australia	Oceania	Clinical	WT	D87N	WT	C1435T	7	206012	53.272	1715636	6142	2.98138	79.46	92	2897	318	14310	623459	84	35	904	1431	NA	4	B
	DW354	SRR36444361	PRJNA1367946	This study	Reads	2020	Melbourne	Australia	Oceania	Clinical	A2072G	WT	WT	A742G	Novel_343	405718	104.913	1561506	6172	1.52125	97.9	97	8839	171	45468	655609	97	34	1131	1487	NA	2	B
	DW355	SRR36444360	PRJNA1367946	This study	Reads	2021	Melbourne	Australia	Oceania	Clinical	A2071G	WT	WT	C1435T	7	548324	141.789	2266560	10604	1.93389	97.79	97	10813	153	43467	653894	95	34	1101	1545	NA	4	B
	DW356	SRR36444359	PRJNA1367946	This study	Reads	2020	Melbourne	Australia	Oceania	Clinical	A2071G	WT	WT	C1435T_G450T	113	745398	192.75	1693164	5550	0.744569	98.39	98	27510	81	83630	634938	99	33	1055	1273	NA	6	A
	DW359	SRR36444358	PRJNA1367946	This study	Reads	2021	Melbourne	Australia	Oceania	Clinical	A2072G	S83I	M95I	C1435T	Novel_336	239612	61.9605	1464942	7520	3.13841	96.54	95	5746	226	52771	642315	93	34	1129	1535	NA	4	B
	DW360	SRR36444357	PRJNA1367946	This study	Reads	2021	Melbourne	Australia	Oceania	Clinical	A2072G	WT	WT	WT	Novel_338	1315476	340.165	5145264	14588	1.10895	98.64	98	13971	150	45528	642564	97	33	1095	625	NA	5	A
	DW361	SRR36444356	PRJNA1367946	This study	Reads	2021	Melbourne	Australia	Oceania	Clinical	A2072G	S83I	WT	C462T	108	415532	107.451	1979490	9620	2.3151	97.38	96	7242	196	44684	642308	94	33	1133	998	NA	3	A
	DW365	SRR36444355	PRJNA1367946	This study	Reads	2020	Melbourne	Australia	Oceania	Clinical	WT	WT	WT	C1435T	7	202580	52.3845	1587720	6486	3.2017	96.48	94	4036	280	38444	617071	89	34	1179	1451	NA	4	B
	DW366	SRR36444354	PRJNA1367946	This study	Reads	2018	Melbourne	Australia	Oceania	Clinical	A2072G	WT	WT	A742G	4	22467420	5809.78	25595180	17956	0.000799202	99.59	99.3078	98216	21	582951	582951	99	32	1016	1537	NA	2	B
	DW368	SRR36444353	PRJNA1367946	This study	Reads	2020	Melbourne	Australia	Oceania	Clinical	WT	WT	WT	C1435T	Novel_334	5863132	1516.13	26406730	116306	0.0198368	97.27	98.2969	10633	254	83977	728399	97	35	1248	1379	NA	1	B
	DW369	SRR36444352	PRJNA1367946	This study	Reads	2021	Melbourne	Australia	Oceania	Clinical	A2072G	WT	WT	T1264C	111	2929362	757.494	10541664	29602	0.0101053	98.67	95.9902	19435	233	90740	707975	97	35	1224	916	NA	1	B
	DW370	SRR36444350	PRJNA1367946	This study	Reads	2021	Melbourne	Australia	Oceania	Clinical	A2071G	WT	WT	C1435T	Novel_345	5059126	1308.22	49268246	110766	0.0218943	86.29	97.5874	4424	287	27487	653050	91	35	1021	1496	NA	4	B
	DW371	SRR36444349	PRJNA1367946	This study	Reads	2022	Melbourne	Australia	Oceania	Clinical	WT	WT	WT	WT	221	12635096	3267.27	39186506	52094	0.00412296	98.27	99.2985	34313	180	79579	679642	98	34	1108	430	NA	5	A
	DW372	SRR36444348	PRJNA1367946	This study	Reads	2022	Melbourne	Australia	Oceania	Clinical	A2071G	WT	WT	A742G	7	8281068	2141.37	9923734	9624	0.00116217	99.54	98.7571	37975	45	81635	592539	98	32	1028	1310	NA	2	B
	DW373	SRR36444347	PRJNA1367946	This study	Reads	2019	Melbourne	Australia	Oceania	Clinical	A2072G	WT	WT	C1435T	4	3785832	978.966	10661368	37442	0.00989003	98.43	97.7577	18180	212	80916	698205	97	35	1202	1251	NA	2	B
	DW374	SRR36444346	PRJNA1367946	This study	Reads	2019	Melbourne	Australia	Oceania	Clinical	A2072G	S83I	WT	C1435T_G260A	143	5949568	1538.48	76630338	82180	0.0138128	77.75	98.3228	2658	371	24023	660508	84	35	960	1551	NA	4	B
	DW375	SRR36444345	PRJNA1367946	This study	Reads	2019	Melbourne	Australia	Oceania	Clinical	A2071G	S83I	WT	A742G	159	3265932	844.527	14945426	39788	0.0121827	94.33	97.4567	14986	270	80788	751263	96	36	1209	1261	NA	2	B
	DW376	SRR36444344	PRJNA1367946	This study	Reads	2019	Melbourne	Australia	Oceania	Clinical	WT	WT	WT	C1435T	7	2974084	769.059	3496864	1836	0.000617333	99.56	96.6885	34834	46	66244	576949	97	32	990	1497	NA	4	B
	DW377	SRR36444343	PRJNA1367946	This study	Reads	2020	Melbourne	Australia	Oceania	Clinical	A2071G	S83I	WT	WT	3	22379972	5787.17	48647094	9670	0.000432083	96.69	99.3151	37244	135	85092	690118	98	35	1027	579	NA	5	A
	DW379	SRR36444342	PRJNA1367946	This study	Reads	2019	Melbourne	Australia	Oceania	Clinical	A2072G	WT	WT	A742G	4	2589074	669.5	19704844	55340	0.0213744	97.55	97.2012	7534	270	34789	697848	97	34	1161	1460	NA	2	B
	DW380	SRR36444341	PRJNA1367946	This study	Reads	2020	Melbourne	Australia	Oceania	Clinical	A2072G	WT	WT	A742G	4	9180744	2374.02	35929490	76240	0.00830434	98.79	98.937	35701	108	80129	640039	97	33	1150	1485	NA	2	B
	DW381	SRR36444315	PRJNA1367946	This study	Reads	2020	Melbourne	Australia	Oceania	Clinical	A2072G	WT	WT	WT	Novel_338	5399206	1396.16	11422426	32906	0.0060946	99.16	98.8141	35444	216	90755	715452	98	35	1195	512	NA	5	A
	DW382	SRR36444314	PRJNA1367946	This study	Reads	2020	Melbourne	Australia	Oceania	Clinical	A2072G	WT	WT	C1435T	106	7499270	1939.21	19438544	91266	0.01217	98.27	98.5935	30518	121	82330	660533	97	34	1158	1200	NA	1	A
	DW383	SRR36444313	PRJNA1367946	This study	Reads	2020	Melbourne	Australia	Oceania	Clinical	A2071G	WT	WT	A644T	113	11205024	2897.47	24974528	25484	0.00227434	96.15	99.3103	44900	176	91929	710284	98	35	1147	798	NA	6	A
	DW384	SRR36444312	PRJNA1367946	This study	Reads	2020	Melbourne	Australia	Oceania	Clinical	A2072G	S83I	WT	C1435T	7	7186124	1858.24	17228630	85006	0.0118292	98.51	98.4912	27744	190	81609	700515	98	34	1218	1529	NA	4	B
	DW385	SRR36444311	PRJNA1367946	This study	Reads	2020	Melbourne	Australia	Oceania	Clinical	A2072G	WT	WT	WT	Novel_338	24032780	6214.56	30612026	15966	0.000664343	98.51	99.5128	80389	48	140388	607514	98	33	1006	571	NA	5	A
	DW386	SRR36444310	PRJNA1367946	This study	Reads	2020	Melbourne	Australia	Oceania	Clinical	A2072G	WT	WT	WT	Novel_338	3851404	995.922	68681214	25072	0.00650983	55.97	97.8686	1235	198	5440	226555	33	36	378	494	NA	5	A
	DW387	SRR36444309	PRJNA1367946	This study	Reads	2020	Melbourne	Australia	Oceania	Clinical	WT	P62S	WT	WT	8	3131366	809.73	8612738	33536	0.0107097	98.65	98.5866	31160	232	81563	740558	98	35	1244	1549	NA	2	B
	DW388	SRR36444308	PRJNA1367946	This study	Reads	2020	Melbourne	Australia	Oceania	Clinical	A2071G	S83I	WT	WT	3	11865868	3068.36	20611516	41254	0.00347669	99.27	99.1861	40532	129	166558	673474	98	34	1168	590	NA	5	A
	DW389	SRR36444307	PRJNA1367946	This study	Reads	2020	Melbourne	Australia	Oceania	Clinical	WT	WT	WT	C1435T	3	2531366	654.578	15146846	45592	0.0180108	97.79	98.2349	11557	273	52431	738050	96	35	1221	1359	NA	1	B
	DW390	SRR36444306	PRJNA1367946	This study	Reads	2020	Melbourne	Australia	Oceania	Clinical	WT	WT	WT	C1435T_C452T	7	4046214	1046.3	12748150	34438	0.00851117	98.91	98.7214	34297	184	120800	712778	98	34	1225	1525	NA	4	B
	DW391	SRR36444304	PRJNA1367946	This study	Reads	2020	Melbourne	Australia	Oceania	Clinical	WT	WT	WT	C1435T_C452T	7	5574390	1441.46	11935920	30692	0.00550589	99.25	98.8941	35419	177	80356	701338	98	34	1202	1534	NA	4	B
	DW392	SRR36444303	PRJNA1367946	This study	Reads	2020	Melbourne	Australia	Oceania	Clinical	A2072G	S83I	WT	C1435T	7	2769440	716.141	12269260	45512	0.0164336	98.08	98.298	17578	269	80667	742146	97	35	1359	1503	NA	4	B
	DW394	SRR36444302	PRJNA1367946	This study	Reads	2020	Melbourne	Australia	Oceania	Clinical	A2071G	WT	WT	WT	255	10091404	2609.5	181868494	16356	0.00162079	51.61	98.754	1379	172	3912	209610	29	37	307	1153	NA	1	A
	DW395	SRR36444301	PRJNA1367946	This study	Reads	2020	Melbourne	Australia	Oceania	Clinical	WT	WT	WT	WT	Novel_325	1107332	286.341	10752356	30942	0.0279428	89.08	94.423	3465	413	17777	780131	91	37	1217	176	NA	5	A
	DW396	SRR36444300	PRJNA1367946	This study	Reads	2020	Melbourne	Australia	Oceania	Clinical	A2071G	P62S	WT	A742G	8	2359822	610.219	16721866	46406	0.019665	88.27	98.1318	13606	232	55739	681829	91	35	1116	1702	NA	2	B
	DW397	SRR36444299	PRJNA1367946	This study	Reads	2020	Melbourne	Australia	Oceania	Clinical	A2072G	S83I	WT	C1435T	7	3205466	828.891	29001996	192704	0.0601173	92.94	98.4006	7400	273	39028	698573	94	35	1143	1515	NA	4	B
	DW398	SRR36444298	PRJNA1367946	This study	Reads	2020	Melbourne	Australia	Oceania	Clinical	A2072G	S83I	M95I	C1435T	106	2267054	586.23	8706466	43850	0.0193423	97.61	97.9932	23000	216	64794	724390	97	35	1251	1538	NA	1	B
	DW401	SRR36444297	PRJNA1367946	This study	Reads	2020	Melbourne	Australia	Oceania	Clinical	A2072G	S83I	WT	C1435T	143	1882828	486.874	25577458	22664	0.0120372	98.53	97.7008	4506	272	21652	622111	89	34	1021	1533	NA	4	B
	DW402	SRR36444296	PRJNA1367946	This study	Reads	2020	Melbourne	Australia	Oceania	Clinical	A2072G	WT	WT	WT	6	2021016	522.608	10196422	37458	0.0185342	97.86	97.7506	24469	292	86696	763472	97	36	1302	1057	NA	3	A
	DW405	SRR36444295	PRJNA1367946	This study	Reads	2020	Melbourne	Australia	Oceania	Clinical	A2071G	P62S	WT	WT	Novel_332	981462	253.793	8432320	11674	0.0118945	81.91	92.1934	3520	320	18169	672849	90	35	1017	1603	NA	2	B
	DW409	SRR36444293	PRJNA1367946	This study	Reads	2020	Melbourne	Australia	Oceania	Clinical	WT	WT	WT	C1435T	12	1563020	404.176	4202168	14924	0.00954818	98.61	92.7609	15307	194	47918	678972	97	34	1166	883	NA	5	A
	DW410	SRR36444247	PRJNA1367946	This study	Reads	2020	Melbourne	Australia	Oceania	Clinical	WT	WT	WT	C1435T	7	1702042	440.126	3110168	16344	0.00960258	98.21	91.5858	11278	124	57014	597996	95	33	1042	1360	NA	4	B
	DW413	SRR36444246	PRJNA1367946	This study	Reads	2021	Melbourne	Australia	Oceania	Clinical	WT	WT	WT	C1435T_C452T	7	2433106	629.169	3390004	8572	0.00352307	99.24	96.4994	31073	65	80059	609143	98	33	1040	1472	NA	4	B
	DW414	SRR36444245	PRJNA1367946	This study	Reads	2021	Melbourne	Australia	Oceania	Clinical	A2071G	WT	WT	C1435T	7	1993598	515.518	19303542	83226	0.0417466	95.36	95.5425	3910	316	19858	661058	92	34	1138	1434	NA	4	B
	DW415	SRR36444244	PRJNA1367946	This study	Reads	2021	Melbourne	Australia	Oceania	Clinical	A2071G	WT	WT	C1435T	211	10637960	2750.84	18009128	56514	0.00531248	99.07	99.1022	84097	61	150102	630959	98	33	1100	1565	NA	4	B
	DW418	SRR36444243	PRJNA1367946	This study	Reads	2021	Melbourne	Australia	Oceania	Clinical	A2072G	S83I	M95I	C1435T	143	6128094	1584.64	8963680	17140	0.00279695	99.29	98.4771	35971	66	79631	611304	98	32	1054	1491	NA	4	B
	DW419	SRR36444242	PRJNA1367946	This study	Reads	2022	Melbourne	Australia	Oceania	Clinical	WT	WT	WT	WT	143	2157502	557.902	47616394	35776	0.0165821	63.76	91.5911	1121	212	5021	218963	18	39	296	369	NA	5	A
	DW420	SRR36444241	PRJNA1367946	This study	Reads	2021	Melbourne	Australia	Oceania	Clinical	A2072G	S83I	WT	C462T	Novel_324	1770890	457.929	2247332	5234	0.00295558	99.2	93.1657	10544	107	45805	582168	96	32	1019	878	NA	3	A
	DW423	SRR36444240	PRJNA1367946	This study	Reads	2019	Melbourne	Australia	Oceania	Clinical	A2072G	P62S	WT	WT	108	2891784	747.777	5107934	11194	0.00387097	99.13	97.1973	37041	90	85100	632352	98	33	1093	1044	NA	3	A
	DW425	SRR36444239	PRJNA1367946	This study	Reads	2020	Melbourne	Australia	Oceania	Clinical	A2072G	S83I	WT	C1435T	143	3068420	793.453	19125562	72810	0.0237288	95.67	97.7893	11226	234	42165	711118	96	35	1168	1492	NA	4	B
	DW427	SRR36444237	PRJNA1367946	This study	Reads	2020	Melbourne	Australia	Oceania	Clinical	WT	WT	WT	C1435T	7	5764892	1490.73	7808304	16516	0.00286493	99.26	98.749	39369	59	86007	617701	98	33	1064	1512	NA	4	B
	DW428	SRR36444236	PRJNA1367946	This study	Reads	2019	Melbourne	Australia	Oceania	Clinical	A2072G	WT	WT	WT	4	7127934	1843.19	30179826	8728	0.00122448	81.05	99.0856	23215	248	80995	770008	98	36	1152	1507	NA	2	B
	DW429	SRR36444235	PRJNA1367946	This study	Reads	2019	Melbourne	Australia	Oceania	Clinical	A2072G	S83I	WT	C1435T	N/A	4673880	1208.6	18661738	73604	0.0157479	97.93	98.5462	19145	236	80851	735899	97	35	1235	1565	NA	1	B
	DW430	SRR36444234	PRJNA1367946	This study	Reads	2020	Melbourne	Australia	Oceania	Clinical	A2072G	S83I	WT	C462T	108	6715266	1736.48	32496980	4464	0.000664754	81.17	98.8257	16476	210	44943	731370	98	36	1090	980	NA	3	A
	DW432	SRR36444233	PRJNA1367946	This study	Reads	2020	Melbourne	Australia	Oceania	Clinical	A2071G	WT	WT	WT	210	6050210	1564.5	9752824	26032	0.00430266	99.04	98.9	53933	75	123539	634322	99	33	1091	68	NA	5	A
	DW433	SRR36444232	PRJNA1367946	This study	Reads	2020	Melbourne	Australia	Oceania	Clinical	A2072G	D87N	WT	C1435T	3	6285840	1625.44	16940682	52600	0.00836801	98.77	99.1349	60246	244	167473	764521	99	35	1256	1258	NA	6	A
	DW434	SRR36444231	PRJNA1367946	This study	Reads	2020	Melbourne	Australia	Oceania	Clinical	A2072G	WT	WT	WT	Novel_338	17768562	4594.72	24039766	50662	0.00285122	99.22	99.5249	63175	67	149691	621146	97	33	1052	576	NA	5	A
	DW435	SRR36444230	PRJNA1367946	This study	Reads	2020	Melbourne	Australia	Oceania	Clinical	A2072G	P62S	WT	WT	4/203	4703266	1216.2	18632216	67802	0.0144159	98.12	99.2896	37911	210	82041	721837	98	34	1052	380	NA	5	A
	DW436	SRR36444229	PRJNA1367946	This study	Reads	2020	Melbourne	Australia	Oceania	Clinical	A2072G	S83I	M95I	C1435T	106	2262184	584.971	10772780	31964	0.0141297	98.25	98.2928	27661	293	79958	789407	98	36	1204	1525	NA	1	B
	DW438	SRR36444228	PRJNA1367946	This study	Reads	2020	Melbourne	Australia	Oceania	Clinical	A2072G	S83I	M95I	C1435T	143	5425452	1402.95	9458872	21998	0.00405459	99.13	98.5973	46568	128	85088	675388	98	34	1274	1529	NA	4	B
	DW439	SRR36444226	PRJNA1367946	This study	Reads	2020	Melbourne	Australia	Oceania	Clinical	A2072G	WT	WT	WT	Novel_338	2234854	577.904	3704618	7536	0.00337203	98.84	97.4091	34364	105	85357	639157	98	33	1173	501	NA	5	A
	DW440	SRR36444225	PRJNA1367946	This study	Reads	2020	Melbourne	Australia	Oceania	Clinical	A2072G	S83I_P62S	WT	C1435T	77	10578762	2735.53	148853740	64272	0.00607557	68.77	98.9848	2402	271	17108	499325	79	33	789	1522	NA	4	B
	DW441	SRR36444224	PRJNA1367946	This study	Reads	2020	Melbourne	Australia	Oceania	Clinical	A2072G	WT	WT	C1435T_G200A	113	15131992	3912.93	17775914	24006	0.00158644	99.28	99.327	150333	52	167974	606256	99	33	1029	1204	NA	6	A
	DW442	SRR36444292	PRJNA1367946	This study	Reads	2020	Melbourne	Australia	Oceania	Clinical	A2072G	WT	WT	WT	Novel_338	5391778	1394.24	7662786	3080	0.00057124	98.78	99.097	46309	54	85357	611702	98	33	978	547	NA	5	A
	DW443	SRR36444291	PRJNA1367946	This study	Reads	2020	Melbourne	Australia	Oceania	Clinical	A2072G	S83I_P62S	WT	A742G	319	2674836	691.677	9746912	53924	0.0201597	97.42	98.1747	19858	194	50180	710710	97	34	1250	1489	NA	2	B
	DW444	SRR36444290	PRJNA1367946	This study	Reads	2020	Melbourne	Australia	Oceania	Clinical	WT	WT	WT	C1435T_C452T	7	6236726	1612.74	19889622	68030	0.010908	92.93	98.8622	30556	208	81485	742420	98	36	1205	1534	NA	4	B
	DW446	SRR36444289	PRJNA1367946	This study	Reads	2020	Melbourne	Australia	Oceania	Clinical	WT	WT	WT	A742G,_A1449G	Novel_329	6261538	1619.15	14306908	27066	0.00432258	99	98.68	39650	92	130813	640283	99	33	1097	1624	NA	2	B
	DW448	SRR36444288	PRJNA1367946	This study	Reads	2020	Melbourne	Australia	Oceania	Clinical	A2072G	WT	WT	C1435T	7	4449670	1150.63	11740790	27238	0.00612135	98.93	98.4952	39302	120	166623	654676	98	33	1114	1499	NA	4	B
	DW449	SRR36444287	PRJNA1367946	This study	Reads	2020	Melbourne	Australia	Oceania	Clinical	A2071G	S83I	WT	A742G	159	5405606	1397.82	6699676	3640	0.000673375	99.63	98.5707	56693	27	120018	587040	98	32	1029	1336	NA	2	B
	DW450	SRR36444286	PRJNA1367946	This study	Reads	2020	Melbourne	Australia	Oceania	Clinical	WT	P62S	WT	WT	88	9528360	2463.91	14543316	19694	0.00206688	99.36	98.9631	52741	63	89315	606220	98	32	1035	910	NA	5	A
	DW451	SRR36444284	PRJNA1367946	This study	Reads	2020	Melbourne	Australia	Oceania	Clinical	WT	WT	WT	C1435T_C452T	7	4142032	1071.07	5898660	6838	0.00165088	98.96	97.7829	35791	48	80605	597646	98	32	1010	1488	NA	4	B
	DW452	SRR36444283	PRJNA1367946	This study	Reads	2020	Melbourne	Australia	Oceania	Clinical	A2071G	WT	WT	C1435T	Novel_325	4478054	1157.97	4903632	2404	0.00053684	99.45	97.6951	40692	33	82491	577141	98	32	979	1141	NA	1	A
	DW454	SRR36444282	PRJNA1367946	This study	Reads	2020	Melbourne	Australia	Oceania	Clinical	A2072G	WT	WT	WT	6	7165662	1852.95	12818144	24480	0.00341629	99.05	98.5512	42569	63	164758	613541	98	33	1063	1074	NA	3	A
	DW456	SRR36444281	PRJNA1367946	This study	Reads	2020	Melbourne	Australia	Oceania	Clinical	A2072G	S83I	M95I	C1435T	143	11763446	3041.87	27875922	67472	0.00573573	98.99	98.8705	38430	111	85033	660916	98	34	1110	1509	NA	4	B
	DW458	SRR36444280	PRJNA1367946	This study	Reads	2020	Melbourne	Australia	Oceania	Clinical	A2072G	S83I	WT	C462T	108	5375884	1390.13	27325572	109934	0.0204495	97.41	98.7143	32884	148	84907	669833	97	34	1137	987	NA	3	A
	DW460	SRR36444279	PRJNA1367946	This study	Reads	2020	Melbourne	Australia	Oceania	Clinical	WT	P62S	WT	A742G	Novel_331	5543814	1433.56	14095328	31984	0.00576931	99.02	98.485	29576	101	95298	636229	98	33	1090	1665	NA	2	B
	DW462	SRR36444278	PRJNA1367946	This study	Reads	2020	Melbourne	Australia	Oceania	Clinical	A2072G	S83I	M95I	C1435T	143	6370258	1647.26	20652836	85470	0.013417	98.15	98.4462	25544	105	79678	635561	98	33	1113	1529	NA	4	B
	DW463	SRR36444277	PRJNA1367946	This study	Reads	2017	Melbourne	Australia	Oceania	Clinical	A2071G	WT	WT	C1435T_C714T	4	11000080	2844.48	18261758	41436	0.00376688	99.18	98.9243	45825	45	83958	596680	98	32	1062	1607	NA	4	B
	DW464	SRR36444276	PRJNA1367946	This study	Reads	2020	Melbourne	Australia	Oceania	Clinical	A2071G	S83I	WT	A742G_C609T	159	10003148	2586.68	21493808	31140	0.00311302	99.37	99.0893	80088	117	115871	646654	98	33	1077	1320	NA	2	B
	DW481	SRR36444275	PRJNA1367946	This study	Reads	2015	Melbourne	Australia	Oceania	Clinical	A2072G	WT	WT	C1435T	NA	6519212	1685.78	11725622	9326	0.00143054	93.85	98.1113	32348	63	72264	583753	97	32	999	1163	NA	1	A
	DW482	SRR36444273	PRJNA1367946	This study	Reads	2014	Melbourne	Australia	Oceania	Clinical	A2072G	WT	WT	C1435T	113	42846624	11079.6	204486796	33996	0.000793435	79.61	99.4747	14539	201	103769	707795	99	35	1091	1195	NA	6	A
	DW483	SRR36444272	PRJNA1367946	This study	Reads	2015	Melbourne	Australia	Oceania	Clinical	A2072G	WT	WT	WT	Novel_338	21047418	5442.58	179795098	101736	0.00483366	80.63	99.3985	5489	223	24102	631739	94	34	950	555	NA	5	A
	DW484	SRR36444271	PRJNA1367946	This study	Reads	2016	Melbourne	Australia	Oceania	Clinical	A2072G	WT	WT	C1435T	7	23200294	5999.29	26629592	22792	0.000982401	99.4	99.1318	46756	31	84732	578393	97	32	996	1511	NA	4	B
	DW485	SRR36444270	PRJNA1367946	This study	Reads	2016	Melbourne	Australia	Oceania	Clinical	A2072G	WT	WT	C1435T	7	8982614	2322.79	12448952	15032	0.00167345	98	98.4797	35418	57	80028	608240	98	33	1016	1485	NA	4	B
	DW486	SRR36444269	PRJNA1367946	This study	Reads	2017	Melbourne	Australia	Oceania	Clinical	A2071G	WT	WT	A742G_C1308T	4	6854768	1772.55	17006844	35554	0.00518675	98.8	98.3507	33202	125	79909	658572	97	34	1090	1547	NA	2	B
	DW487	SRR36444223	PRJNA1367946	This study	Reads	2016	Melbourne	Australia	Oceania	Clinical	A2071G	WT	WT	C1435T	NA	5469338	1414.3	67167222	167726	0.0306666	81.87	98.3028	3287	328	18127	622019	85	35	957	1552	NA	4	B
	DW488	SRR36444222	PRJNA1367946	This study	Reads	2015	Melbourne	Australia	Oceania	Clinical	A2071G	S83I	WT	C1435T_C835T	Novel_330	11296066	2921.01	18739924	37174	0.00329088	95.67	98.9129	37128	56	80071	597457	98	32	1020	1377	NA	1	A
	DW489	SRR36444221	PRJNA1367946	This study	Reads	2015	Melbourne	Australia	Oceania	Clinical	A2071G	WT	WT	C1435T_G450T	113	2817562	728.584	5820068	6024	0.00213802	96.94	97.4522	43917	57	79915	605095	98	33	1025	1132	NA	6	A
	DW493	SRR36444220	PRJNA1367946	This study	Reads	2016	Melbourne	Australia	Oceania	Clinical	A2071G	WT	WT	C1435T	Novel_344	1849896	478.359	48177820	80900	0.0437322	79.41	94.5726	1156	302	6582	310577	21	41	384	1447	NA	4	B
	M2282	ERS390293	PRJEB5172	Fookes 2017	Reads	1991	NA	Sweden	Europe	Clinical	WT	WT	WT	C1166T	5	1105578	285.888	1188832	16	1.44721e-05	99.98	99.5299	580525	1	580525	580525	100	32	987	282	5	NA	A
	M2300	ERS390285	PRJEB5172	Fookes 2017	Reads	1991	NA	Sweden	Europe	NA	WT	WT	WT	WT	21	735590	190.214	789740	6	8.15672e-06	99.98	99.5492	317445	4	317445	579751	100	32	987	240	5	NA	A
	M2321	ERS390296	PRJEB5172	Fookes 2017	Reads	NA	NA	Denmark	Europe	NA	WT	WT	WT	C1435T	12	748754	193.618	788132	4	5.34221e-06	99.98	99.311	579961	1	579961	579961	100	32	988	721	5	NA	A
	M2341	ERS390286	PRJEB5172	Fookes 2017	Reads	1991	NA	Sweden	Europe	NA	WT	P62S	WT	C1435T	2	731538	189.166	793374	4	5.46793e-06	99.98	99.2785	426251	3	426251	579422	100	32	988	551	5	NA	A
	M30	ERS390284	PRJEB5172	Fookes 2017	Reads	1980	NA	UK	Europe	Clinical	WT	WT	WT	T1186C	2	666580	172.369	725122	4	6.00078e-06	99.98	99.3685	579981	1	579981	579981	100	32	985	181	5	NA	A
	M6090	ERS390289	PRJEB5172	Fookes 2017	Reads	1994	NA	France	Europe	Clinical	WT	WT	WT	WT	2	632442	163.541	688424	10	1.58117e-05	99.98	99.4604	397857	4	397857	579295	100	32	991	246	5	NA	A
	M6151	ERS390289	PRJEB5172	Fookes 2017	Reads	1994	NA	France	Europe	Clinical	WT	WT	WT	WT	2	622564	160.987	679134	8	1.28501e-05	99.98	99.9457	580005	1	580005	580005	100	32	993	148	5	NA	A
	M6257	ERS390300	PRJEB5172	Fookes 2017	Reads	2004	NA	Sweden	Europe	NA	A2071G	WT	WT	WT	52	743070	192.148	793850	8	1.07661e-05	99.98	99.0577	580276	1	580276	580276	100	32	986	792	5	NA	A
	M6270	ERS390300	PRJEB5172	Fookes 2017	Reads	2004	NA	Australia	Oceania	NA	A2072G	WT	WT	WT	29	835592	216.073	897010	2	2.39351e-06	99.98	99.5228	579918	1	579918	579918	100	32	983	297	5	NA	A
	M6280	ERS390288	PRJEB5172	Fookes 2017	Reads	1997	NA	Sweden	Europe	NA	WT	D87N	WT	C905T	4	704954	182.292	757994	14	1.98595e-05	99.97	98.986	579832	1	579832	579832	100	32	989	1306	1	NA	A
	M6282	ERS390283	PRJEB5172	Fookes 2017	Reads	NA	NA	Japan	Asia	NA	WT	D87N	WT	A1449G	3	621860	160.805	700166	4	6.43232e-06	99.97	98.7526	582003	1	582003	582003	100	32	1000	1657	1	NA	B
	M6283	ERS390292	PRJEB5172	Fookes 2017	Reads	2003	NA	Japan	Asia	NA	WT	WT	WT	C1435T	4	711540	183.995	774128	6	8.43241e-06	99.98	98.8557	582025	1	582025	582025	100	32	1006	1705	1	NA	B
	M6284	ERS390294	PRJEB5172	Fookes 2017	Reads	2003	NA	Japan	Asia	NA	WT	WT	WT	WT	2	1224152	316.55	1315100	14	1.14365e-05	99.98	99.5158	455587	2	455587	579574	100	32	998	253	5	NA	A
	M6285	ERS390290	PRJEB5172	Fookes 2017	Reads	1997	NA	Sweden	Europe	NA	WT	WT	WT	C1435T	10	901344	233.076	970442	10	1.10945e-05	99.97	99.127	581788	1	581788	581788	100	32	992	983	1	NA	A
	M6286	ERS390297	PRJEB5172	Fookes 2017	Reads	2001	NA	Sweden	Europe	NA	WT	WT	WT	C1435T_C804T	15	870834	225.186	920758	14	1.60765e-05	99.98	99.0858	580188	1	580188	580188	100	32	997	1414	1	NA	A
	M6303	ERS390297	PRJEB5172	Fookes 2017	Reads	2003	NA	Norway	Europe	NA	A2072G	WT	WT	G1167A	2	1056518	273.202	1126654	2	1.89301e-06	99.98	99.4204	580003	1	580003	580003	100	32	993	393	5	NA	A
	M6312	ERS390297	PRJEB5172	Fookes 2017	Reads	1994	NA	France	Europe	NA	WT	WT	WT	WT	2	1092678	282.552	1168666	10	9.15183e-06	99.98	99.4863	319983	5	319983	579140	100	32	991	269	5	NA	A
	M6320	ERS390281	PRJEB5172	Fookes 2017	Reads	NA	NA	Australia	Oceania	NA	A2072G	WT	WT	T111C	Novel_328	883034	228.341	928924	14	1.58544e-05	99.98	99.2623	579932	1	579932	579932	100	32	987	882	1	NA	A
	M6327	ERS390281	PRJEB5172	Fookes 2017	Reads	2005	NA	Sweden	Europe	NA	WT	WT	WT	WT	79	693358	179.293	768444	10	1.44226e-05	99.98	99.4878	372841	4	372841	579191	100	32	989	243	5	NA	A
	M6328	ERS390291	PRJEB5172	Fookes 2017	Reads	1998	NA	Sweden	Europe	NA	WT	WT	WT	WT	Novel_331	772178	199.675	831126	10	1.29504e-05	99.98	99.4444	579941	3	579941	581350	100	32	989	300	5	NA	A
	M6475	ERS390291	PRJEB5172	Fookes 2017	Reads	2006	NA	Sweden	Europe	NA	WT	WT	WT	WT	6	773760	200.084	851912	18	2.3263e-05	99.98	98.8677	580529	1	580529	580529	100	32	991	874	5	NA	A
	M6489	ERS390301	PRJEB5172	Fookes 2017	Reads	2007	NA	Sweden	Europe	NA	A2072G	S83I	WT	C1435T	7	764608	197.718	816370	6	7.84716e-06	99.98	98.8598	181223	4	181360	581704	99	32	999	1517	4	NA	B
	M6593	ERS390279	PRJEB5172	Fookes 2017	Reads	2008	NA	Norway	Europe	NA	A2072G	WT	WT	C1435T	12	745376	192.744	796602	16	2.14657e-05	99.98	99.1163	374696	5	374696	581807	100	32	1003	675	5	NA	A
	M6604	ERS390303	PRJEB5172	Fookes 2017	Reads	2009	NA	Denmark	Europe	NA	A2071G	WT	WT	C1435T	Novel_326	837424	216.547	901142	4	4.77655e-06	99.98	98.8738	313755	2	313755	581846	100	32	994	1212	1	NA	A
	M6711	ERS390304	PRJEB5172	Fookes 2017	Reads	2010	NA	Australia	Oceania	NA	A2072G	S83I	WT	C1435T_G1054T	3	867546	224.336	940800	26	2.99696e-05	99.98	98.9222	581973	3	581973	583299	100	32	999	1540	1	NA	B
	M6713	ERS390280	PRJEB5172	Fookes 2017	Reads	2010	NA	Australia	Oceania	NA	WT	P62S	WT	A742G	Novel_332	740622	191.515	820728	2	2.70043e-06	99.98	98.7755	181297	6	239145	581788	99	32	988	1730	2	NA	B
	R32G	ERS390307	PRJEB5172	Fookes 2017	Reads	1974-1975	NA	US	N.America	Clinical	WT	WT	WT	WT	1	999326	258.413	1048212	20	2.00135e-05	99.98	100	580200	1	580200	580200	100	32	992	2	5	NA	A
	TW10-5G	ERS390309	PRJEB5172	Fookes 2017	Reads	1974-1975	NA	US	N.America	Clinical	WT	WT	WT	WT	1	809942	209.44	836472	8	9.87725e-06	99.98	100	580172	1	580172	580172	100	32	991	4	5	NA	A
	TW10-6G	ERS390308	PRJEB5172	Fookes 2017	Reads	1974-1975	NA	US	N.America	Clinical	WT	WT	WT	WT	1	916304	236.944	969718	12	1.30961e-05	99.99	100	548472	2	548472	579853	100	32	988	2	5	NA	A
	TW48-5G	ERS390306	PRJEB5172	Fookes 2017	Reads	1974-1975	NA	US	N.America	Clinical	WT	WT	WT	WT	1	838752	216.89	887232	10	1.19225e-05	99.99	99.9821	323757	3	323757	579472	100	32	989	5	5	NA	A
	UTMB-10G	ERS390305	PRJEB5172	Fookes 2017	Reads	1986	NA	US	N.America	Clinical	WT	WT	WT	WT	1	1054978	272.803	1097552	16		99.98	100	580180	1	580180	580180	100	32	990	2	5	NA	A
	M.genitalium G37	GCA_000027325.1	NA	NA	Assembly	NA	NA	US	N.America	Clinical	NA	NA	NA	NA	NA	NA	NA	NA	NA	NA	NA	NA	NA	NA	NA	NA	NA	NA	NA	0	NA	NA	NA
